# Supplementary material for: Silver-promoted selective fluorination of 2-aminopyrimidines: synthesis of 5-fluoro-2-aminopyrimidine derivatives
Source: Royal Society of Chemistry journal article supplement (doi:10.1039/c8qo01054d), 2018-11-12
Supplement: c8qo01054d1.pdf [file c8qo01054d1.pdf]

*Supporting Information*

**Silver-promoted selective fluorination of 2-aminopyrimidines:  
synthesis of 5-fluoro-2-aminopyrimidine derivatives**

Mingzhu Zhao, Juewang Cai and Xiaoming Zhao\*

*Department of Chemistry, Tongji University, 1239 Siping Road, Shanghai 200092 (P. R. China).*

*E-mail: xmzhao08@mail.tongji.edu.cn*

**Table of Contents**

|                                                                                       |                |
|---------------------------------------------------------------------------------------|----------------|
| <b>1. General information</b>                                                         | <b>S2</b>      |
| <b>2. General procedure for a fluorination of 2-aminopyrimidines with selectfluor</b> | <b>S2</b>      |
| <b>3. The procedure for the synthesis of fluorinated intermediate 5</b>               | <b>S2</b>      |
| <b>4. The procedure for the synthesis of Ag(dppm)1d complex</b>                       | <b>S3</b>      |
| <b>5. Three controlled experiments</b>                                                | <b>S4</b>      |
| <b>6. Compound characterization</b>                                                   | <b>S5-S10</b>  |
| <b>7. References</b>                                                                  | <b>S10</b>     |
| <b>8. NMR spectra data</b>                                                            | <b>S11-S33</b> |
| <b>9. X-ray crystallographic data of 3a, 3l, 5 and Ag(dppm)1d complex</b>             | <b>S34-S90</b> |

## 1. General information

All reagents were purchased from commercial sources and used without further purification.  $^1\text{H}$  NMR (TMS as the internal standard) and  $^{19}\text{F}$  NMR spectra (without outside standard) and  $^{13}\text{C}$  NMR was recorded on Bruker AM400 spectrometer.  $^1\text{H}$  NMR spectra were obtained at 400 MHz and recorded relative to tetramethylsilane signal (0 ppm) or residual protio-solvent.  $^{13}\text{C}$  NMR spectra were obtained at 101 MHz and chemical shifts were recorded relative to the solvent resonance ( $\text{CDCl}_3$ , 77.0 ppm;  $(\text{CD}_3)_2\text{SO}$ , 39.5 ppm). Data for  $^1\text{H}$  NMR are recorded as follows: chemical shift ( $\delta$ , ppm), multiplicity (s = singlet, d = doublet, t = triplet, m = multiplet or unresolved, br = broad singlet, coupling constant(s) in Hz, integration).  $^{19}\text{F}$  NMR spectra were obtained at 376 MHz. For the compounds reported with  $^{19}\text{F}$  NMR yields,  $\text{PhCF}_3$  (1.0 equivalent) was added to the reaction mixture as internal standard added after the reaction completed. IR spectra were measured on Thermo Nicolet spectrometer. The X-ray diffraction experiments were carried out on Bruker D8 Discover. Melting point were measured on WRS-2A.

## 2. General procedure for fluorination of 4-substituted 2-aminopyrimidines with selectfluor

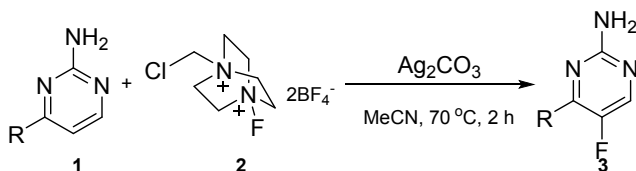

The mixture of 4-substituted 2-aminopyrimidine (0.2 mmol), selectfluor (85 mg, 0.24 mmol),  $\text{Ag}_2\text{CO}_3$  (110 mg, 0.4 mmol) in a component solvent of MeCN and  $\text{H}_2\text{O}$  (100/3) (2.0 mL) was stirred at  $70^\circ\text{C}$  for 2 h. After cooled to room temperature, the reaction mixture was diluted with ethyl acetate and then washed with water and brine. The organic phase was dried over anhydrous  $\text{Na}_2\text{SO}_4$  and filtered. The filtrate was concentrated under reduced pressure and the residue was purified flash chromatography on silica gel to afford the desired compounds **3**. Compounds **3a–n** were obtained in the similar manner.

## 3. The procedure for the synthesis of fluorinated intermediate of *Imatinib*<sup>[1]</sup>

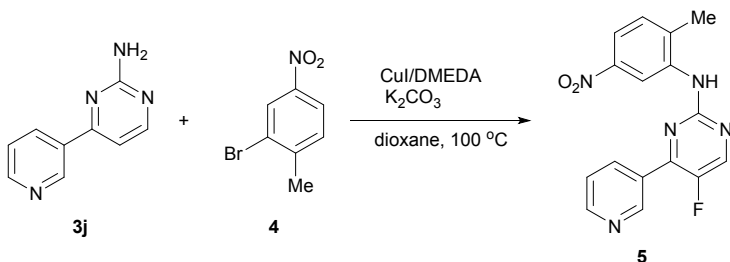

The compound 5-fluoro-4-(pyridin-3-yl)pyrimidin-2-amine **3j** (38 mg, 0.2 mmol),  $\text{CuI}$  (9.5 mg, 0.05 mmol), and anhydrous  $\text{K}_2\text{CO}_3$  (55 mg, 0.4 mmol) were added to a Schlenk sealed tube fitted with magnetic stirring bar. The tube was evacuated and back filled with argon three times. Dioxane (2 mL), 2-bromo-1-methyl-4-nitrobenzene **4** (43 mg, 0.2 mmol), and DMEDA (4.4 mg, 0.05 mmol) were added by syringe at room temperature. The reaction mixture was stirred at  $100^\circ\text{C}$  for 30 h and then cooled to room temperature. After completion, the reaction mixture was diluted with  $\text{AcOEt}$ , washed with water and brine. The organic phase was dried over anhydrous  $\text{Na}_2\text{SO}_4$  and filtered. The filtrate was concentrated in vacuo; and the residue was purified by column chromatography on silica gel to give the title compound **5** as yellowish powder.

#### 4. The procedure for the preparation of Ag(dppm)1d complex<sup>[2]</sup>

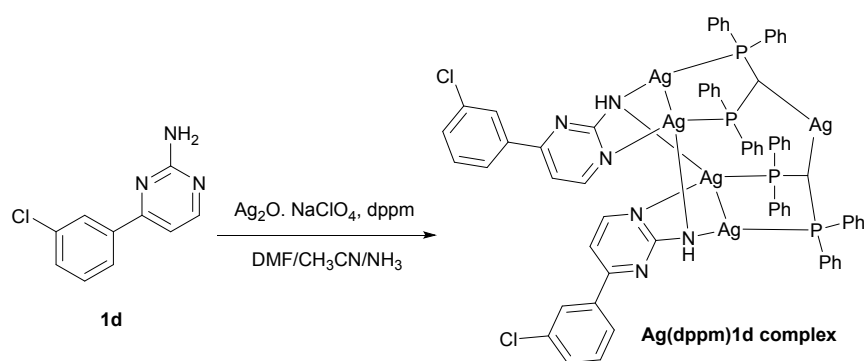

Reaction of  $\text{Ag}_2\text{O}$  (174 mg, 0.75 mmol), **1d** (102 mg, 0.5 mmol), dppm (192 mg, 0.5 mmol) and  $\text{NaClO}_4 \cdot \text{H}_2\text{O}$  (210 mg, 1.5 mmol) in DMF/ $\text{CH}_3\text{CN}$  media (3 mL/5 mL) in the presence of ammonia in air under ultrasonic treatment at 60 °C for 15 min. The resultant pale yellow solution was allowed slowly to evaporate under argon atmosphere at room temperature to give yellow plate crystals of Ag(dppm)**1d** complex (224 mg, 52% yield) for about three weeks.

## 6. Compound characterization

### 5-Fluoro-4-phenyl-2-aminopyrimidine (3a) [3]:

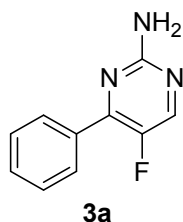

White solid; yield: 61 % (23.1 mg); m.p.: 165.4–166.9 °C.

$^1\text{H}$  NMR (400 MHz,  $\text{CDCl}_3$ )  $\delta$  8.23 (d,  $J_{\text{HF}} = 3.4$  Hz, 1H), 8.07 – 7.98 (m, 2H), 7.52 – 7.46 (m, 3H), 5.08 (s, 2H);  $^{13}\text{C}$  NMR (101 MHz,  $\text{CDCl}_3$ )  $\delta$  159.64 (d,  $J_{\text{CF}} = 3.1$  Hz), 152.61 (d,  $J_{\text{CF}} = 9.6$  Hz), 150.72 (d,  $J_{\text{CF}} = 251.8$  Hz), 147.02 (d,  $J_{\text{CF}} = 26.2$  Hz), 133.49 (d,  $J_{\text{CF}} = 5.2$  Hz), 130.77, 128.93 (d,  $J_{\text{CF}} = 6.2$  Hz), 128.61;  $^{19}\text{F}$  NMR (376 MHz,  $\text{CDCl}_3$ )  $\delta$  -152.49 (s, 1F). IR (KBr)  $\nu_{\text{max}}$  ( $\text{cm}^{-1}$ ) = 3323, 3175, 1652, 1558, 1473, 1355, 1274, 1200. HRMS (ESI-TOF)  $m/z$  calcd. for  $\text{C}_{11}\text{H}_9\text{FN}_3^+$   $[\text{M}+\text{H}]^+$ : 190.0775; found: 190.0743.

### 5-Fluoro-4-(3-fluorophenyl)-2-aminopyrimidine (3b):

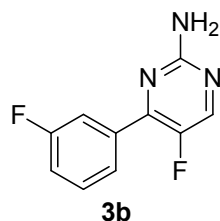

White solid; yield: 65 % (26.9 mg); m.p.: 163.2–164.9 °C.

$^1\text{H}$  NMR (400 MHz,  $\text{CDCl}_3$ )  $\delta$  8.25 (d,  $J_{\text{HF}} = 3.5$  Hz, 1H), 7.84 (d,  $J = 7.8$  Hz, 1H), 7.78 (d,  $J = 10.1$  Hz, 1H), 7.45 (dd,  $J = 14.0, 8.0$  Hz, 1H), 7.19 (td,  $J = 8.3, 2.1$  Hz, 1H), 5.10 (s, 2H);  $^{13}\text{C}$  NMR (101 MHz,  $\text{CDCl}_3$ )  $\delta$  162.83 (d,  $J_{\text{CF}} = 245.9$  Hz), 159.58 (d,  $J_{\text{CF}} = 2.8$  Hz), 150.94 (dd,  $J_{\text{CF}} = 9.2, 2.7$  Hz), 150.83 (d,  $J_{\text{CF}} = 253.72$  Hz), 147.42 (d,  $J_{\text{CF}} = 26.3$  Hz), 135.54 (dd,  $J_{\text{CF}} = 7.8, 5.4$  Hz), 130.13 (d,  $J_{\text{CF}} = 8.0$  Hz), 124.69 (dd,  $J_{\text{CF}} = 7.5, 3.0$  Hz), 117.72 (d,  $J_{\text{CF}} = 21.2$  Hz), 115.83 (dd,  $J_{\text{CF}} = 23.5, 6.1$  Hz);  $^{19}\text{F}$  NMR (376 MHz,  $\text{CDCl}_3$ )  $\delta$  -112.30 (s, 1F), -151.95 (s, 1F); IR (KBr)  $\nu_{\text{max}}$  ( $\text{cm}^{-1}$ ) = 3332, 3178, 1650, 1567, 1478, 1445, 1354, 1269, 1200; HRMS (ESI-TOF)  $m/z$  calcd. for  $\text{C}_{10}\text{H}_8\text{F}_2\text{N}_3^+$   $[\text{M}+\text{H}]^+$ : 208.0681; found: 208.0672.

### 5-Fluoro-4-(4-fluorophenyl)-2-aminopyrimidine (3c):

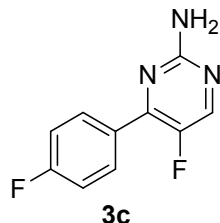

White solid; yield: 68 % (28.0 mg); m.p.: 154.1–155.8 °C.

$^1\text{H}$  NMR (400 MHz,  $\text{CDCl}_3$ )  $\delta$  8.22 (d,  $J_{\text{HF}} = 3.7$  Hz, 1H), 8.07 (dd,  $J = 8.1, 5.5$  Hz, 2H), 7.20 – 7.14 (m, 2H), 5.04 (s, 2H);  $^{13}\text{C}$  NMR (101 MHz,  $\text{CDCl}_3$ )  $\delta$  164.33 (d,  $J_{\text{CF}} = 251.9$  Hz), 159.55 (d,  $J_{\text{CF}} = 3.4$  Hz), 151.33 (d,  $J_{\text{CF}} = 9.5$  Hz), 150.55 (d,  $J_{\text{CF}} = 252.9$  Hz), 147.13 (d,  $J_{\text{CF}} = 26.3$  Hz), 131.16 (dd,  $J_{\text{CF}} = 8.7, 6.9$  Hz), 129.59 (dd,  $J_{\text{CF}} = 5.5, 3.3$  Hz), 115.72 (d,  $J_{\text{CF}} = 21.7$  Hz);  $^{19}\text{F}$  NMR (376 MHz,  $\text{CDCl}_3$ )  $\delta$  -109.05 (s, 1F), -152.45 (s, 1F); IR (KBr)  $\nu_{\text{max}}$

( $\text{cm}^{-1}$ ) = 3338, 3175, 1646, 1583, 1508, 1480, 1427, 1352, 1274, 1203; HRMS (ESI-TOF)  $m/z$  calcd. for  $\text{C}_{10}\text{H}_8\text{F}_2\text{N}_3^+$   $[\text{M}+\text{H}]^+$ : 208.0681; found: 208.0666.

**5-Fluoro-4-(3-chlorophenyl)-2-aminopyrimidine (3d):**

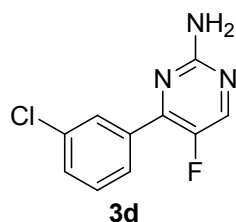

White solid; yield: 62 % (27.6 mg); m.p.: 145.7–147.3 °C.

$^1\text{H}$  NMR (400 MHz,  $\text{CDCl}_3$ )  $\delta$  8.25 (d,  $J_{\text{CF}} = 3.4$  Hz, 1H), 8.06 (s, 1H), 7.93 (d,  $J = 7.6$  Hz, 1H), 7.48 – 7.40 (m, 2H), 5.06 (s, 2H).  $^{13}\text{C}$  NMR (101 MHz,  $\text{CDCl}_3$ )  $\delta$  159.56 (d,  $J_{\text{CF}} = 2.8$  Hz), 150.86 (d,  $J_{\text{CF}} = 9.3$  Hz), 150.61 (d,  $J_{\text{CF}} = 259.6$ ), 147.46 (d,  $J_{\text{CF}} = 26.1$  Hz), 135.16 (d,  $J_{\text{CF}} = 5.4$  Hz), 134.73, 130.77, 129.84, 128.90 (d,  $J_{\text{CF}} = 6.1$  Hz), 127.11 (d,  $J_{\text{CF}} = 7.6$  Hz).  $^{19}\text{F}$  NMR (376 MHz,  $\text{CDCl}_3$ )  $\delta$  -151.98 (s, 1F). IR (KBr)  $\nu_{\text{max}}$  ( $\text{cm}^{-1}$ ) = 3339, 3183, 1645, 1568, 1553, 1477, 1431, 1351, 1274, 1200. HRMS (ESI-TOF)  $m/z$  calcd. for  $\text{C}_{10}\text{H}_8\text{ClFN}_3^+$   $[\text{M}+\text{H}]^+$ : 224.0385; found: 224.0408.

**5-Fluoro-4-(4-chlorophenyl)-2-aminopyrimidine (3e):**

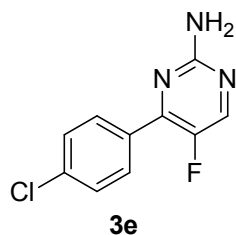

White solid; yield: 73 % (32.5 mg); m.p.: 127.0–128.9 °C.

$^1\text{H}$  NMR (400 MHz,  $\text{CDCl}_3$ )  $\delta$  8.24 (s, 1H), 8.01 (d,  $J = 7.9$  Hz, 2H), 7.46 (d,  $J = 7.3$  Hz, 2H), 5.07 (s, 2H);  $^{13}\text{C}$  NMR (101 MHz,  $\text{CDCl}_3$ )  $\delta$  159.60 (d,  $J_{\text{CF}} = 3.0$  Hz), 151.17 (d,  $J_{\text{CF}} = 9.1$  Hz), 151.16 (d,  $J_{\text{CF}} = 9.2$ ), 150.88 (d,  $J_{\text{CF}} = 253.2$ ), 147.28 (d,  $J_{\text{CF}} = 26.2$  Hz), 137.04, 131.89 (d,  $J_{\text{CF}} = 5.4$  Hz), 130.29 (d,  $J_{\text{CF}} = 6.8$  Hz), 128.88;  $^{19}\text{F}$  NMR (376 MHz,  $\text{CDCl}_3$ )  $\delta$  -152.03 (s, 1F); IR (KBr)  $\nu_{\text{max}}$  ( $\text{cm}^{-1}$ ) = 3331, 3186, 1647, 1594, 1574, 1473, 1422, 1353, 1281, 1203; HRMS (ESI-TOF)  $m/z$  calcd. for  $\text{C}_{10}\text{H}_8\text{ClFN}_3^+$   $[\text{M}+\text{H}]^+$ : 224.0385; found: 224.0361.

**5-Fluoro-4-(4-cyanophenyl)-2-aminopyrimidine (3f):**

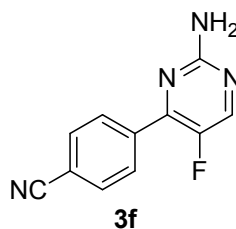

White solid; yield: 52 % (22.2 mg); m.p.: 198.1–199.2 °C.

$^1\text{H}$  NMR (400 MHz,  $\text{CDCl}_3$ )  $\delta$  8.30 (d,  $J_{\text{CF}} = 3.3$  Hz, 1H), 8.16 (d,  $J = 8.2$  Hz, 2H), 7.78 (d,  $J = 8.4$  Hz, 2H), 5.15 (s, 2H);  $^{13}\text{C}$  NMR (101 MHz,  $\text{CDCl}_3$ )  $\delta$  159.68 (d,  $J_{\text{CF}} = 2.9$  Hz), 150.71 (d,  $J_{\text{CF}} = 253.7$  Hz), 150.01 (d,  $J_{\text{CF}} = 9.1$  Hz), 147.94 (d,  $J_{\text{CF}} = 26.1$  Hz), 137.66 (d,  $J_{\text{CF}} = 5.4$  Hz), 132.28, 129.49 (d,  $J_{\text{CF}} = 6.8$  Hz), 118.37, 114.16;  $^{19}\text{F}$  NMR (376 MHz,  $\text{CDCl}_3$ )  $\delta$  -151.66 (s, 1F); IR (KBr)  $\nu_{\text{max}}$  ( $\text{cm}^{-1}$ ) = 3292, 3160, 2223, 1641, 1569, 1483, 1354, 1220, 1202; HRMS (ESI-TOF)  $m/z$  calcd. for  $\text{C}_{11}\text{H}_8\text{FN}_4^+$   $[\text{M}+\text{H}]^+$ : 215.0728; found: 215.0731.

**5-Fluoro-4-(3,4-difluorophenyl)-2-aminopyrimidine (3g):**

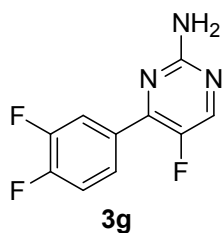

White solid; yield: 66 % (29.7 mg); m.p.: 129.2–130.7 °C.

$^1\text{H}$  NMR (400 MHz,  $\text{CDCl}_3$ )  $\delta$  8.24 (d,  $J_{\text{HF}} = 3.6$  Hz, 1H), 7.96 (ddd,  $J = 11.4, 7.8, 1.9$  Hz, 1H), 7.90 – 7.82 (m, 1H), 7.26 (dd,  $J = 18.0, 8.8$  Hz, 1H), 5.10 (s, 2H);  $^{13}\text{C}$  NMR (101 MHz,  $\text{CDCl}_3$ )  $\delta$  159.53 (d,  $J_{\text{CF}} = 2.9$  Hz), 151.91 (ddd,  $J_{\text{CF}} = 254.9\text{Hz}, 12.8$  Hz, 1.4 Hz), 150.51 (d,  $J_{\text{CF}} = 253.5\text{Hz}$ ), 150.43 (dd,  $J_{\text{CF}} = 249.3\text{Hz}, 12.8$  Hz), 150.11 – 149.68 (m), 147.52 (d,  $J_{\text{CF}} = 26.3$  Hz), 130.49 – 130.33 (m), 125.92 – 125.36 (m), 118.18 (dd,  $J_{\text{CF}} = 19.2, 6.6$  Hz), 117.46 (d,  $J_{\text{CF}} = 17.6$  Hz);  $^{19}\text{F}$  NMR (376 MHz,  $\text{CDCl}_3$ )  $\delta$  -133.57 (d,  $J = 21.5$  Hz, 1F), -136.75 (d,  $J = 21.5$  Hz, 1F), 152.08 (s, 1F); IR (KBr)  $\nu_{\text{max}}$  ( $\text{cm}^{-1}$ ) = 3310, 3176, 1645, 1582, 1558, 1508, 1474, 1419, 1351, 1284, 1203; HRMS (ESI-TOF)  $m/z$  calcd. for  $\text{C}_{10}\text{H}_7\text{F}_3\text{N}_3^+$   $[\text{M}+\text{H}]^+$ : 226.0587; found: 226.0663.

**5-Fluoro-4-(3,5-difluorophenyl)-2-aminopyrimidine (3h):**

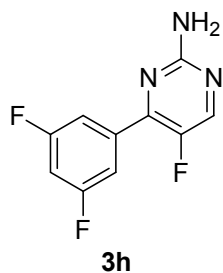

White solid; yield: 60 % (27.0 mg); m.p.: 159.5–161.6 °C.

$^1\text{H}$  NMR (400 MHz,  $\text{CDCl}_3$ )  $\delta$  8.27 (d,  $J_{\text{HF}} = 3.5$  Hz, 1H), 7.63 (d,  $J = 6.7$  Hz, 2H), 6.95 (ddd,  $J = 8.6, 5.4, 2.2$  Hz, 1H), 5.13 (s, 2H);  $^{13}\text{C}$  NMR (101 MHz,  $\text{CDCl}_3$ )  $\delta$  163.00 (dd,  $J_{\text{CF}} = 248.4\text{Hz}, J_{\text{CF}} = 12.5\text{Hz}$ ), 159.53 (d,  $J_{\text{CF}} = 2.9\text{Hz}$ ), 150.51 (d,  $J_{\text{CF}} = 254.5\text{Hz}$ ), 149.56 – 149.41 (m), 147.88 (d,  $J_{\text{CF}} = 26.2$  Hz), 136.55 – 136.31 (m), 112.11 – 111.768 (m), 106.11 (dd,  $J_{\text{CF}} = 25.4$  Hz,  $J_{\text{CF}} = 25.4$  Hz);  $^{19}\text{F}$  NMR (376 MHz,  $\text{CDCl}_3$ )  $\delta$  -108.90 (s, 2F), -152.53 (s, 1F); IR (KBr)  $\nu_{\text{max}}$  ( $\text{cm}^{-1}$ ) = 3345, 3198, 1647, 1603, 1572, 1474, 1440, 1355, 1312, 1200; HRMS (ESI-TOF)  $m/z$  calcd. for  $\text{C}_{10}\text{H}_8\text{F}_2\text{N}_3^+$   $[\text{M}+\text{H}]^+$ : 226.0587; found: 226.0600.

**5-Fluoro-4-(3,4-dichlorophenyl)-2-aminopyrimidine (3i):**

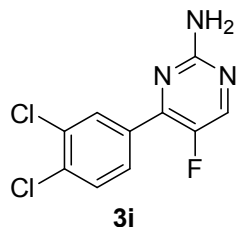

White solid; yield: 61 % (31.4 mg); m.p.: 154.0–155.7 °C.

$^1\text{H}$  NMR (400 MHz,  $\text{CDCl}_3$ )  $\delta$  8.25 (d,  $J_{\text{CF}} = 2.9$  Hz, 1H), 8.20 (d,  $J = 1.8$  Hz, 1H), 7.91 (dd,  $J = 8.5, 1.1$  Hz, 1H), 7.55 (d,  $J = 8.5$  Hz, 1H), 5.09 (s, 2H);  $^{13}\text{C}$  NMR (101 MHz,  $\text{CDCl}_3$ )  $\delta$  159.57 (d,  $J_{\text{CF}} = 2.9$  Hz), 150.13 (d,  $J_{\text{CF}} = 254.32$  Hz), 149.68 (d,  $J_{\text{CF}} = 9.0$  Hz), 147.62 (d,  $J_{\text{CF}} = 26.0$  Hz), 135.14, 133.31 (d,  $J_{\text{CF}} = 5.5$  Hz), 133.07, 130.73 (d,  $J_{\text{CF}} = 6.6$  Hz), 130.58, 128.10 (d,  $J_{\text{CF}} = 8.0$  Hz);  $^{19}\text{F}$  NMR (376 MHz,  $\text{CDCl}_3$ )  $\delta$  -151.59 (s, 1F); IR (KBr)  $\nu_{\text{max}}$

( $\text{cm}^{-1}$ ) = 3336, 3203, 1642, 1588, 1462, 1415, 1345, 1196; HRMS (ESI-TOF)  $m/z$  calcd. for  $\text{C}_{10}\text{H}_7\text{Cl}_2\text{FN}_3^+$   $[\text{M}+\text{H}]^+$ : 257.9996; found: 257.9991.

**5-Fluoro-4-(4-methoxyphenyl)-2-aminopyrimidine (3j):**

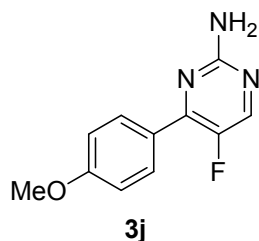

White solid; yield: 50 % (21.9 mg); m.p.: 148.8–150.9 °C.

$^1\text{H}$  NMR (400 MHz,  $\text{CDCl}_3$ )  $\delta$  8.17 (d,  $J_{\text{HF}} = 3.9$  Hz, 1H), 8.05 (d,  $J = 8.9$  Hz, 2H), 6.99 (d,  $J = 9.0$  Hz, 2H), 5.02 (s, 2H), 3.87 (s, 3H);  $^{13}\text{C}$  NMR (101 MHz,  $\text{CDCl}_3$ )  $\delta$  161.71, 159.50 (d,  $J_{\text{CF}} = 2.9$  Hz), 152.08 (d,  $J_{\text{CF}} = 9.3$  Hz), 150.57 (d,  $J_{\text{CF}} = 251.0$  Hz), 146.58 (d,  $J_{\text{CF}} = 26.4$  Hz), 130.64 (d,  $J_{\text{CF}} = 7.0$  Hz), 125.93 (d,  $J_{\text{CF}} = 5.5$  Hz), 114.00, 55.41;  $^{19}\text{F}$  NMR (376 MHz,  $\text{CDCl}_3$ )  $\delta$  -152.45(s, 1F); IR (KBr)  $\nu_{\text{max}}$  ( $\text{cm}^{-1}$ ) = 3323, 3196, 1652, 1576, 1558, 1507, 1472, 1457, 1257, 1203; HRMS (ESI-TOF)  $m/z$  calcd. for  $\text{C}_{11}\text{H}_{11}\text{FN}_3\text{O}^+$   $[\text{M}+\text{H}]^+$ : 220.0881; found: 220.0893.

**5-Fluoro-4-(4-tolyl)-2-aminopyrimidine (3k):**

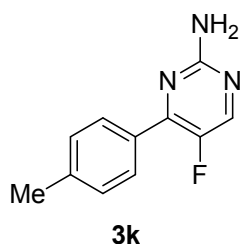

White solid; yield: 51 % (20.7 mg); m.p.: 142.6–143.7 °C.

$^1\text{H}$  NMR (400 MHz,  $\text{CDCl}_3$ )  $\delta$  8.20 (d,  $J_{\text{HF}} = 2.7$  Hz, 1H), 7.93 (d,  $J = 8.0$  Hz, 2H), 7.29 (d,  $J = 7.8$  Hz, 2H), 5.07 (s, 2H), 2.42 (s, 3H);  $^{13}\text{C}$  NMR (101 MHz,  $\text{CDCl}_3$ )  $\delta$  159.58 (d,  $J_{\text{CF}} = 3.0$  Hz), 152.60 (d,  $J_{\text{CF}} = 9.4$  Hz), 150.69 (d,  $J_{\text{CF}} = 251.6$  Hz), 146.79 (d,  $J_{\text{CF}} = 26.3$  Hz), 141.19, 130.68 (d,  $J_{\text{CF}} = 5.3$  Hz), 129.35, 128.87 (d,  $J_{\text{CF}} = 6.5$  Hz), 21.53;  $^{19}\text{F}$  NMR (376 MHz,  $\text{CDCl}_3$ )  $\delta$  -152.38(s, 1F); IR (KBr)  $\nu_{\text{max}}$  ( $\text{cm}^{-1}$ ) = 3326, 3182, 1648, 1573, 1473, 1421, 1351, 1200; HRMS (ESI-TOF)  $m/z$  calcd. for  $\text{C}_{11}\text{H}_{11}\text{FN}_3^+$   $[\text{M}+\text{H}]^+$ : 204.0932; found: 204.0944.

**5-Fluoro-4-(pyridin-3-yl)-2-aminopyrimidine (3l):**

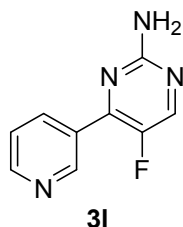

White solid; yield: 50 % (19.0 mg); m.p.: 160.2–162.0 °C.

$^1\text{H}$  NMR (400 MHz,  $\text{CDCl}_3$ )  $\delta$  9.27 (s, 1H), 8.72 (d,  $J = 3.7$  Hz, 1H), 8.34 (d,  $J = 8.0$  Hz, 1H), 8.28 (d,  $J = 3.3$  Hz, 1H), 7.43 (dd,  $J = 7.8, 4.8$  Hz, 1H), 5.14 (s, 2H);  $^{13}\text{C}$  NMR (101 MHz,  $\text{CDCl}_3$ )  $\delta$  159.72 (d,  $J_{\text{CF}} = 2.8$  Hz), 151.37, 150.70 (d,  $J_{\text{CF}} = 253.7$ ), 150.03 (d,  $J_{\text{CF}} = 8.4$  Hz), 149.88 (d,  $J_{\text{CF}} = 10.3$  Hz), 147.46 (d,  $J_{\text{CF}} = 25.6$ ), 136.14 (d,  $J_{\text{CF}} = 6.1$  Hz), 129.49 (d,  $J_{\text{CF}} = 5.8$  Hz), 123.42;  $^{19}\text{F}$  NMR (376 MHz,  $\text{CDCl}_3$ )  $\delta$  -152.16(s, 1F); IR (KBr)  $\nu_{\text{max}}$  ( $\text{cm}^{-1}$ ) = 3321, 3175, 1642, 1588, 1468, 1350, 1270, 1203; HRMS (ESI-TOF)  $m/z$  calcd. for  $\text{C}_9\text{H}_8\text{FN}_4^+$   $[\text{M}+\text{H}]^+$ : 191.0728; found: 191.0708.

**(E)-5-Fluoro-4-styryl-2-aminopyrimidine (3m):**

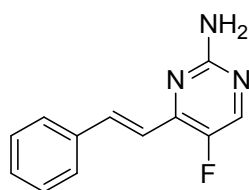

**3m**

White solid; yield: 52% (22.4 mg); m.p.: 143.6–145.7 °C.

$^1\text{H}$  NMR (400 MHz,  $\text{CDCl}_3$ )  $\delta$  8.15 (s, 1H), 7.90 (d,  $J = 16.0$  Hz, 1H), 7.61 (d,  $J = 7.0$  Hz, 2H), 7.42–7.34 (m, 3H), 7.19 (d,  $J = 16.0$  Hz, 1H), 4.96 (s, 1H);  $^{13}\text{C}$  NMR (101 MHz,  $\text{CDCl}_3$ )  $\delta$  159.38 (d,  $J_{\text{CF}} = 2.8$  Hz), 150.78 (d,  $J_{\text{CF}} = 11.1$  Hz), 150.24 (d,  $J_{\text{CF}} = 252.8$ ), 145.98 (d,  $J_{\text{CF}} = 23.9$  Hz), 138.11 (d,  $J_{\text{CF}} = 4.0$  Hz), 135.77, 129.57, 128.89, 127.86, 118.21;  $^{19}\text{F}$  NMR (376 MHz,  $\text{CDCl}_3$ )  $\delta$  -155.75 (s, 1F); IR (KBr)  $\nu_{\text{max}}$  ( $\text{cm}^{-1}$ ) = 3333, 3200, 1648, 1578, 1469, 1422, 1352, 1255, 1214, 1192, 983; HRMS (ESI-TOF)  $m/z$  calcd. for  $\text{C}_{12}\text{H}_{11}\text{FN}_3^+$   $[\text{M}+\text{H}]^+$ : 216.0932; found: 216.0901.

**5-Fluoro-*N*-(3-nitrophenyl)-2,4-diaminopyrimidine (3n):**

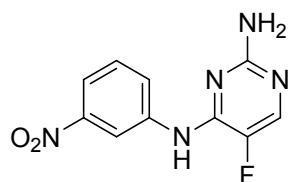

**3n**

Yellow powder; yield: 55% (27.4 mg); m.p.: 229.5–231.3 °C.

$^1\text{H}$  NMR (400 MHz, DMSO)  $\delta$  9.60 (s, 1H), 8.65 (t,  $J = 1.9$  Hz, 1H), 8.45 (d,  $J = 8.1$  Hz, 1H), 7.97 (d,  $J = 3.7$  Hz, 1H), 7.84 (dd,  $J = 8.1, 1.3$  Hz, 1H), 7.57 (t,  $J = 8.2$  Hz, 1H), 6.35 (s, 2H);  $^{13}\text{C}$  NMR (101 MHz, DMSO)  $\delta$  159.73 (d,  $J_{\text{CF}} = 3.3$  Hz), 149.71 (d,  $J_{\text{CF}} = 10.4$  Hz), 148.41, 142.20 (d,  $J_{\text{CF}} = 19.2$  Hz), 141.34, 140.21 (d,  $J_{\text{CF}} = 244.1$  Hz), 130.24, 126.56, 117.01, 114.80;  $^{19}\text{F}$  NMR (376 MHz, DMSO)  $\delta$  -167.74 (s, 1F); IR (KBr)  $\nu_{\text{max}}$  ( $\text{cm}^{-1}$ ) = 3482, 3370, 3309, 3170, 1634, 1616, 1580, 1533, 1458, 1354, 1336, 1244, 1230; HRMS (ESI-TOF)  $m/z$  calcd. for  $\text{C}_{10}\text{H}_8\text{FN}_5\text{NaO}_2^+$   $[\text{M}+\text{Na}]^+$ : 272.0554; found: 272.0533.

**3-Fluoro-4-phenylpyridin-2-amine (3p)<sup>[4]</sup>**

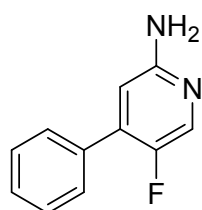

**3p**

Pale yellow solid; mp 125.9–127.3 °C; 5% yield (1.0 mg).

$^1\text{H}$  NMR (400 MHz,  $\text{CDCl}_3$ )  $\delta$  = 8.00 (d,  $J = 2.6$  Hz, 1H), 7.55 (d,  $J = 7.2$  Hz, 2H), 7.45 (t,  $J = 7.7$  Hz, 3H), 6.56 (d,  $J = 5.2$  Hz, 1H), 4.38 (s, 2H).  $^{19}\text{F}$  NMR (376 MHz,  $\text{CDCl}_3$ )  $\delta$  = -148.3.

**5-Fluoro-*N*-(2-methyl-5-nitrophenyl)-4-(pyridin-3-yl)pyrimidin-2-amine (5):**



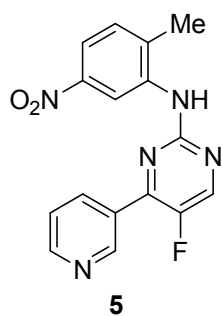

Yellowish powder; yield: 70 % (45.3 mg); m.p.: 208.2–209.5 °C.

$^1\text{H}$  NMR (400 MHz,  $\text{CDCl}_3$ )  $\delta$  9.38 (d,  $J = 1.9$  Hz, 2H), 8.77 (s, 1H), 8.56 (d,  $J = 8.0$  Hz, 1H), 8.48 (d,  $J = 3.1$  Hz, 1H), 7.87 (dd,  $J = 8.3, 2.1$  Hz, 1H), 7.53 (dd,  $J = 7.8, 4.9$  Hz, 1H), 7.36 (d,  $J = 8.3$  Hz, 1H), 7.17 (s, 1H), 2.47 (s, 3H);  $^{13}\text{C}$  NMR (101 MHz,  $\text{CDCl}_3$ )  $\delta$  155.92 (d,  $J_{\text{CF}} = 2.7$  Hz), 151.86, 151.25 (d,  $J_{\text{CF}} = 257.2$  Hz), 150.17 (d,  $J_{\text{CF}} = 10.7$  Hz), 149.70 (d,  $J_{\text{CF}} = 10.0$  Hz), 147.87 (d,  $J_{\text{CF}} = 26.2$  Hz), 147.08, 138.4, 136.25 (d,  $J_{\text{CF}} = 5.2$  Hz), 133.53, 130.83, 129.92 (d,  $J_{\text{CF}} = 3.4$  Hz), 123.85, 117.38, 114.19, 18.29;  $^{19}\text{F}$  NMR (376 MHz,  $\text{CDCl}_3$ )  $\delta$  -147.25 (s, 1F); IR (KBr)  $\nu_{\text{max}}$  ( $\text{cm}^{-1}$ ) = 3422, 1548, 1525, 1444, 1416, 1397, 1343, 1299, 1264; HRMS (ESI-TOF)  $m/z$  calcd. for  $\text{C}_{16}\text{H}_{13}\text{FN}_5\text{O}_2^+$   $[\text{M}+\text{H}]^+$ : 326.1048; found: 326.1052.

## 7. References

- [1] Y. F. Liu, C. L. Wang, Y. J. Bai, N. Han, J. P. Jiao, X. L. Qi, *Organic Process Research & Development*, **2008**, *12*, 490-495.
- [2] D. Sun, N. Zhang, R. B. Huang, L. S. Zheng, *Inorg. Chem. Commun*, **2011**, *14*, 1039-1042.
- [3] K. Funabiki, T. Ohtsuki, T. Ishihara, H. Yamanaka, *Chemistry Letters*, **1995**, *3*, 239-240.
- [4] G. Zhou, Y. Tian, X. Zhao, W. Dan, *Org. Lett.*, **2018**, *20*, 4858-4861.

## 8. NMR spectra data

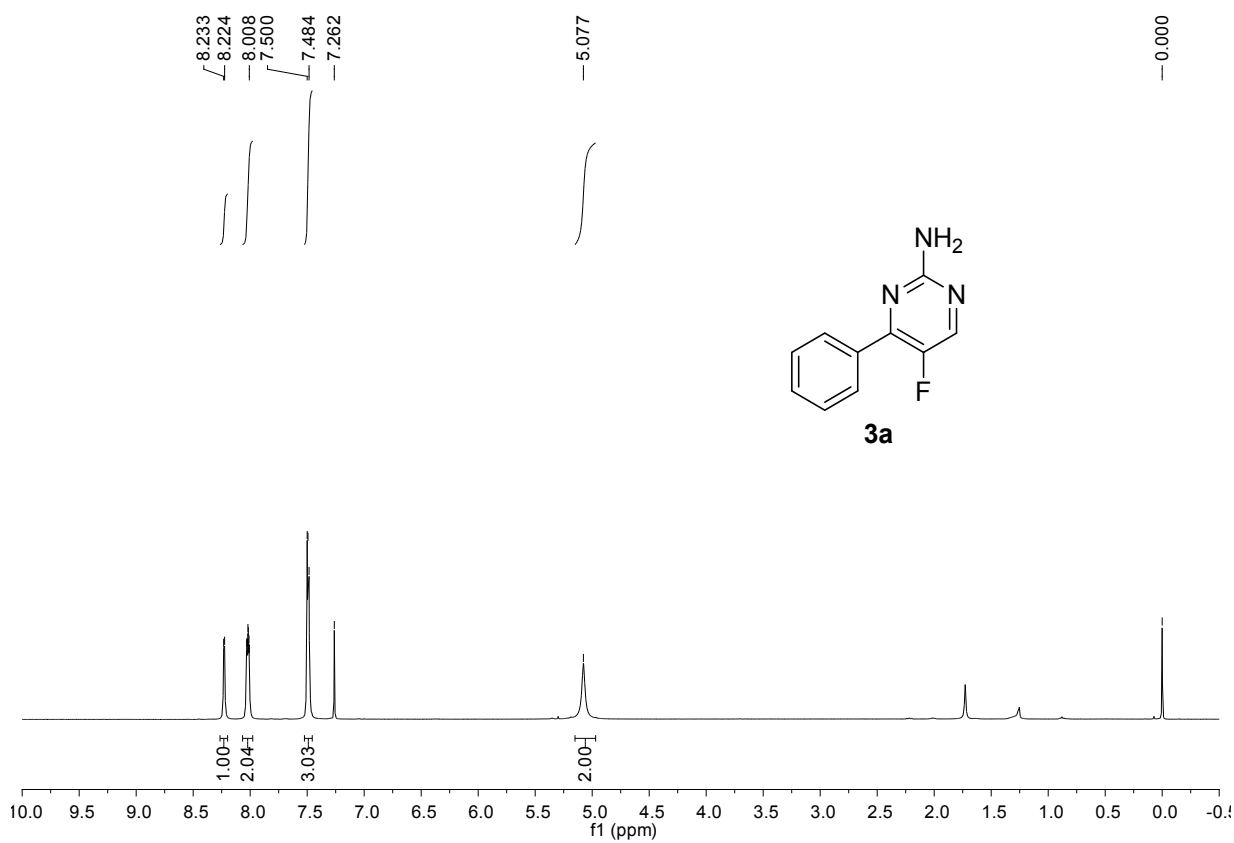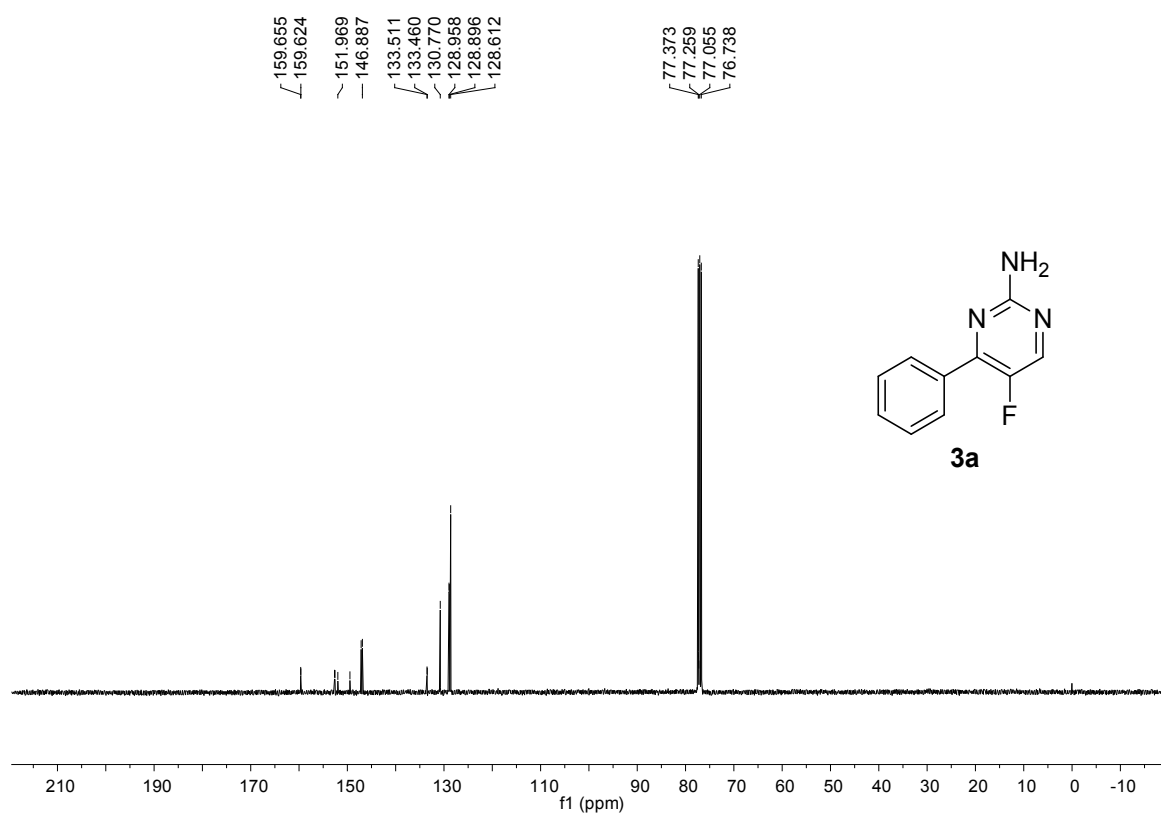

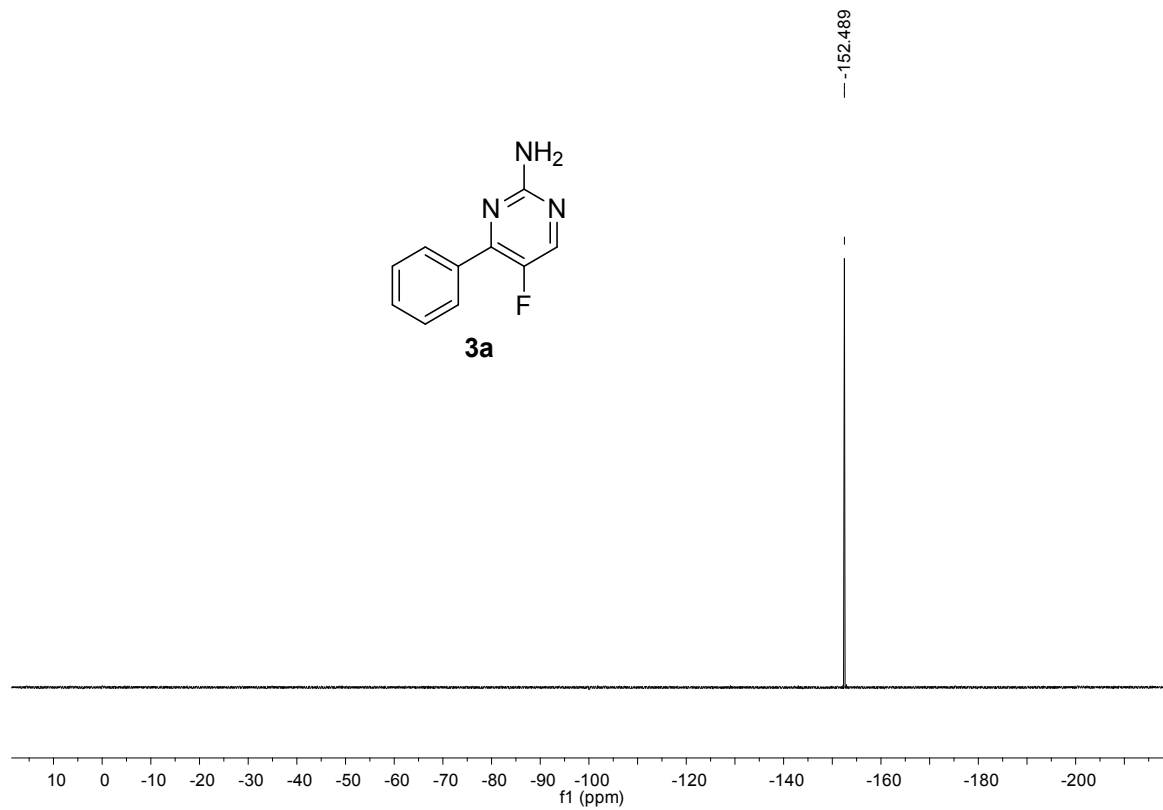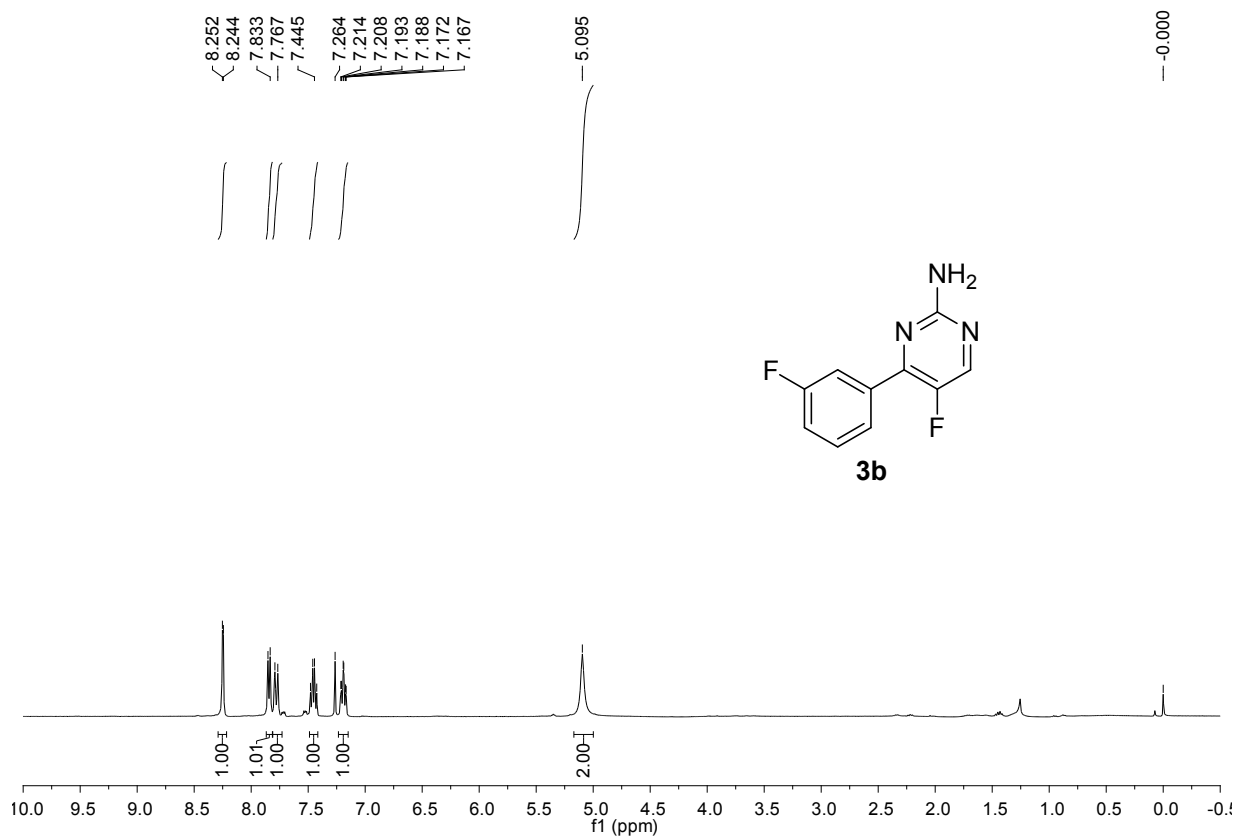

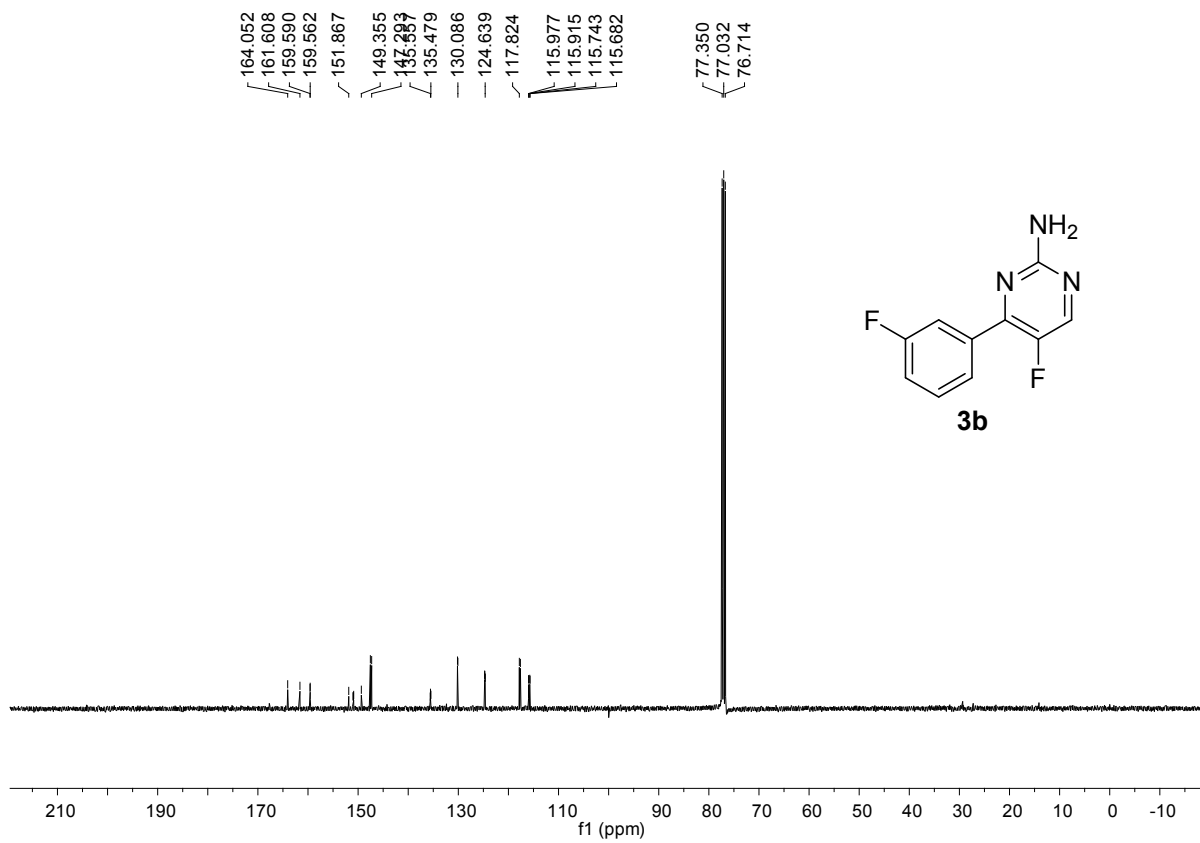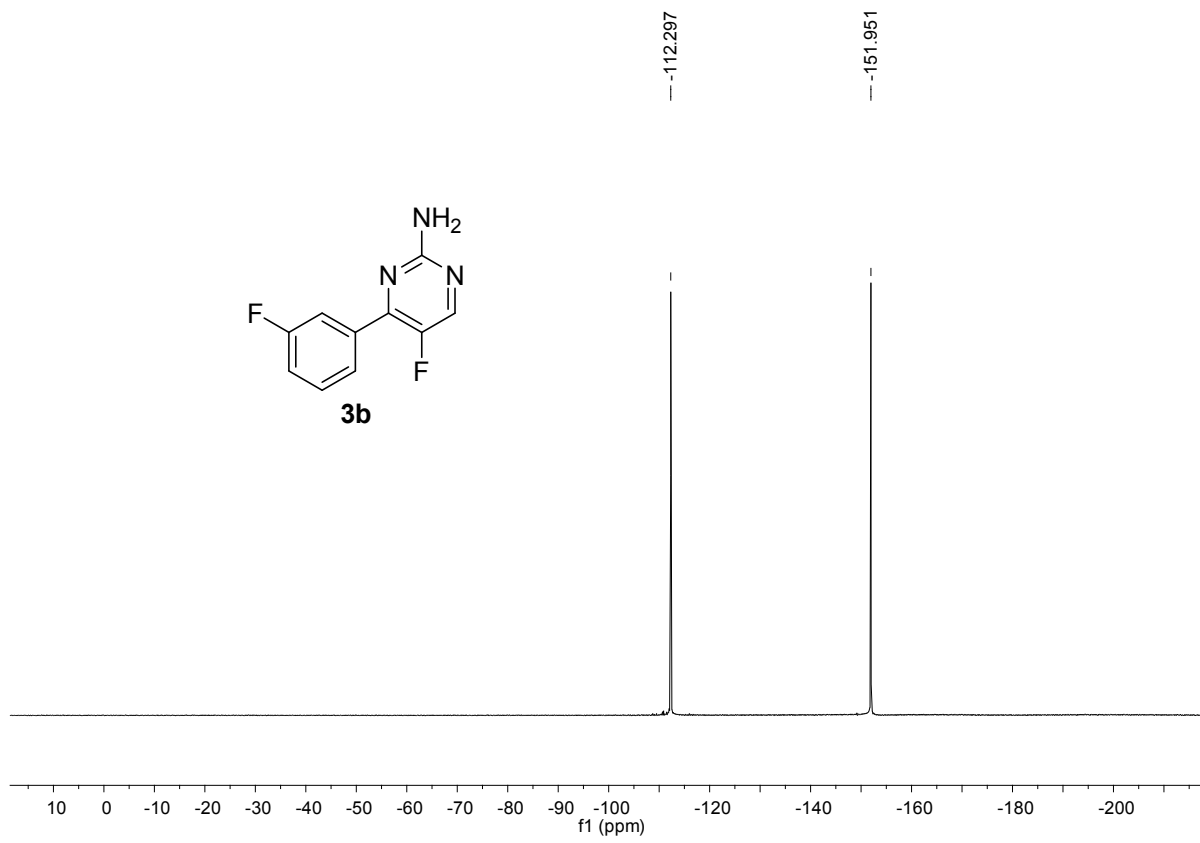

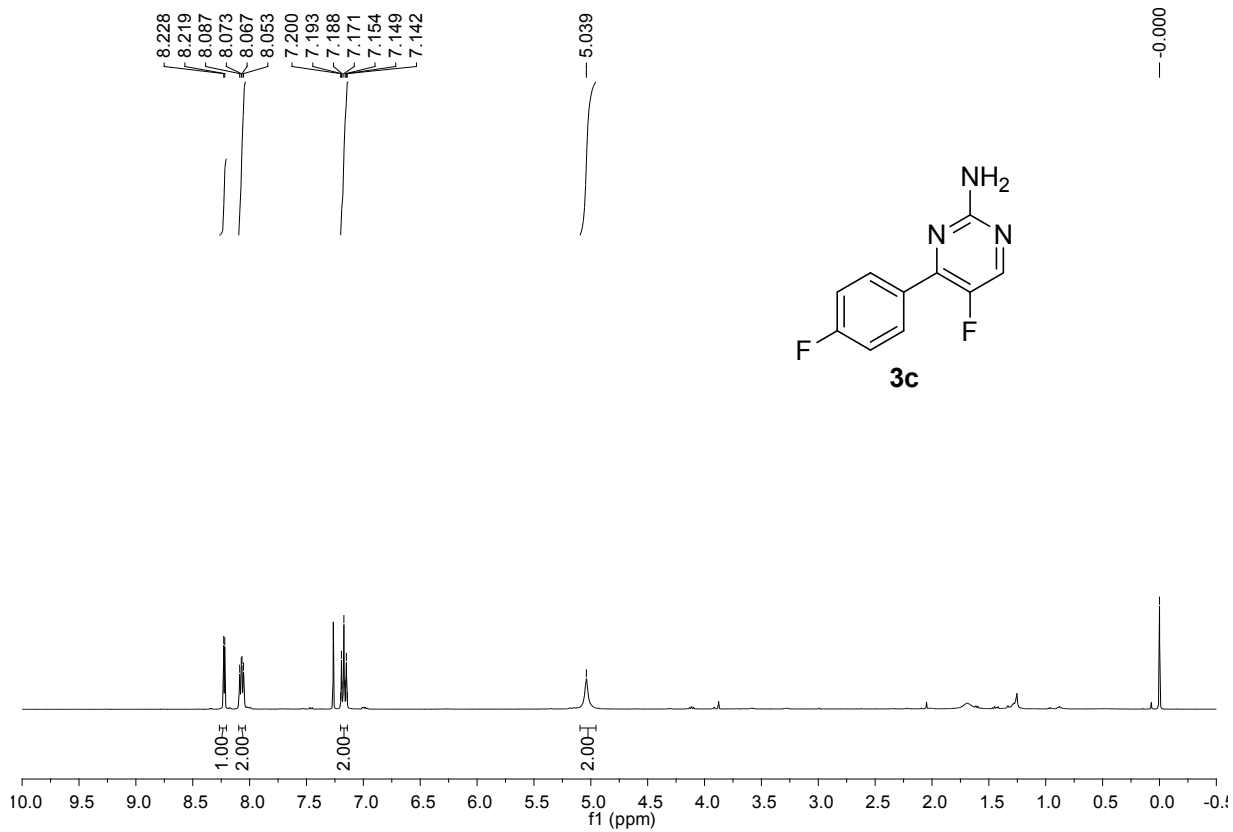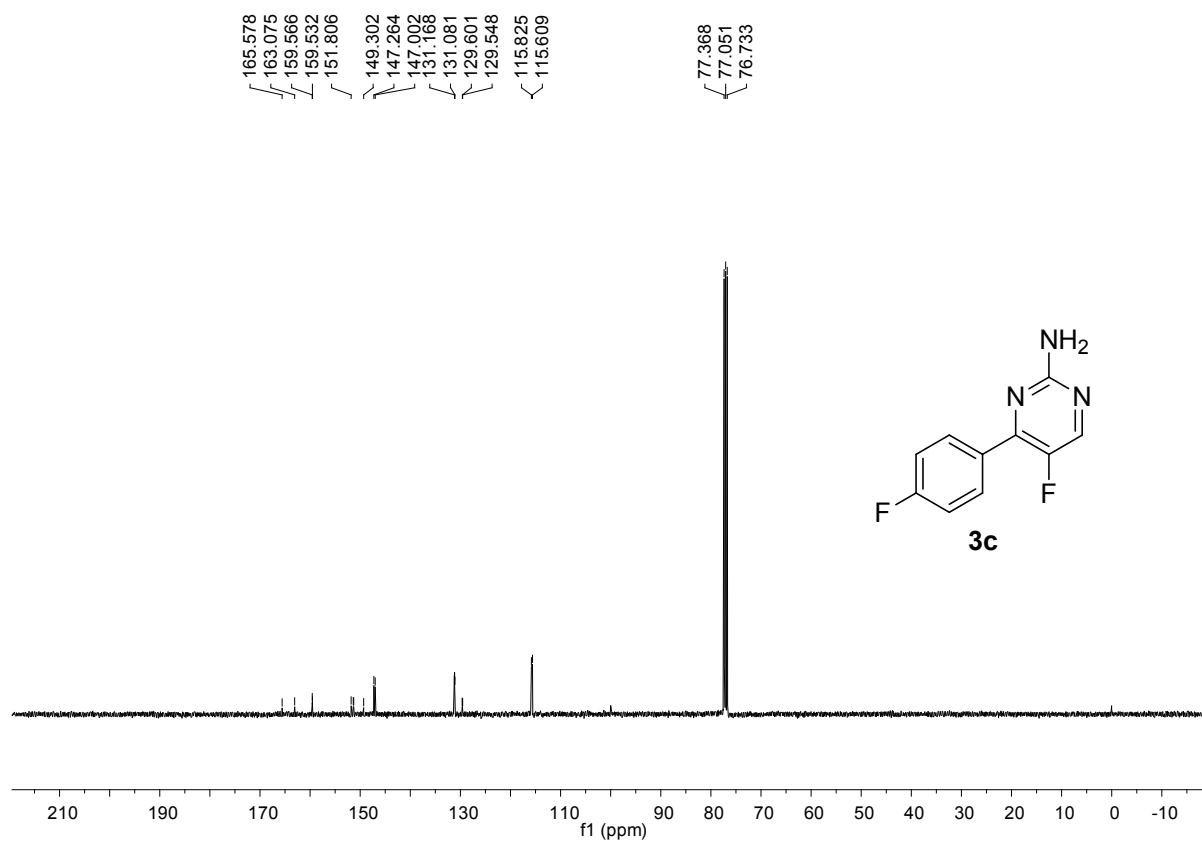

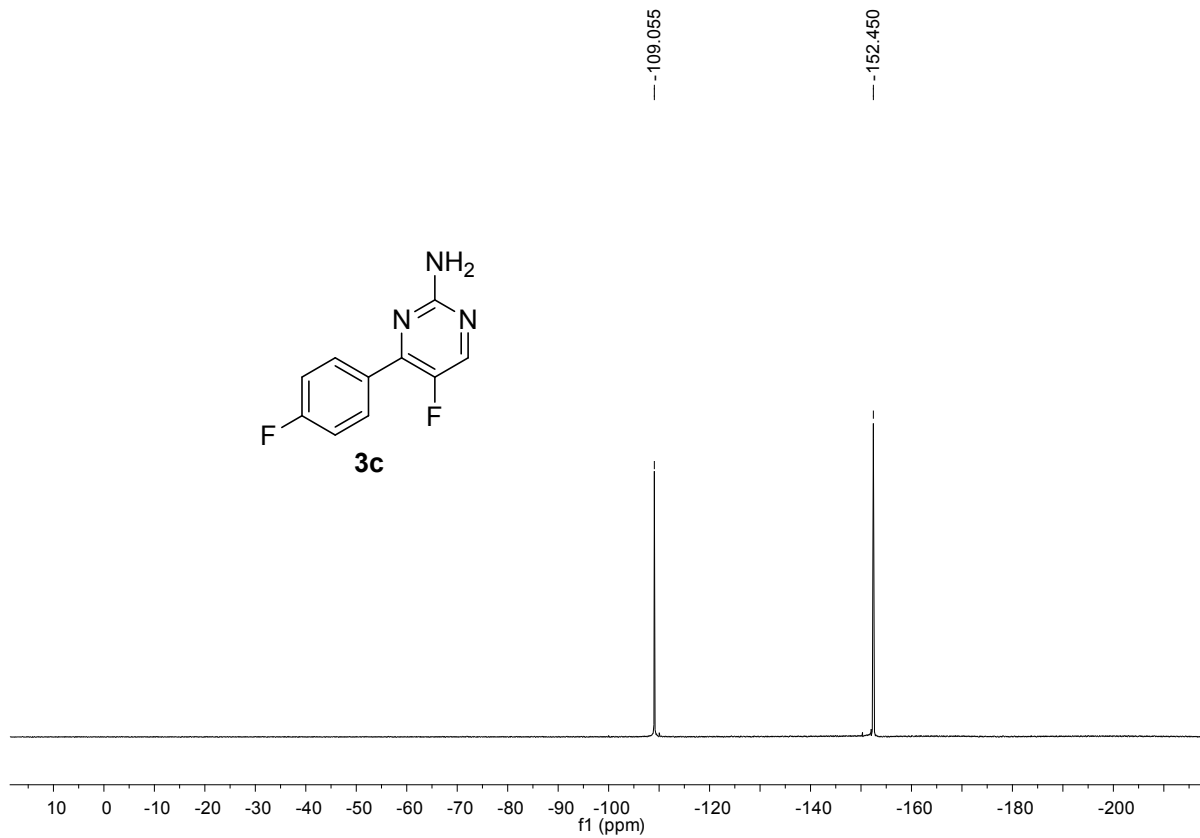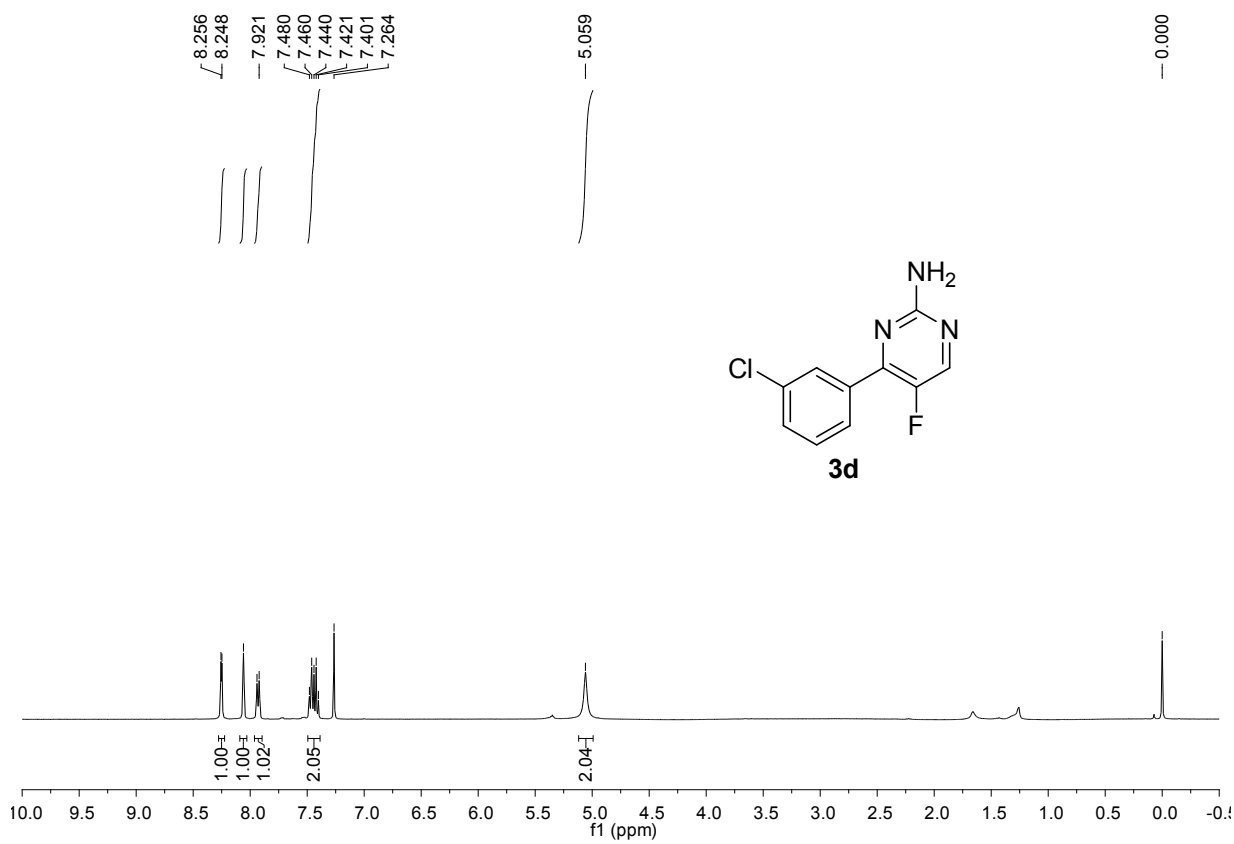

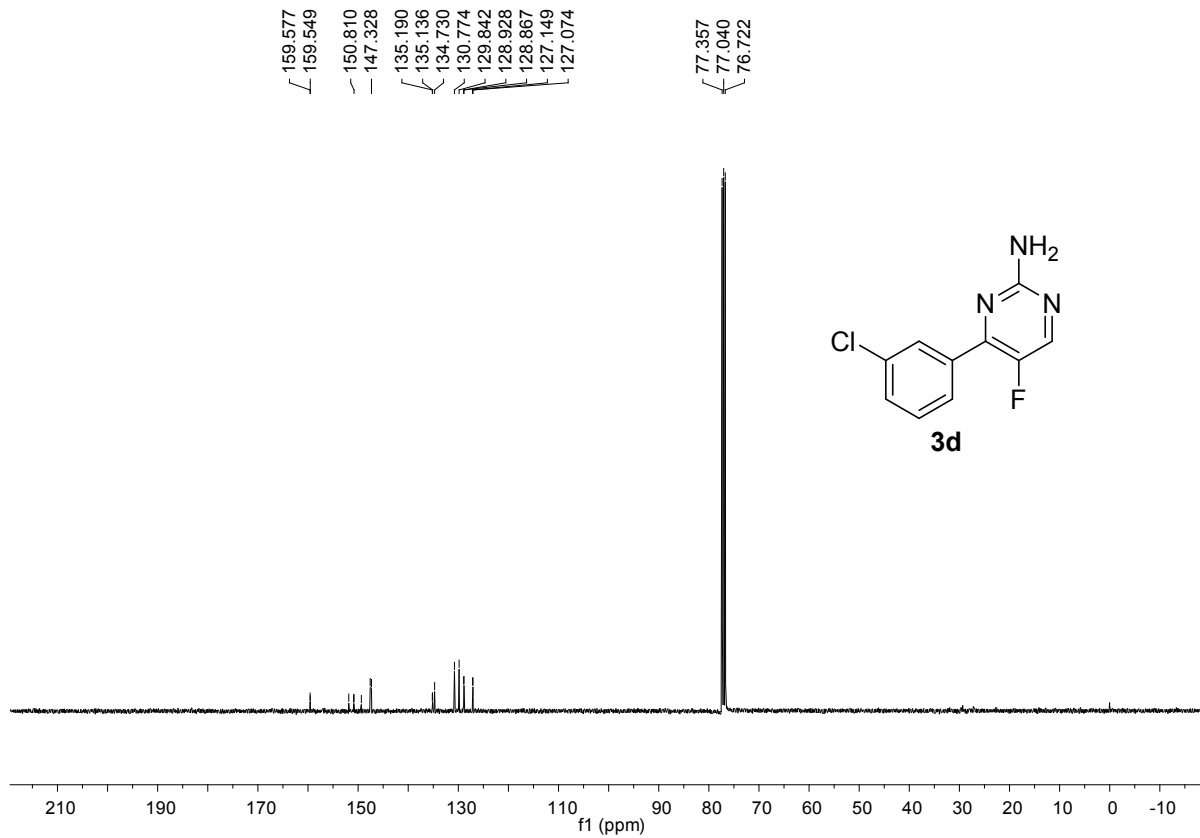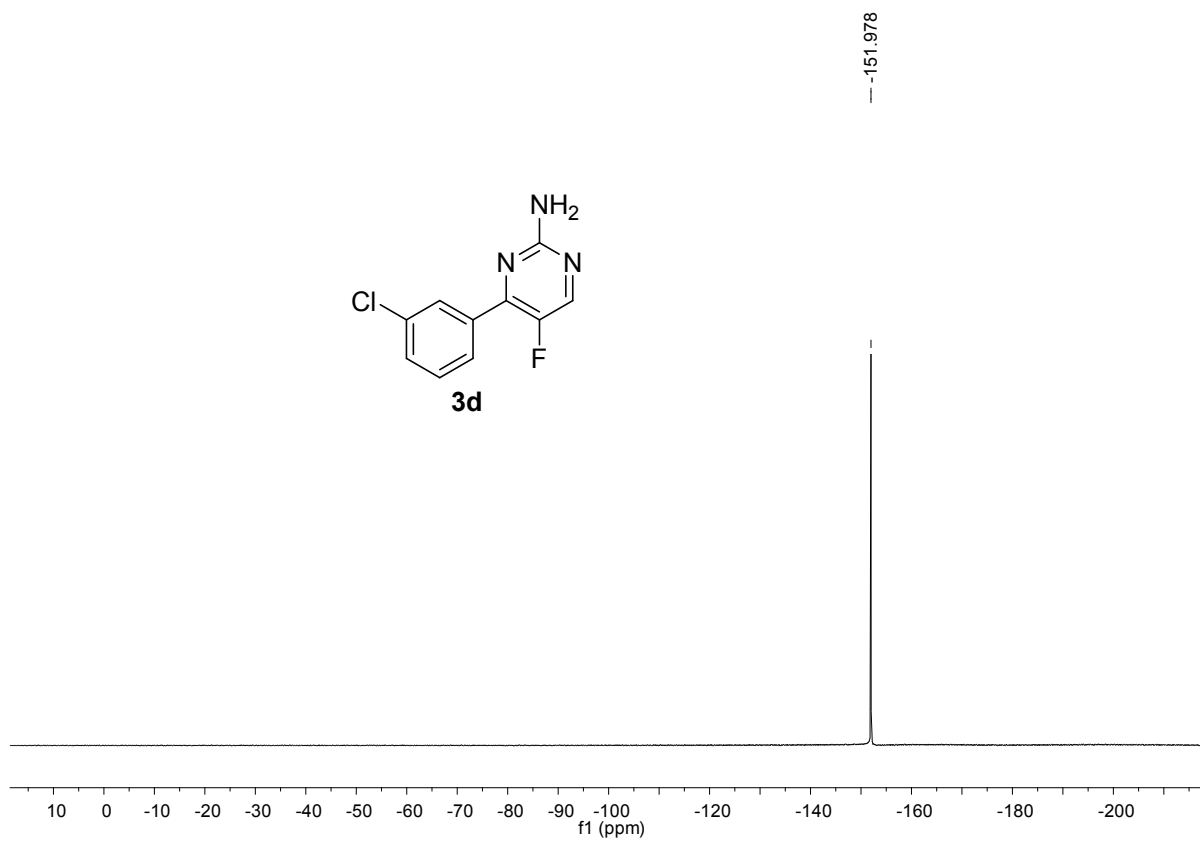

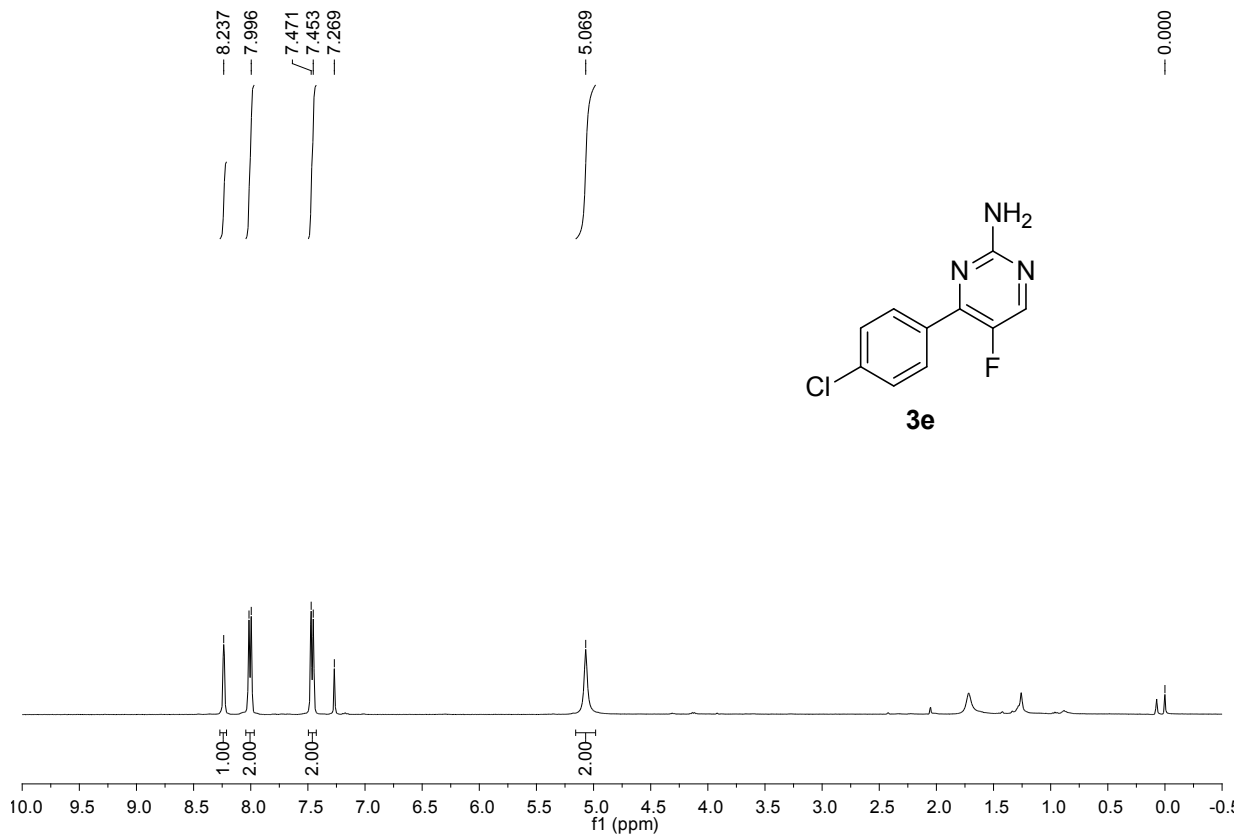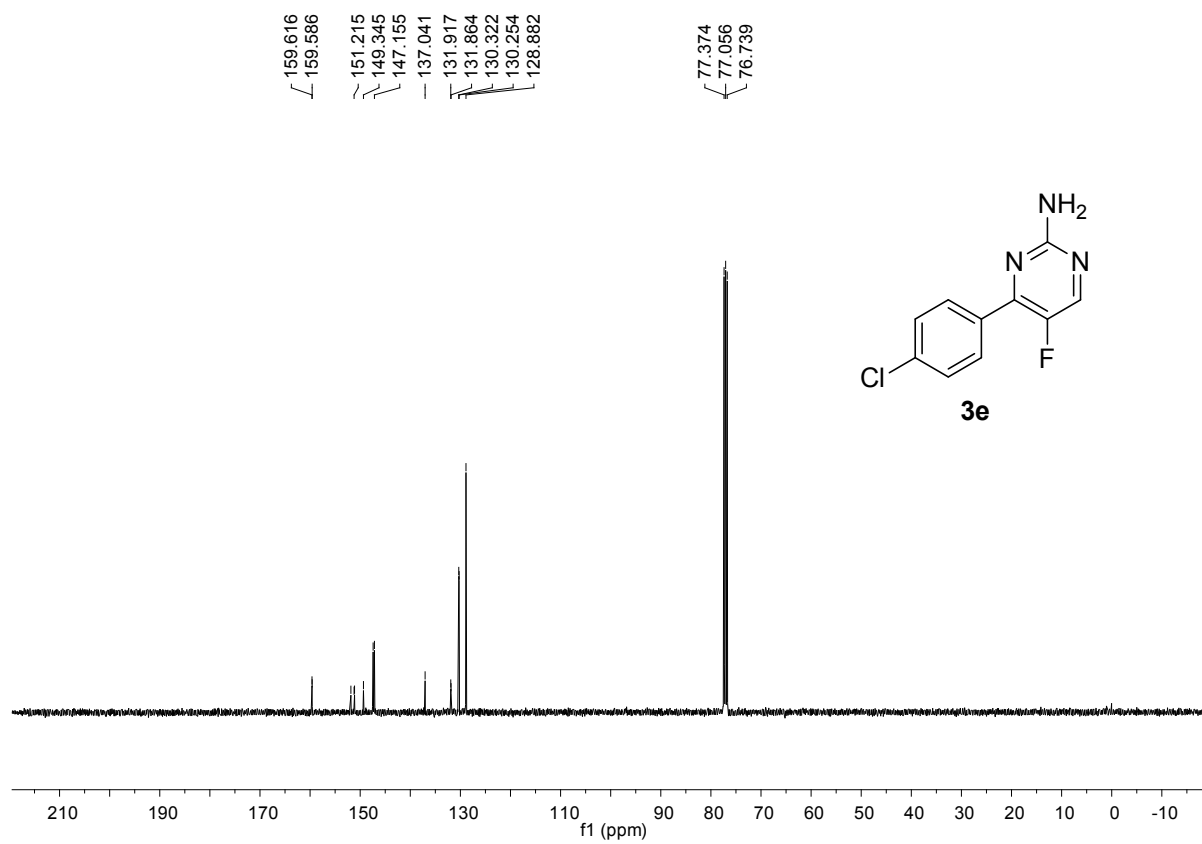



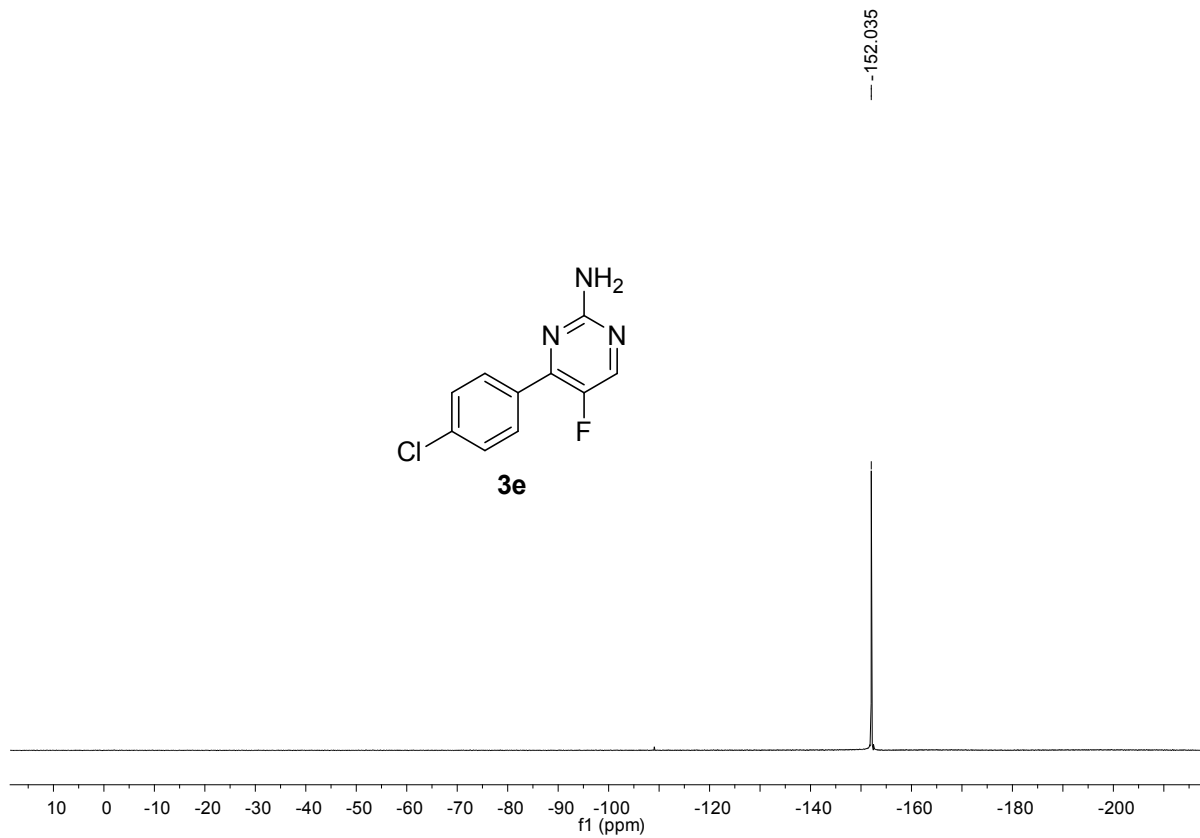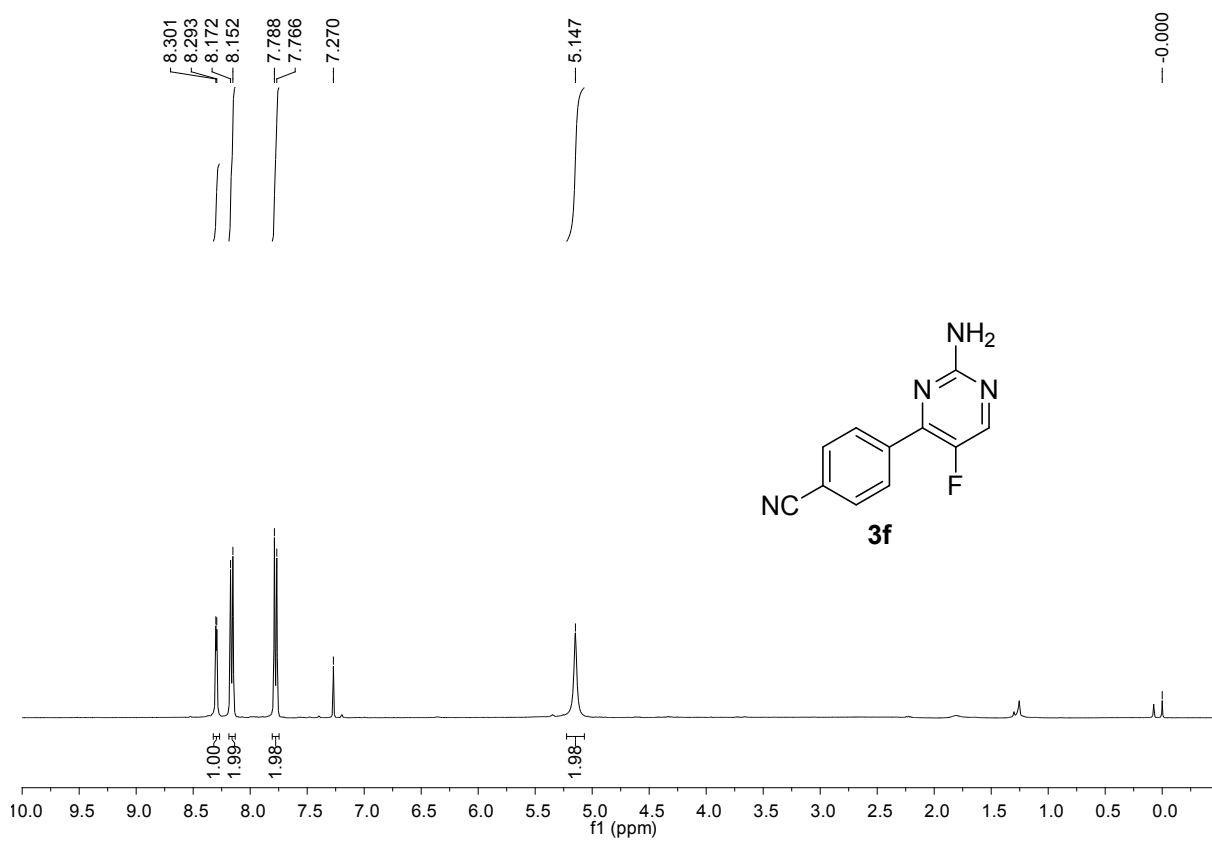

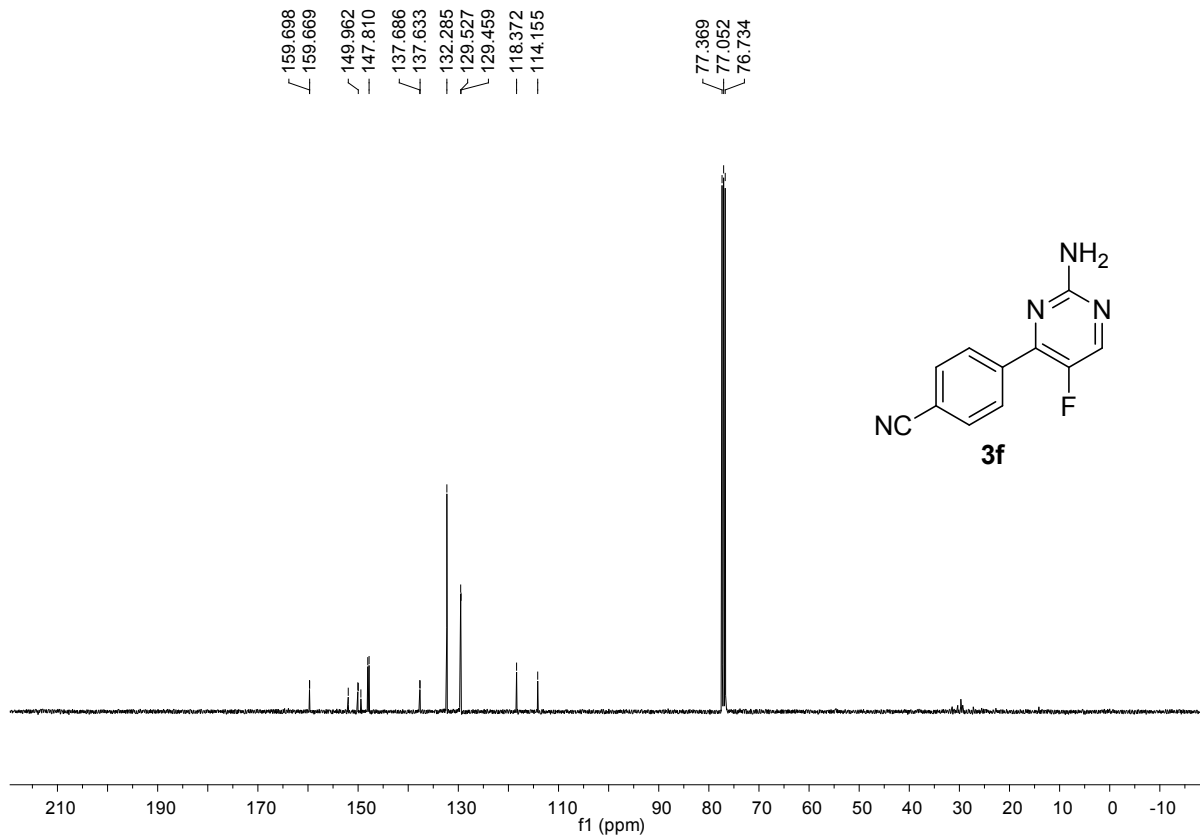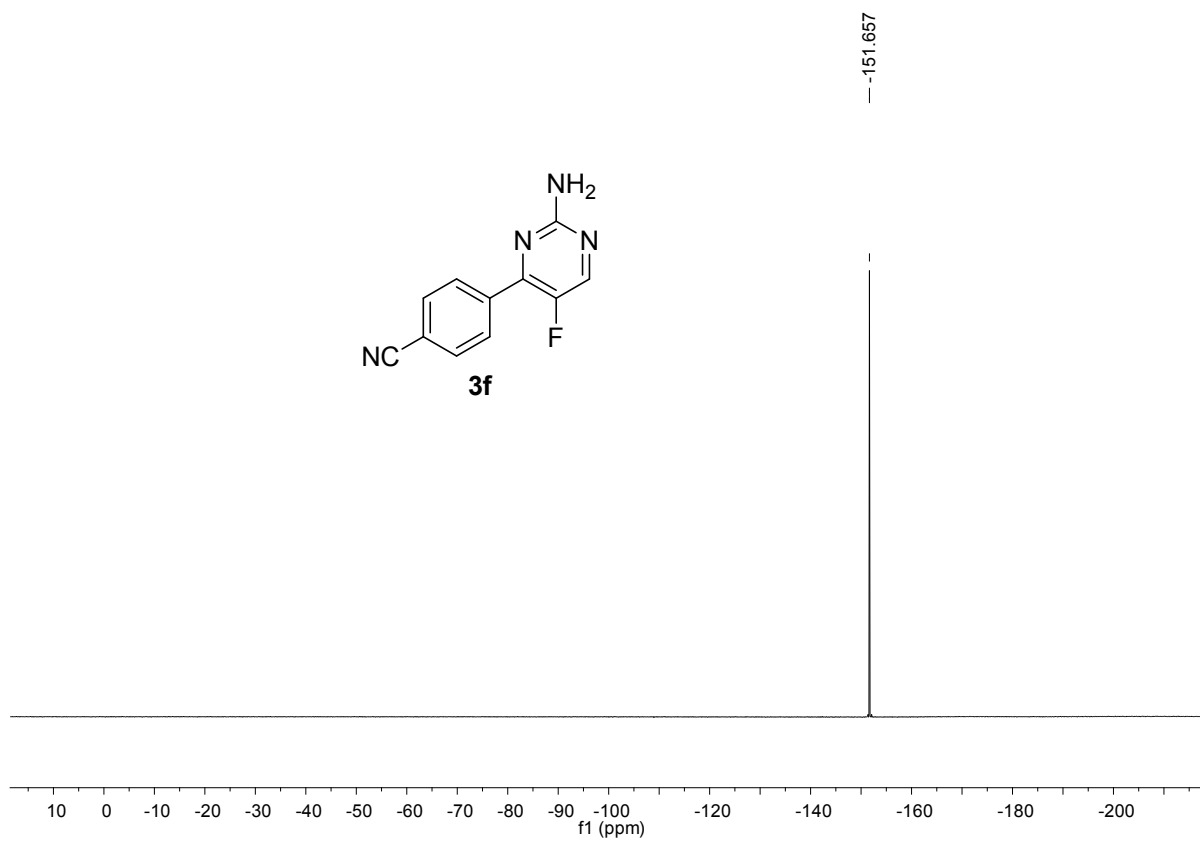

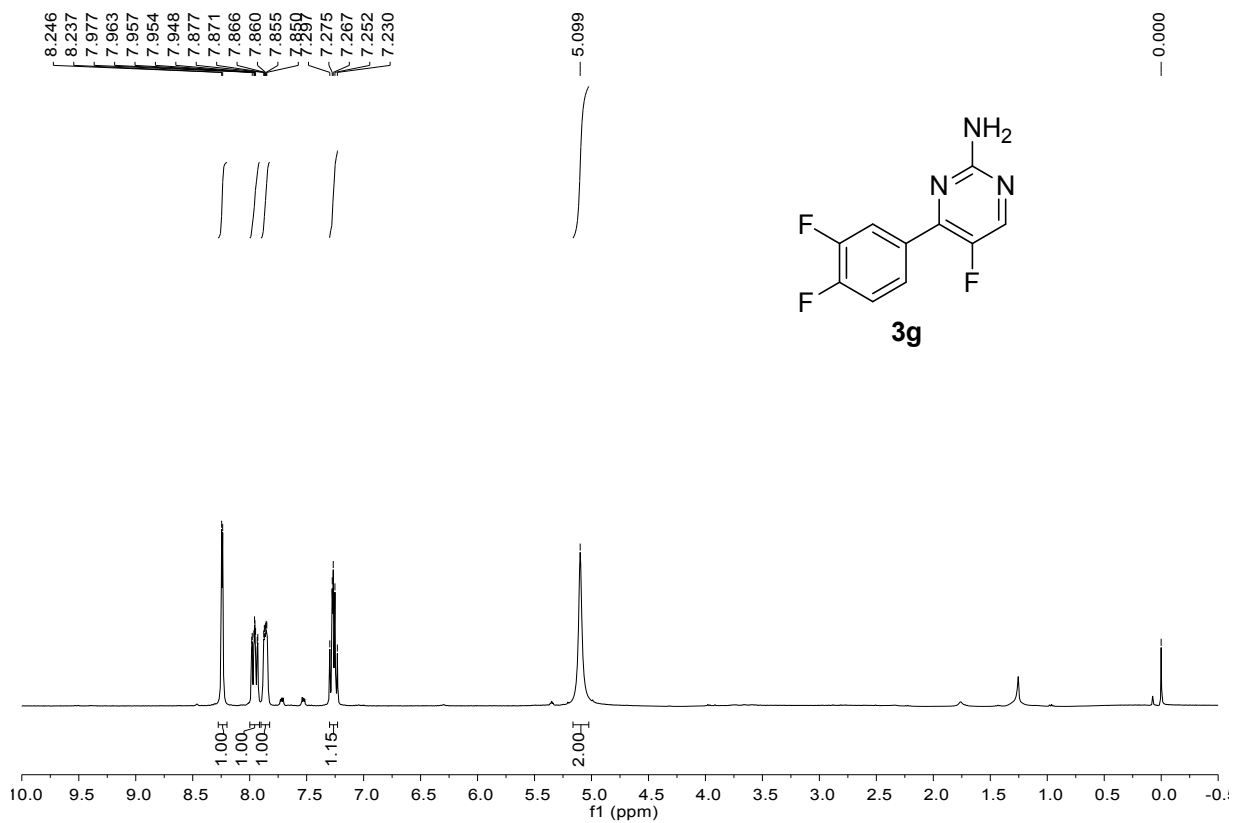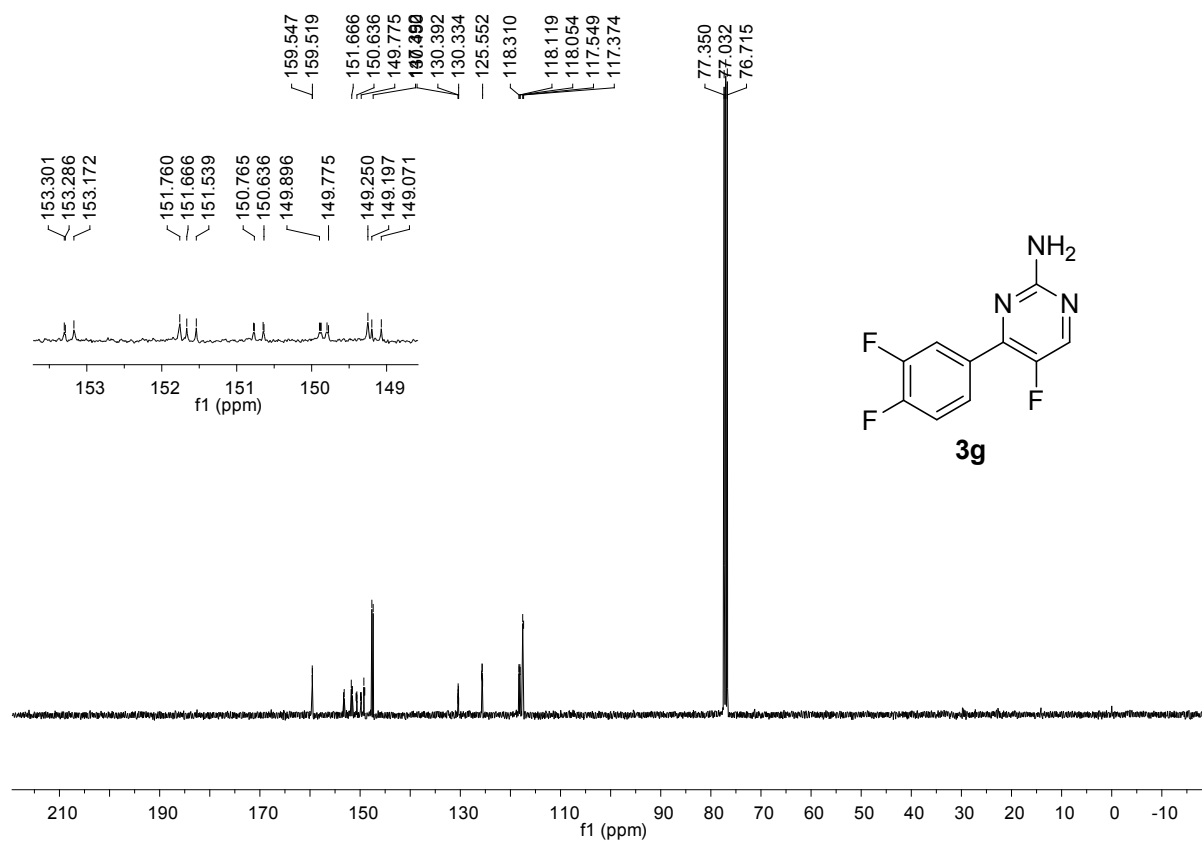

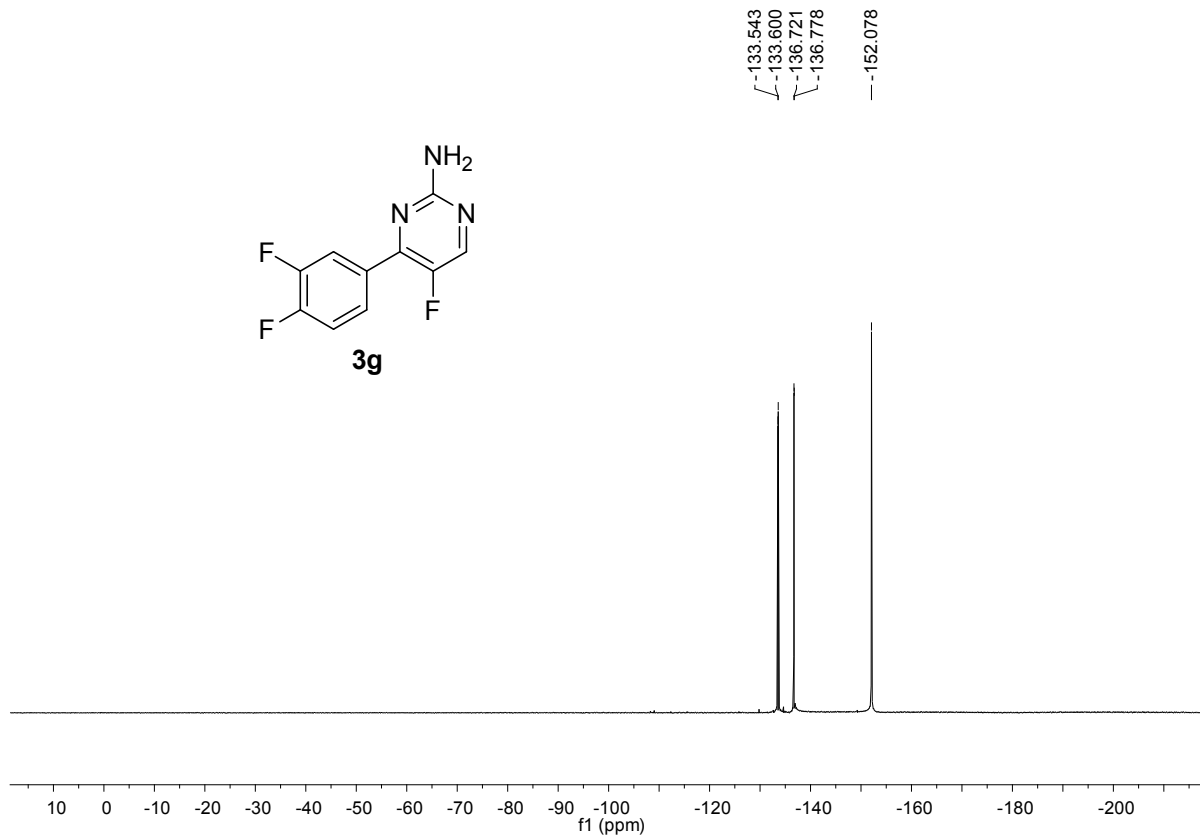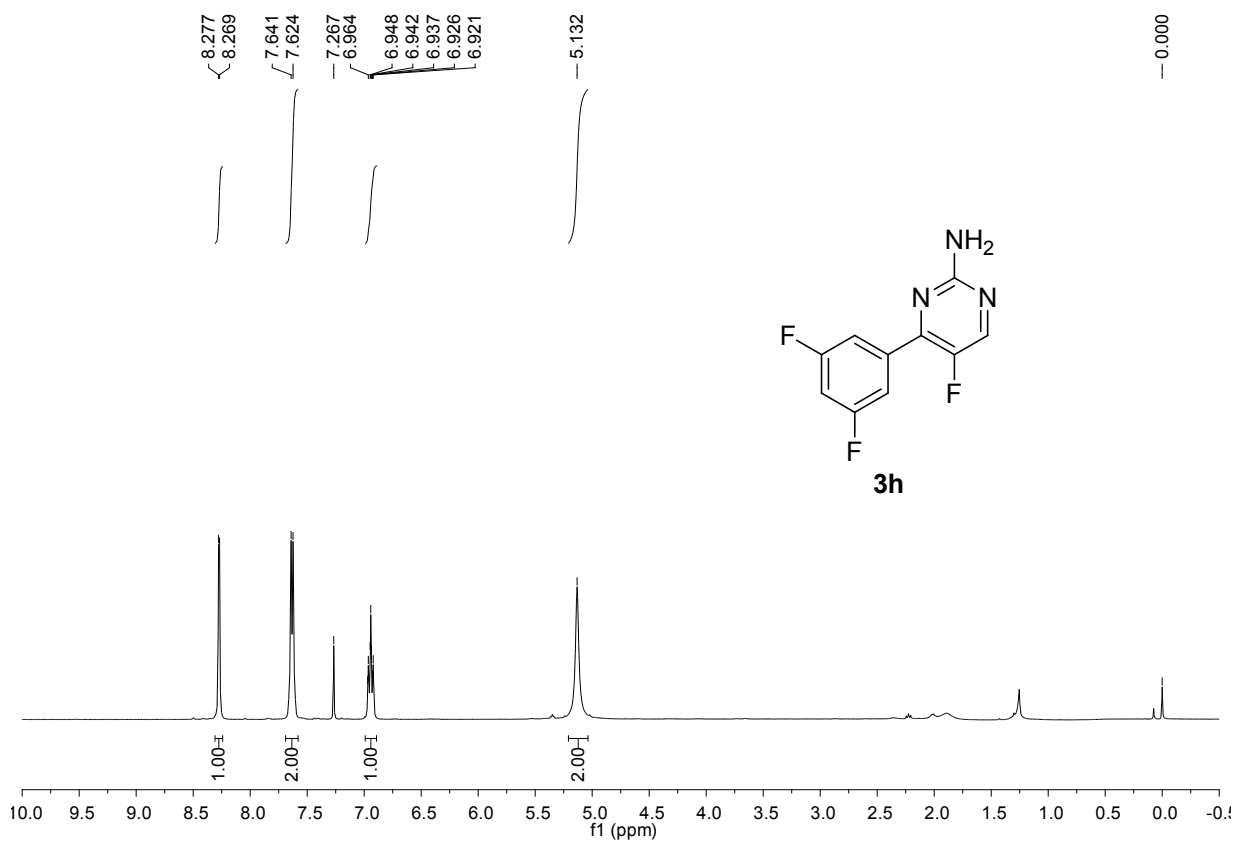

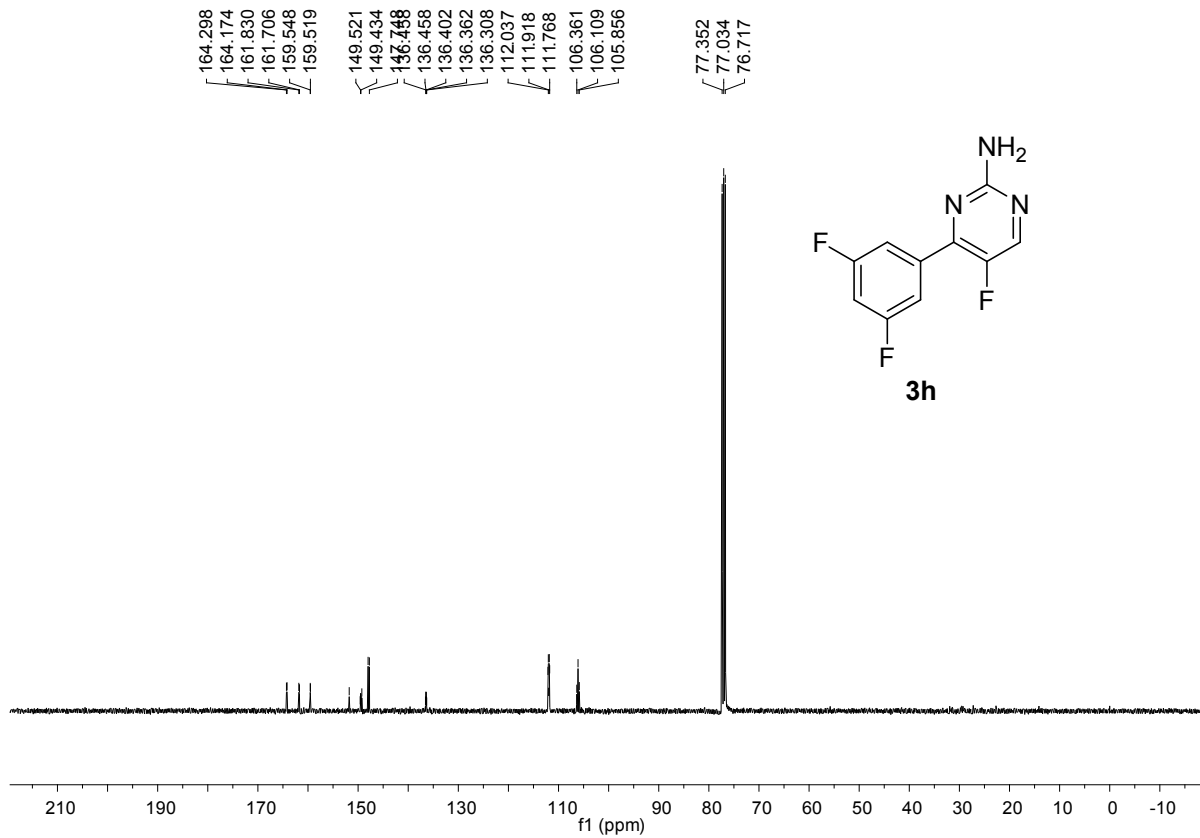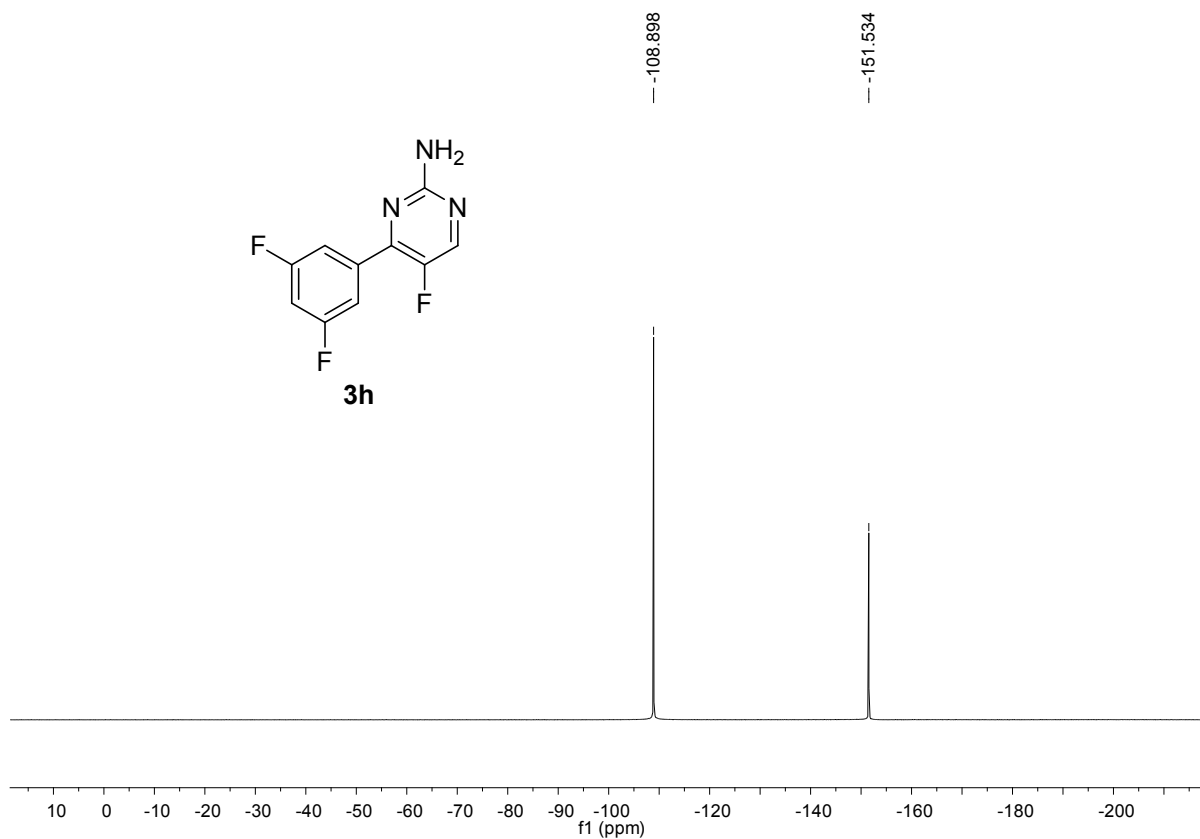

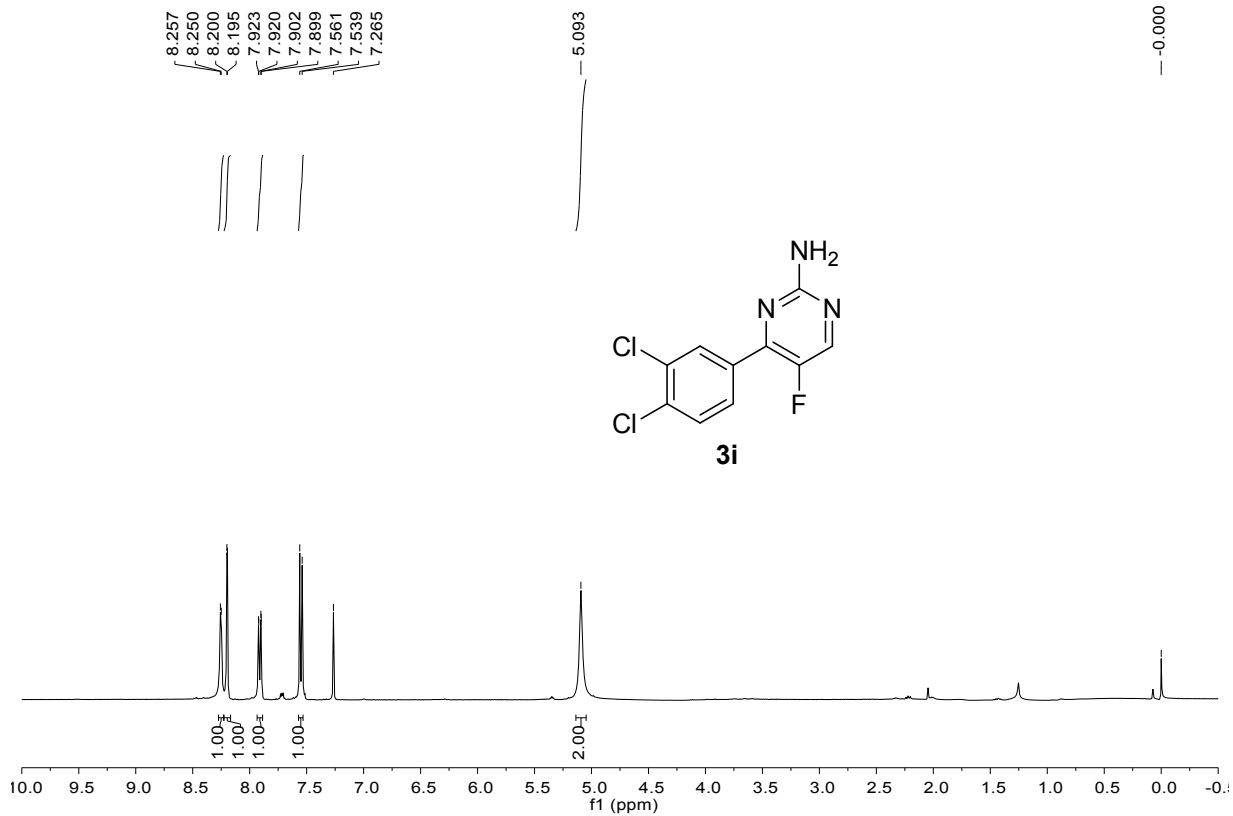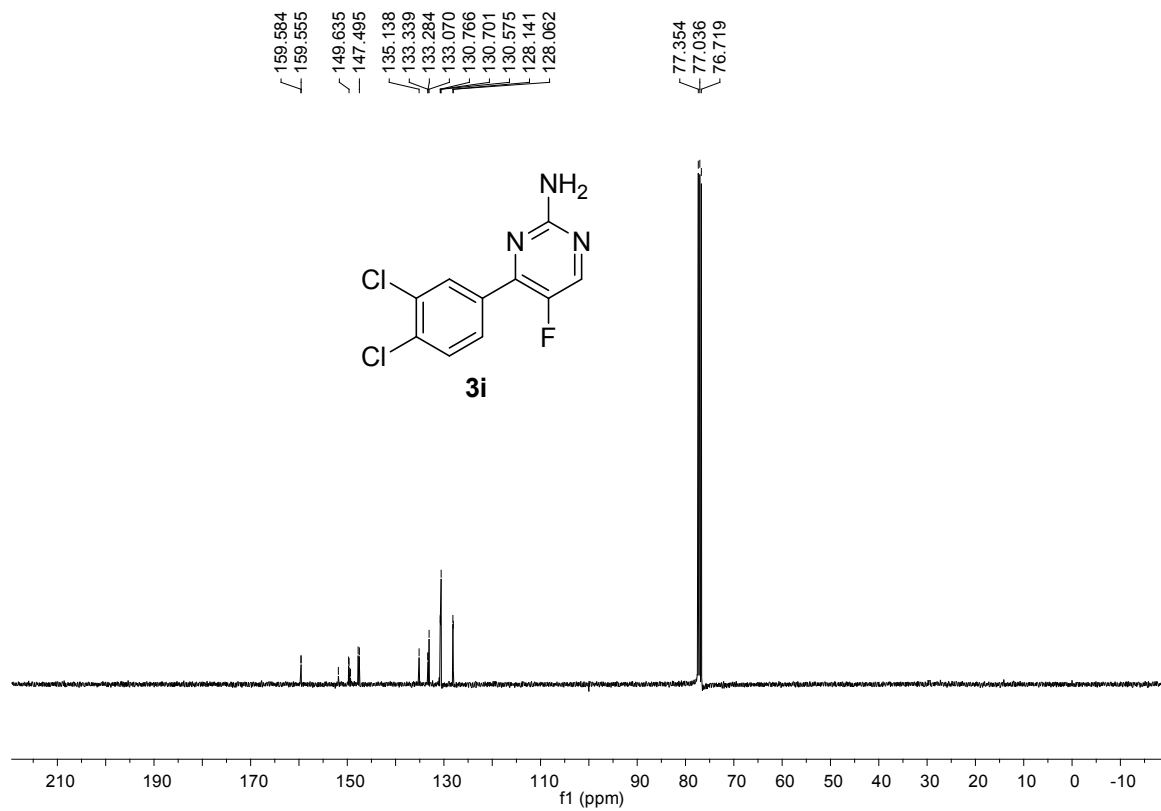

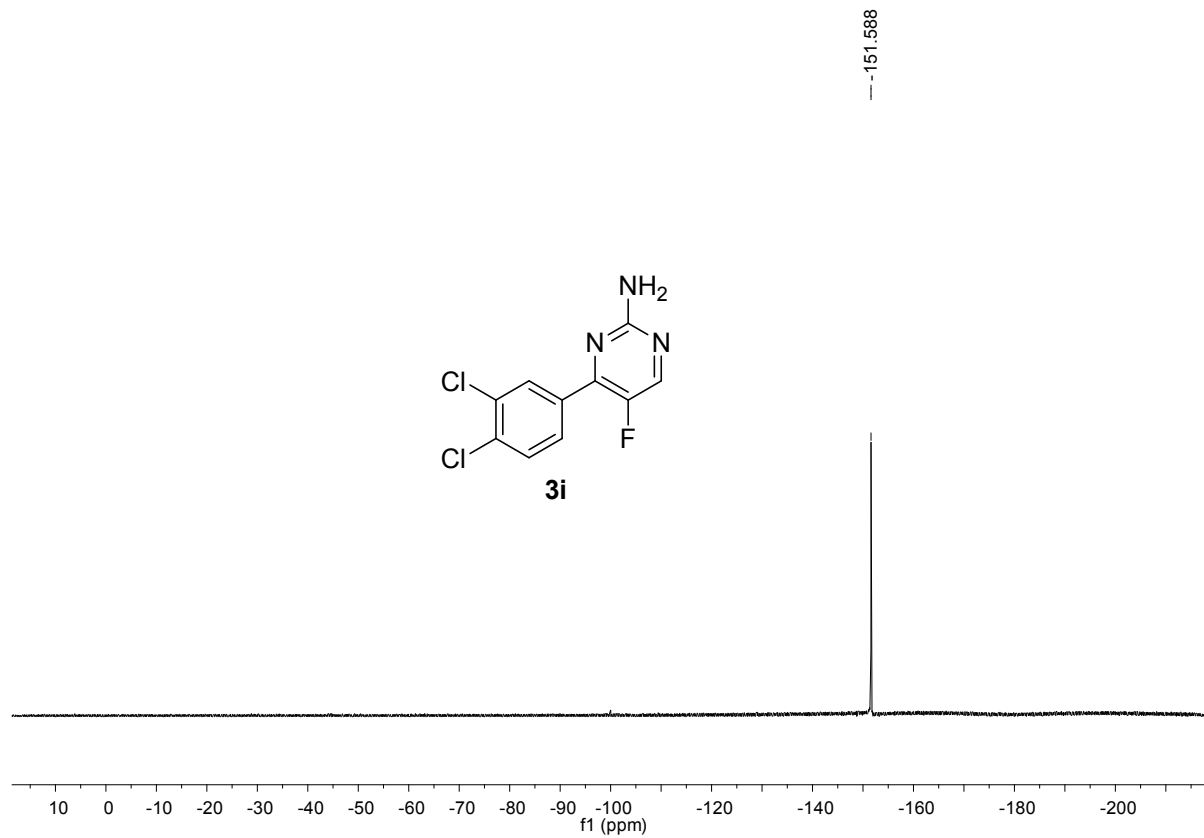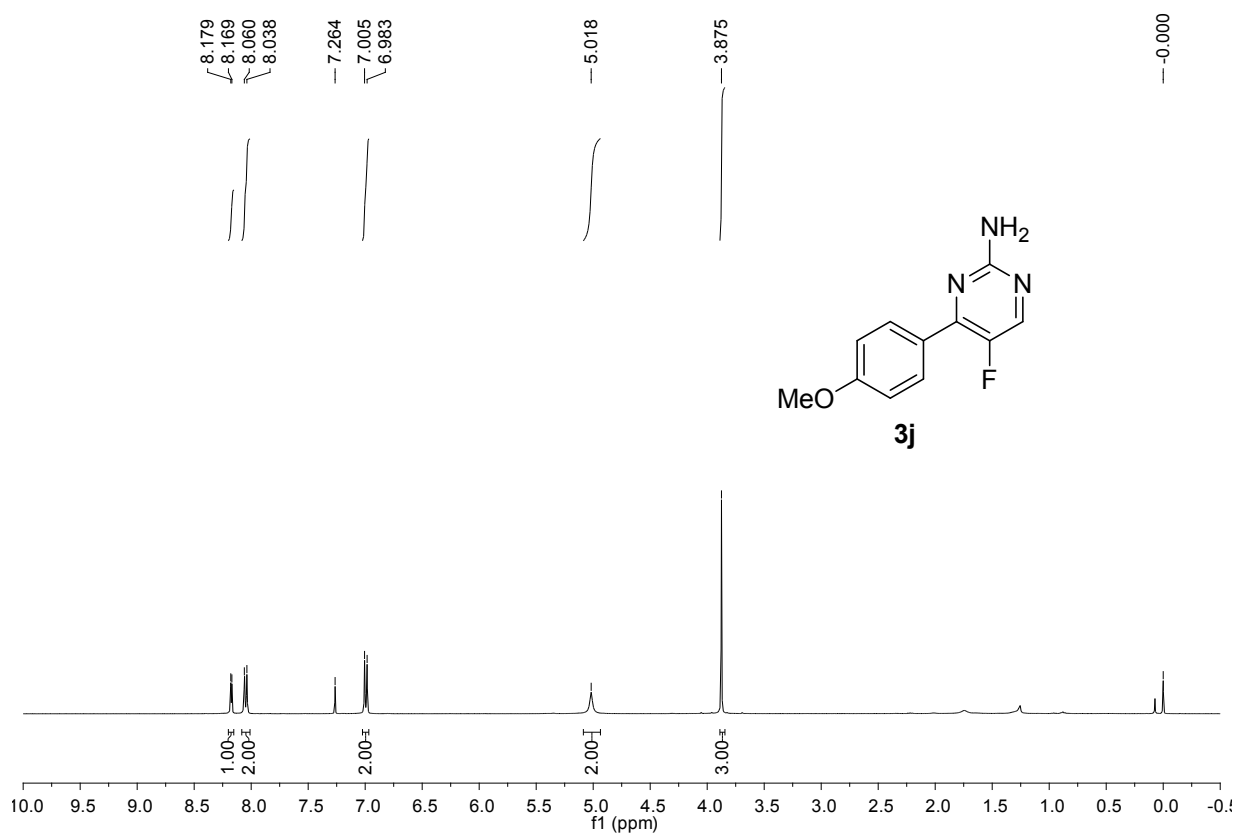

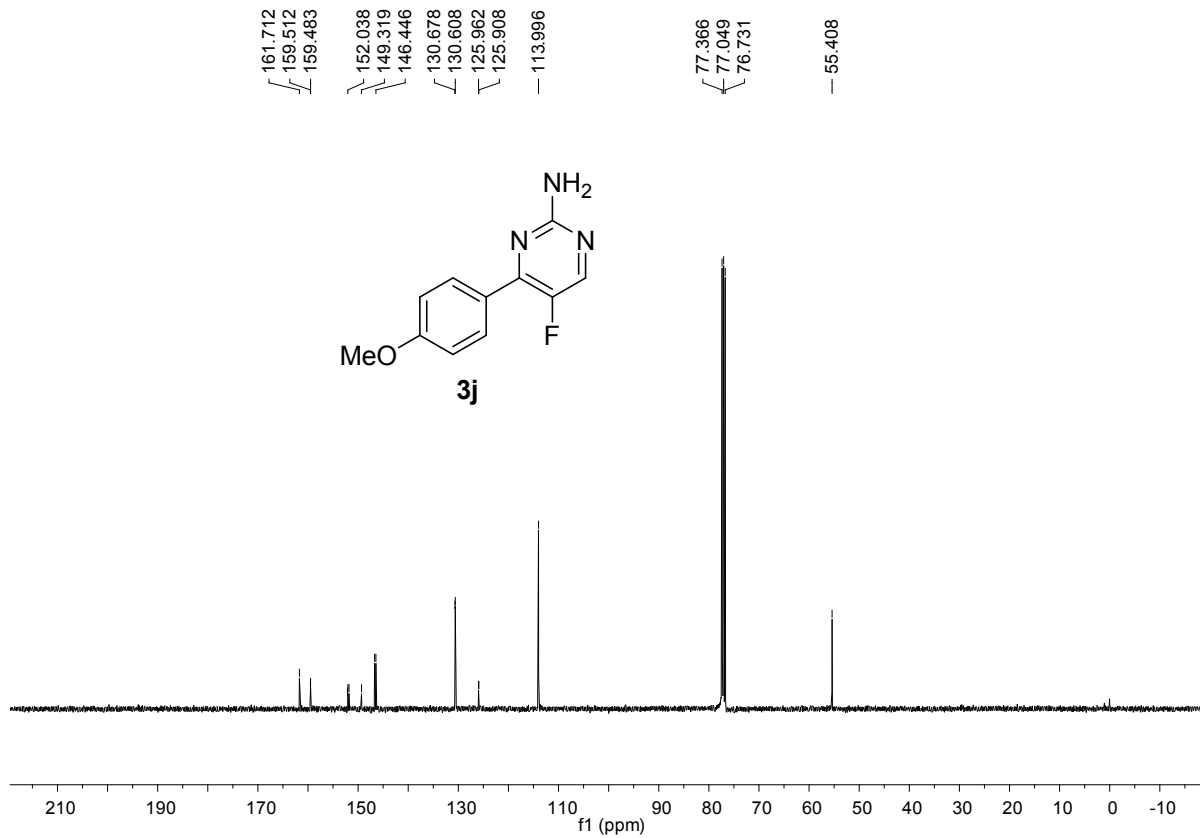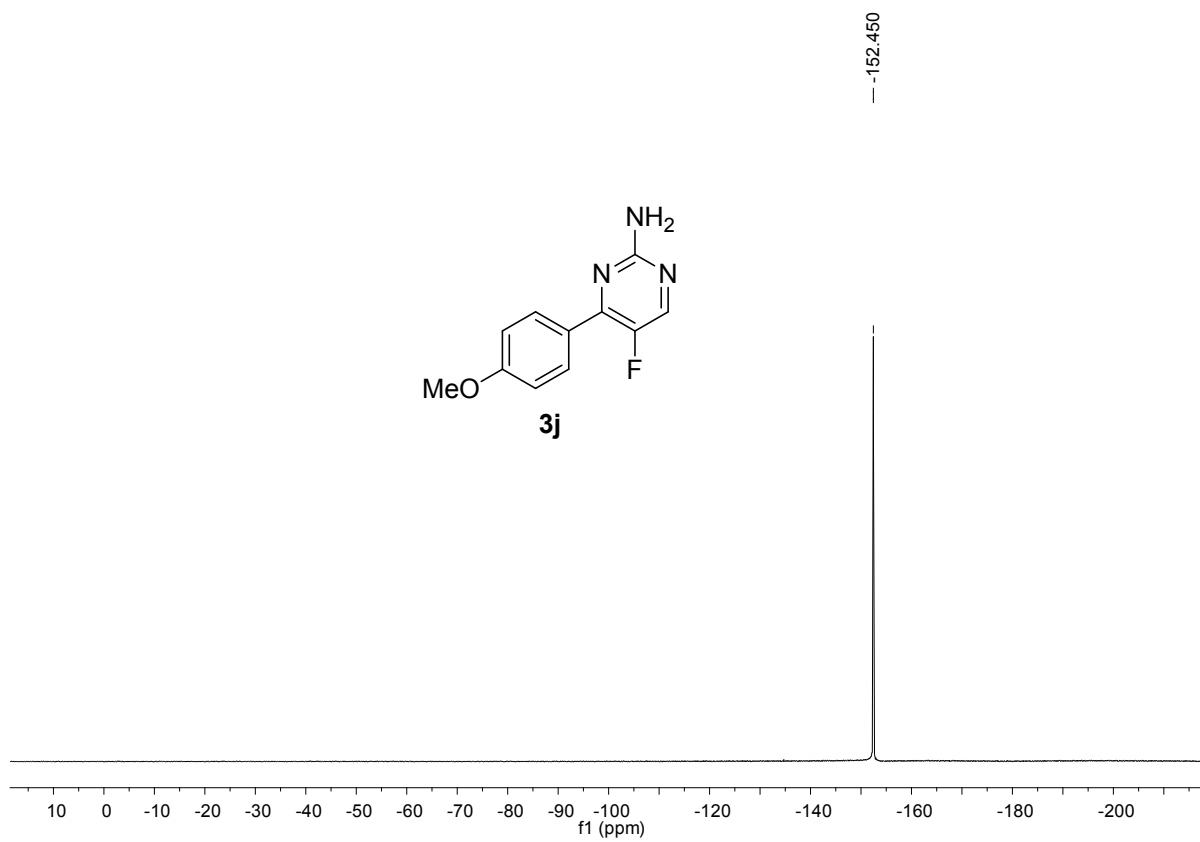



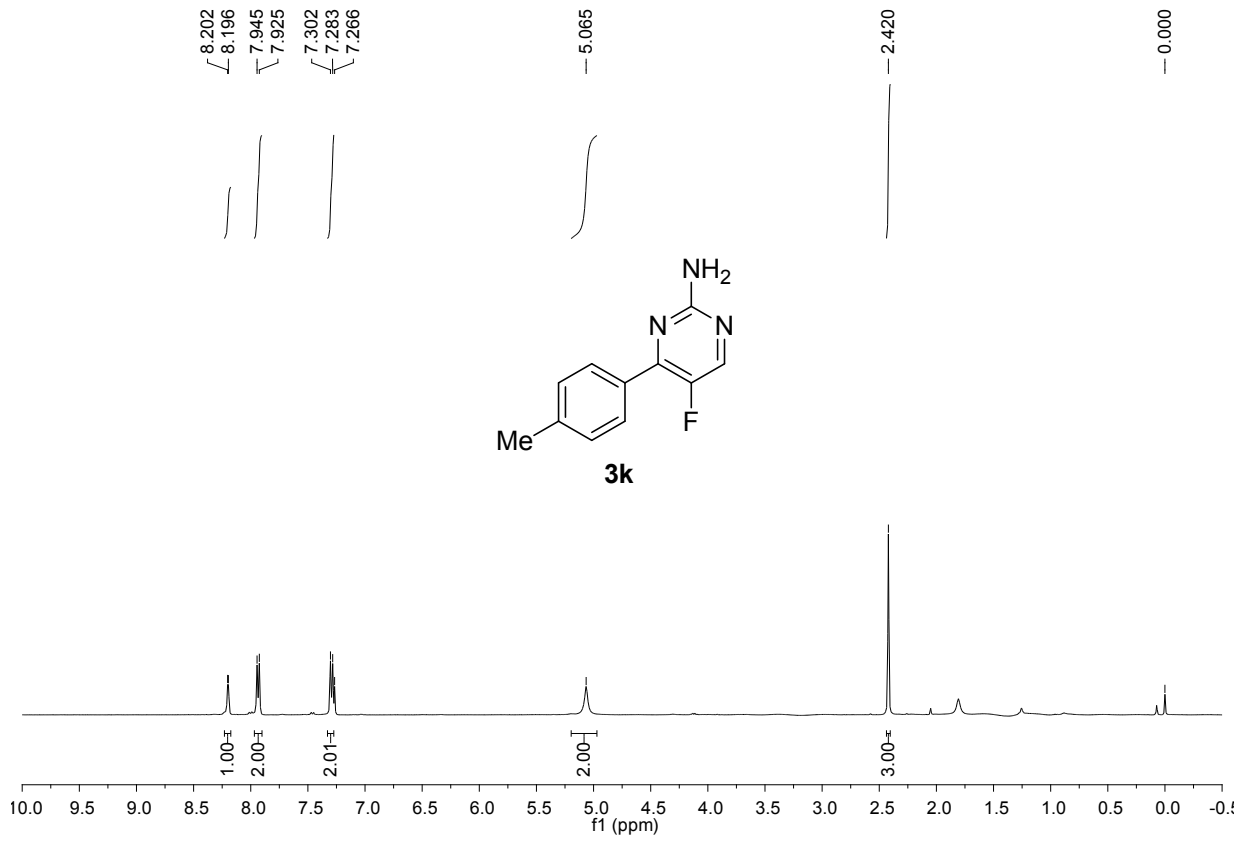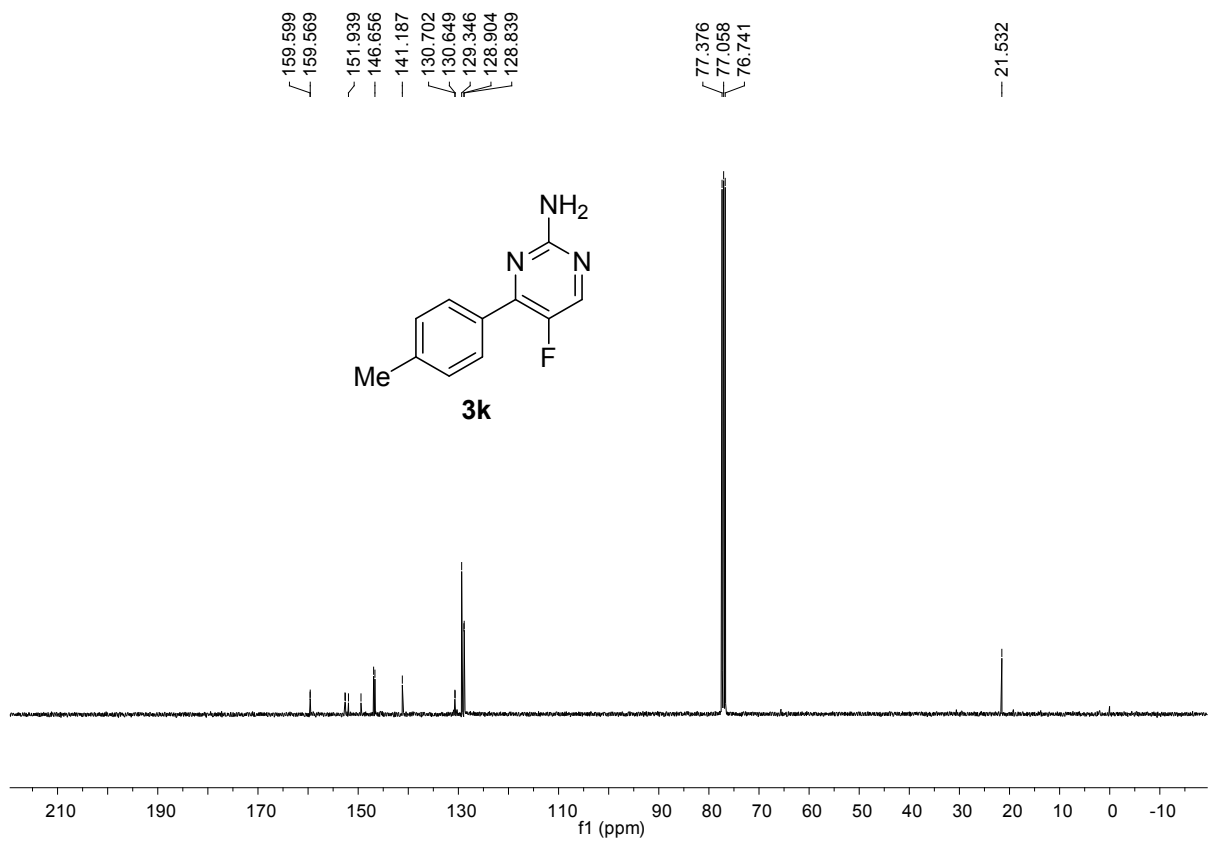

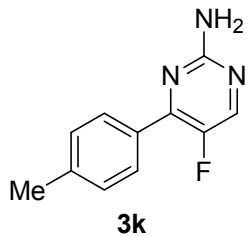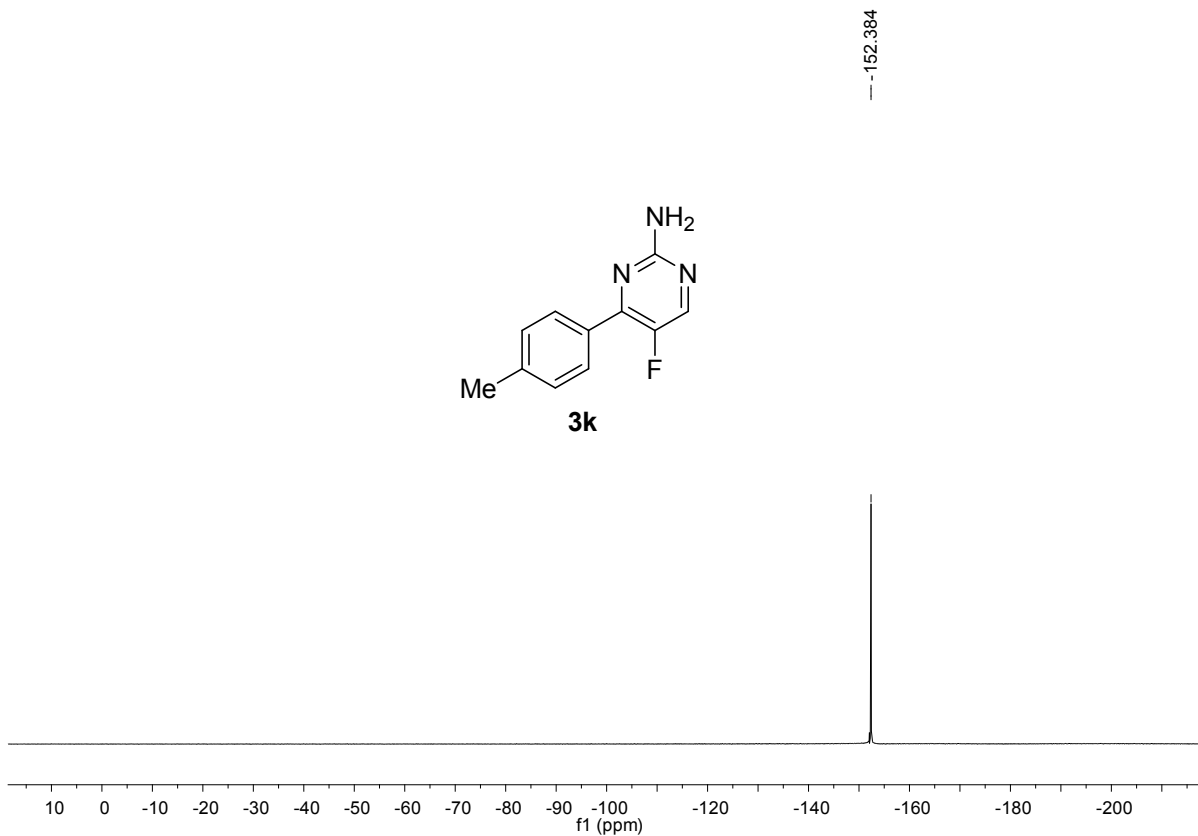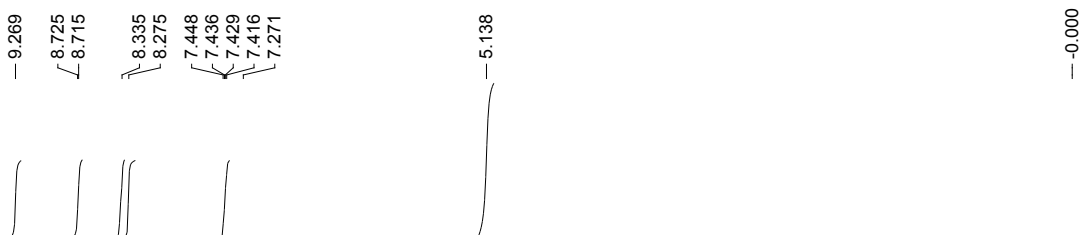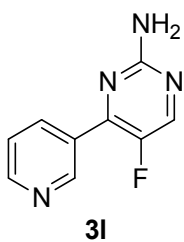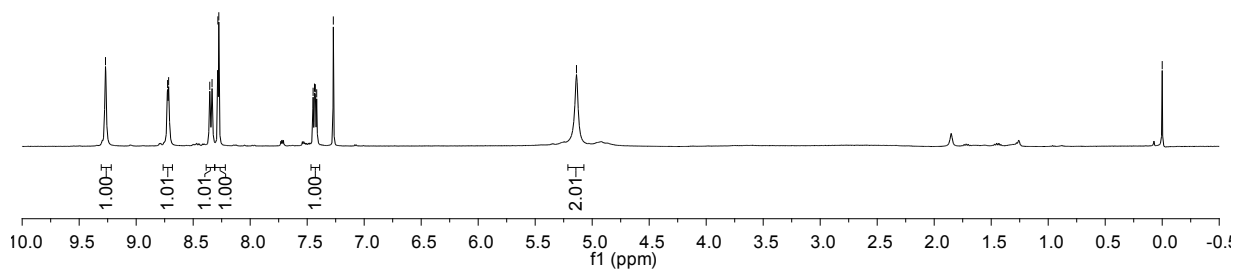

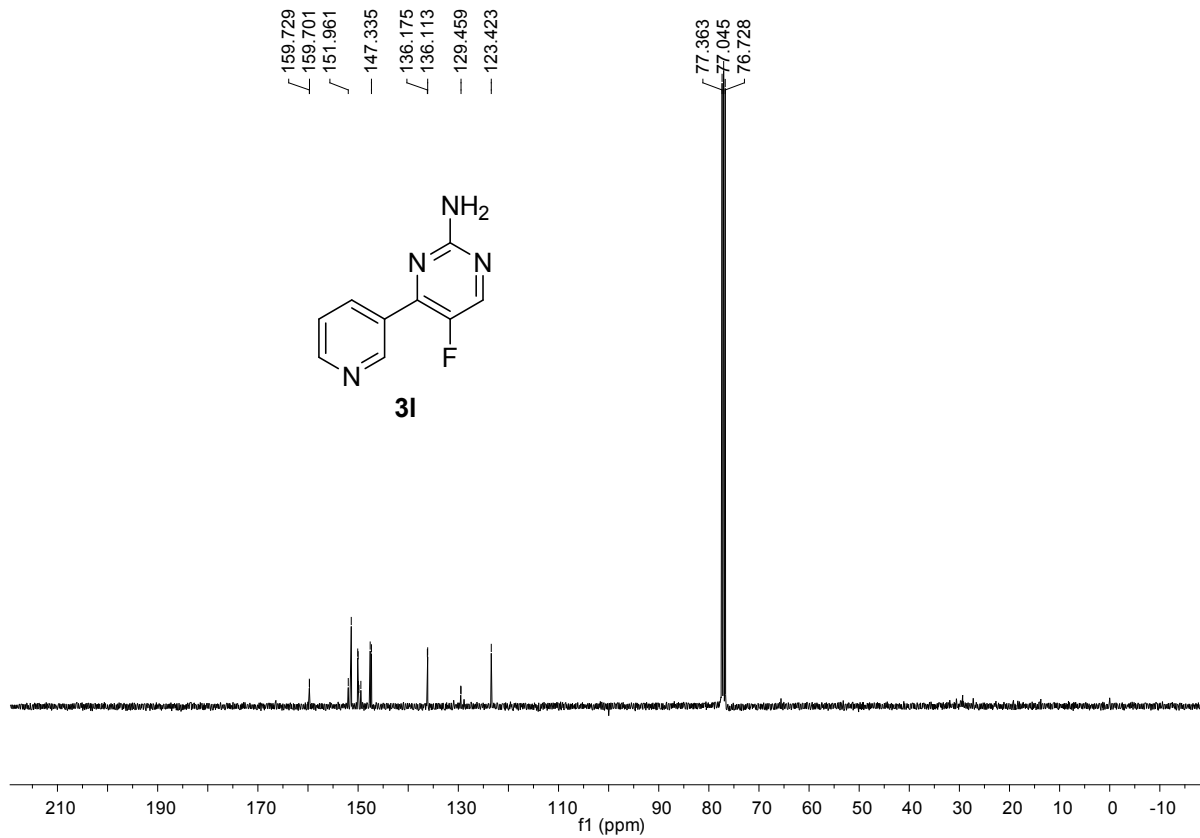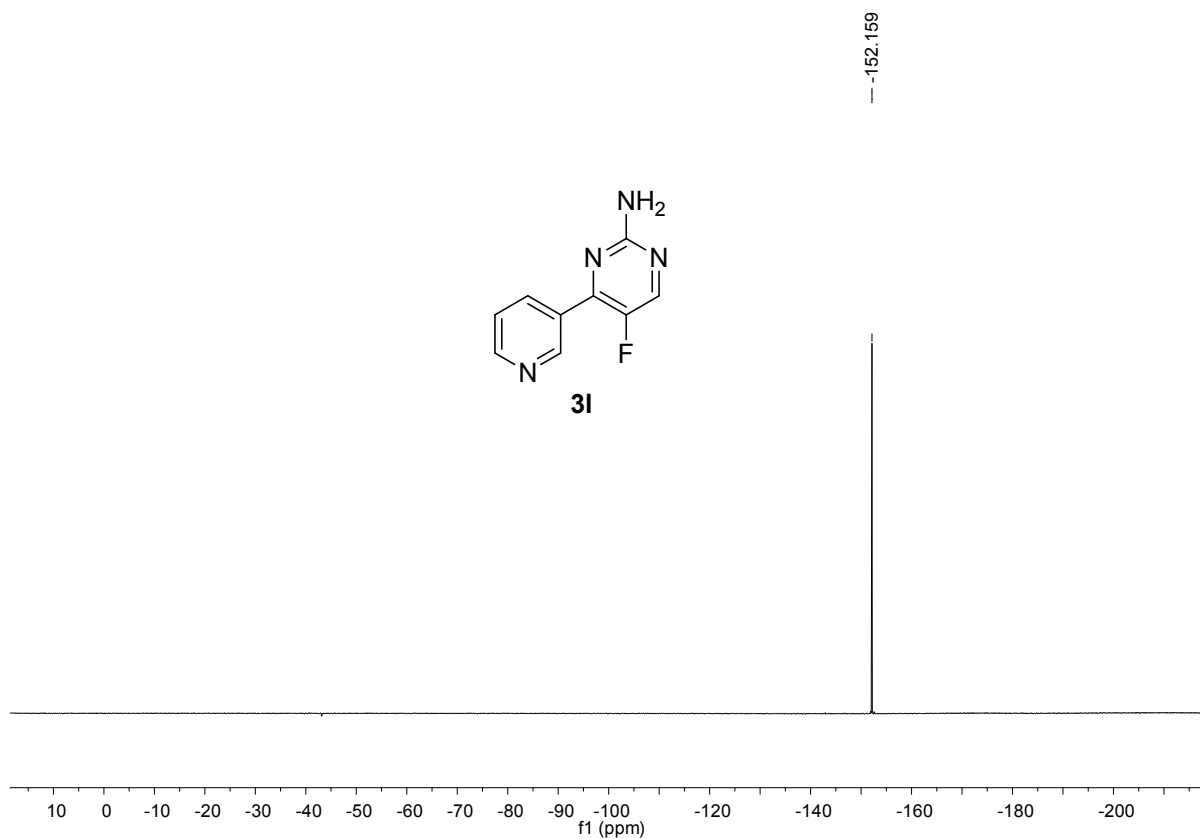

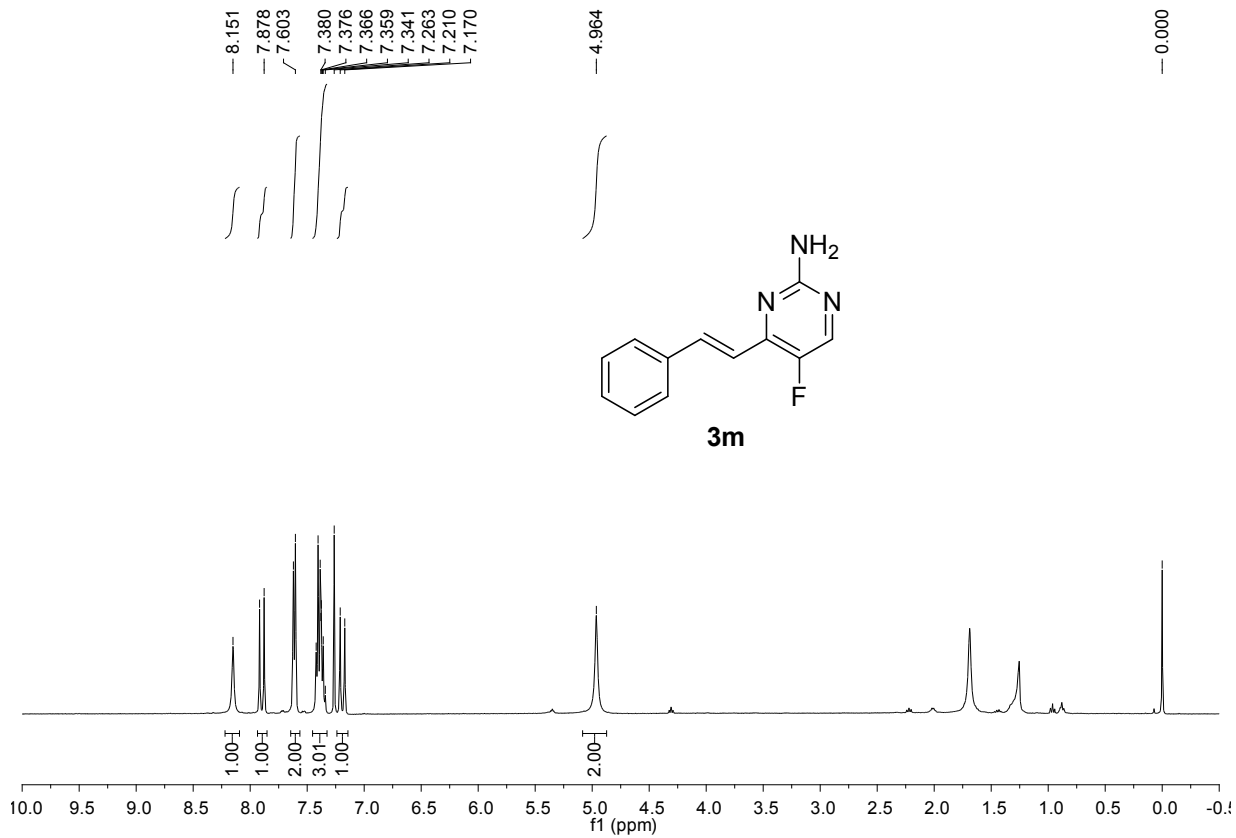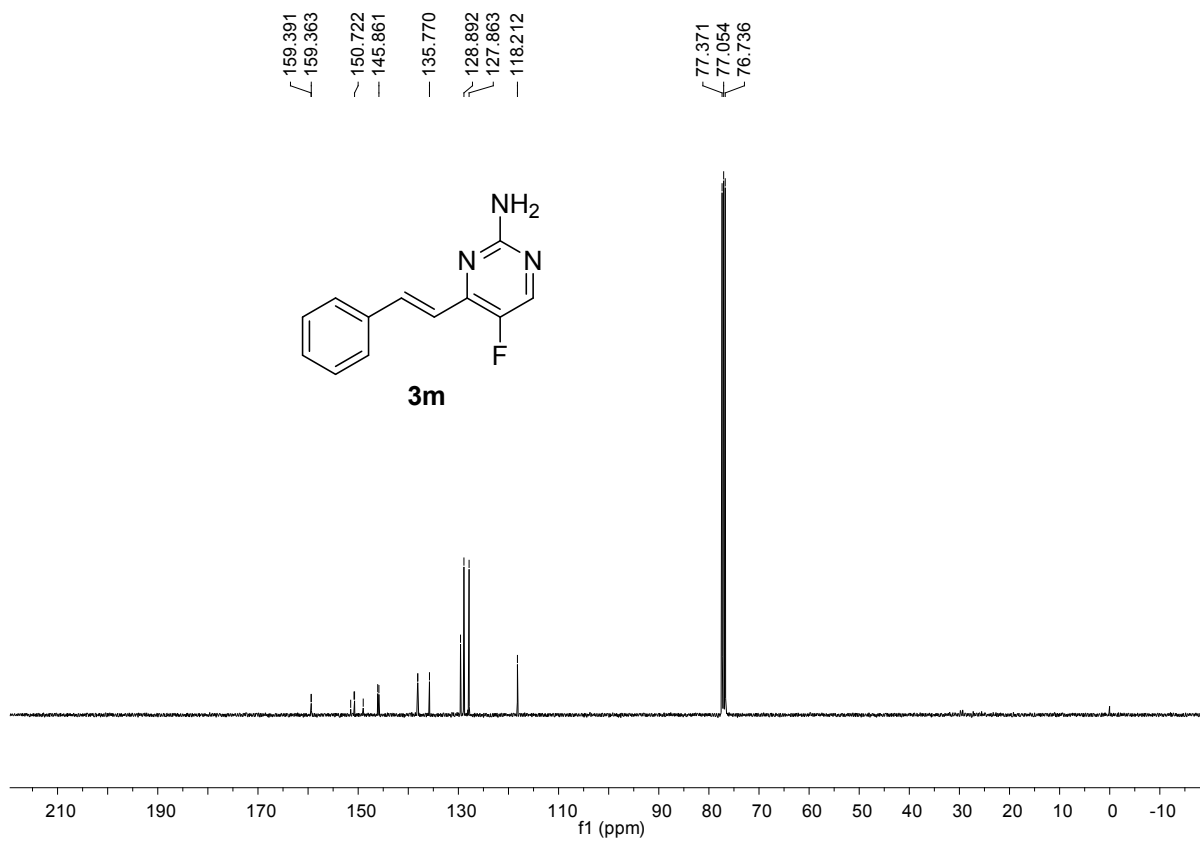

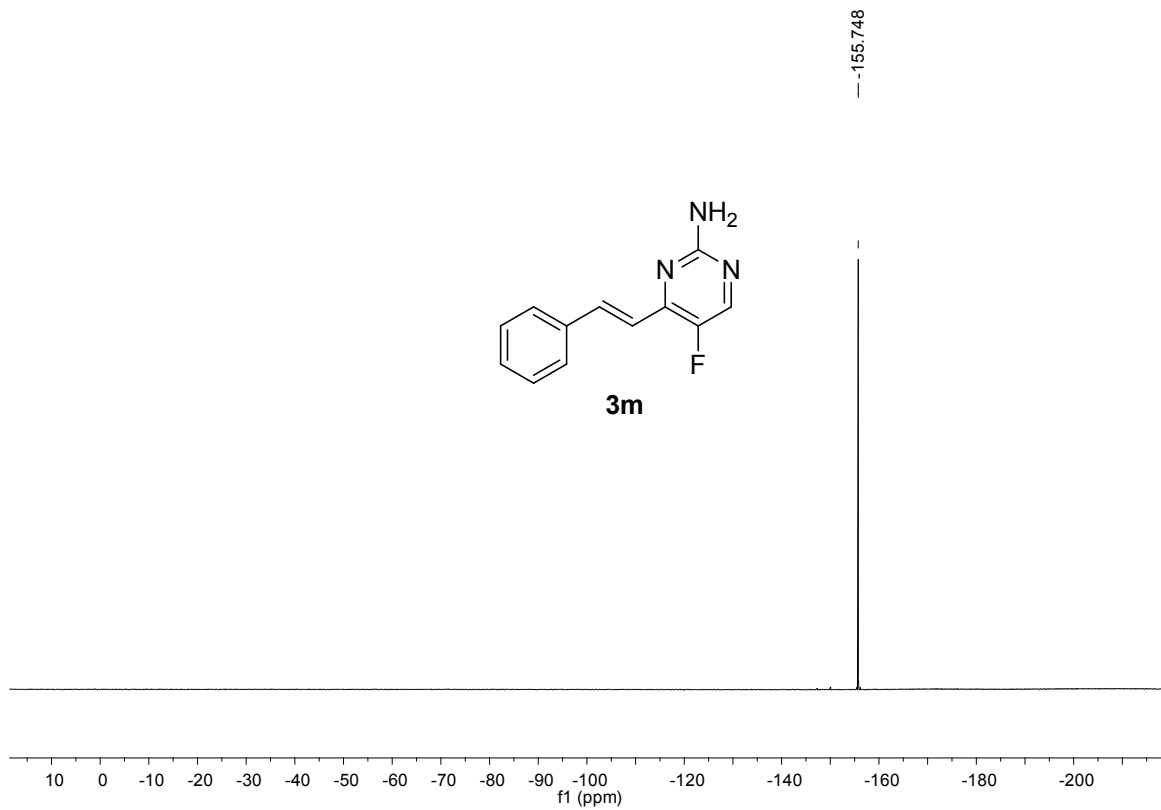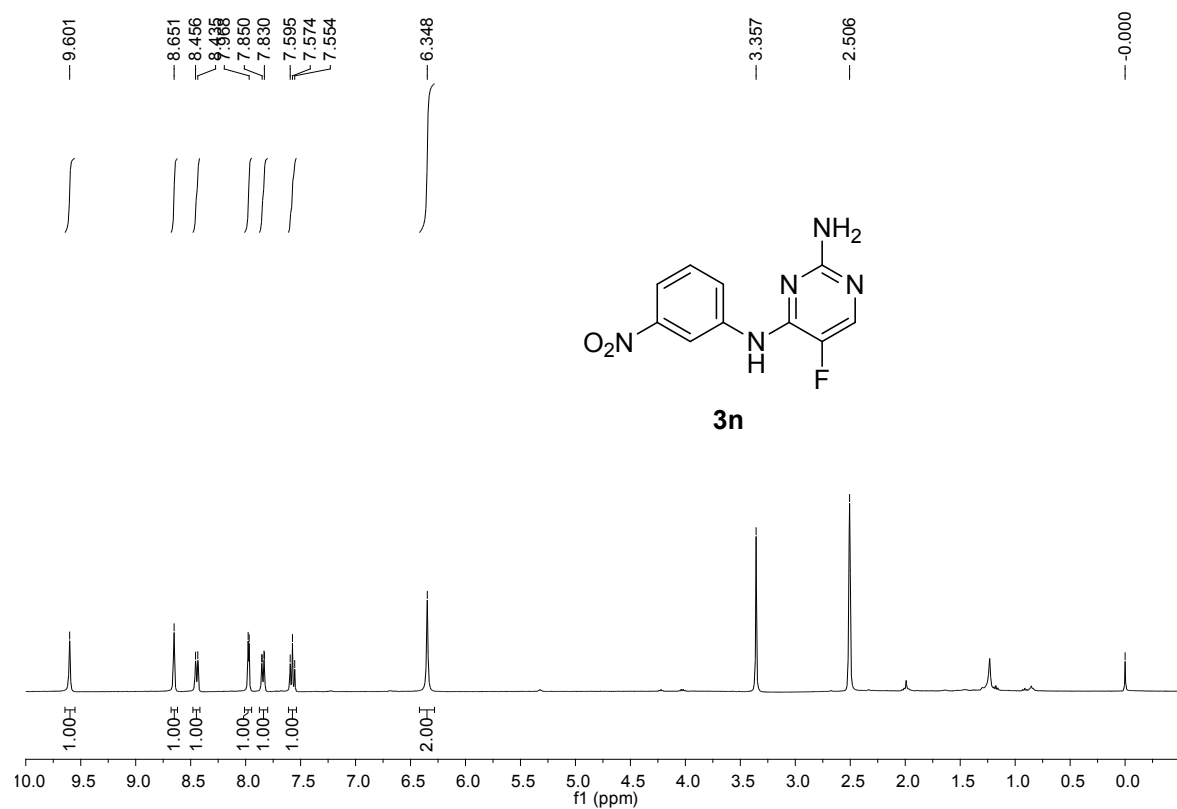

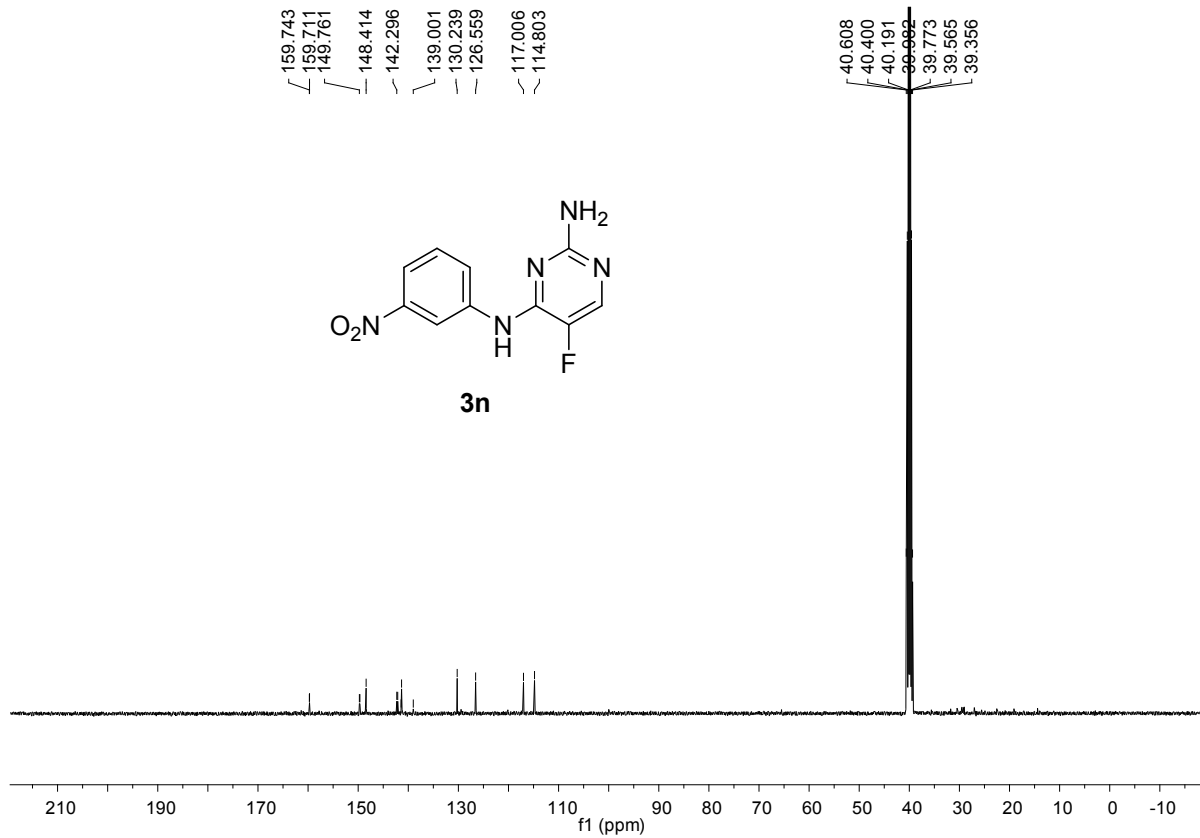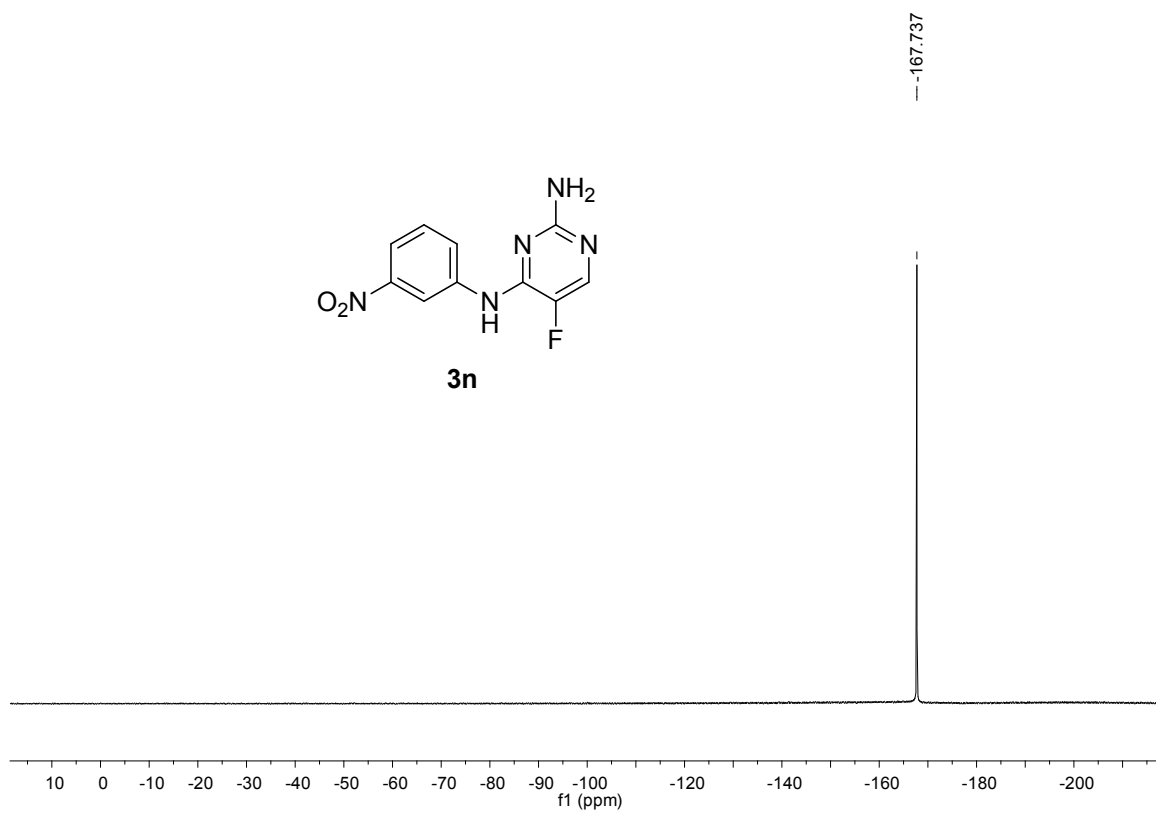

S30

NH<sub>2</sub>

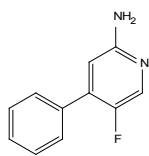

**3p**

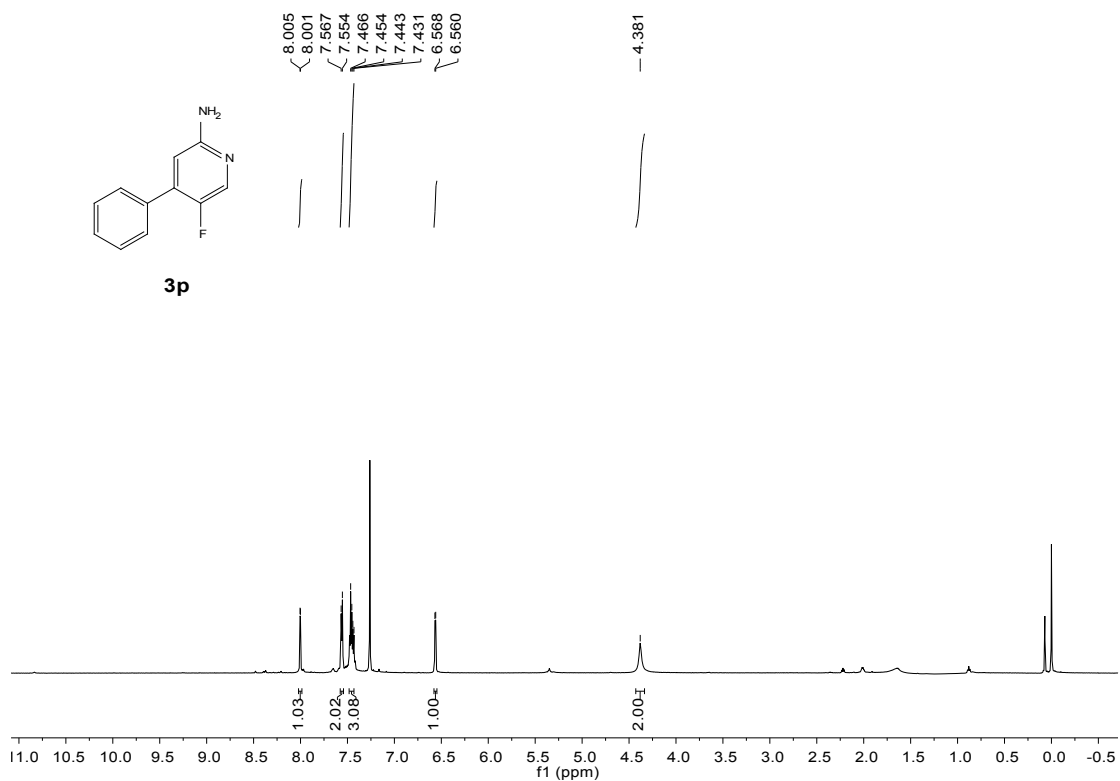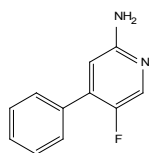

**3p**

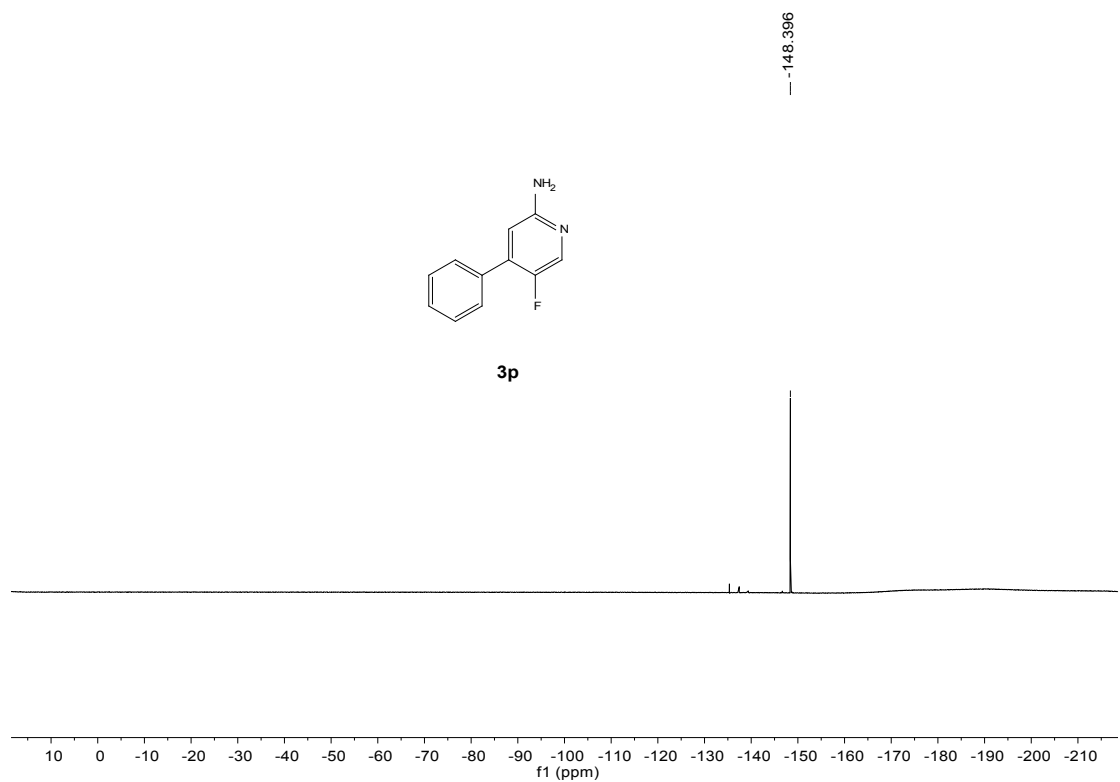

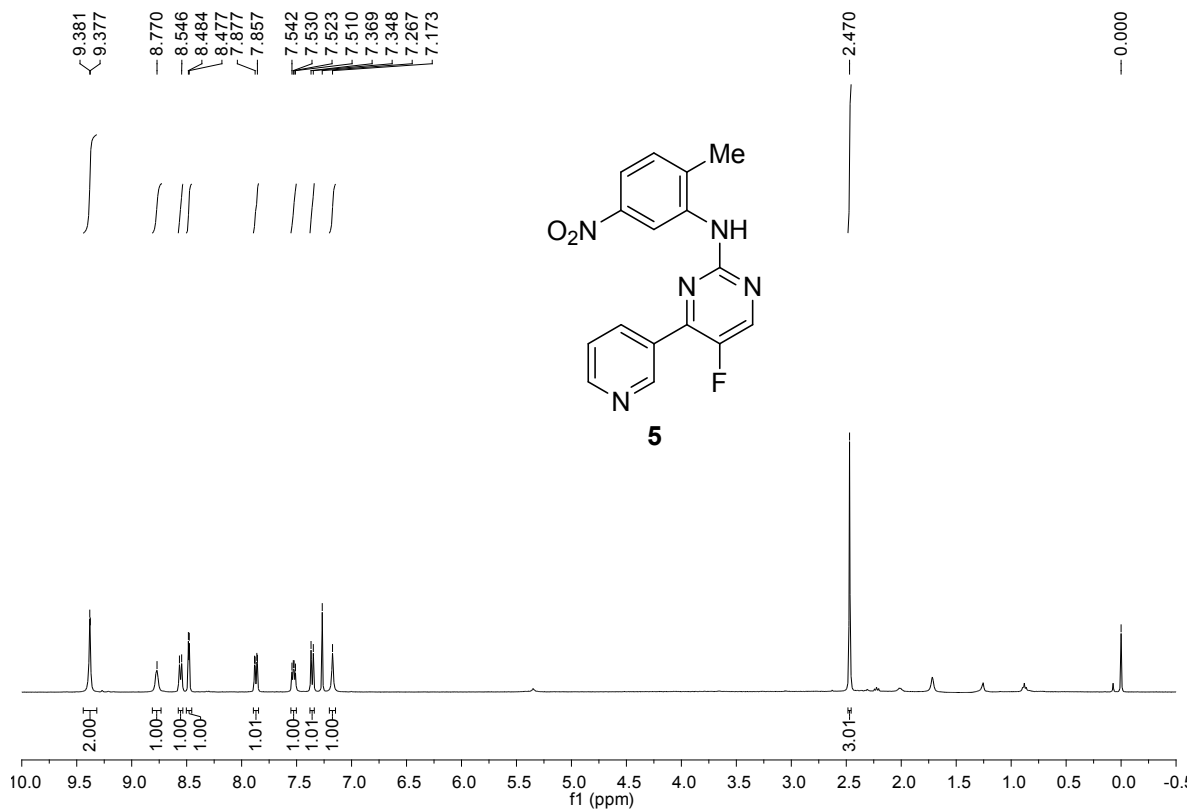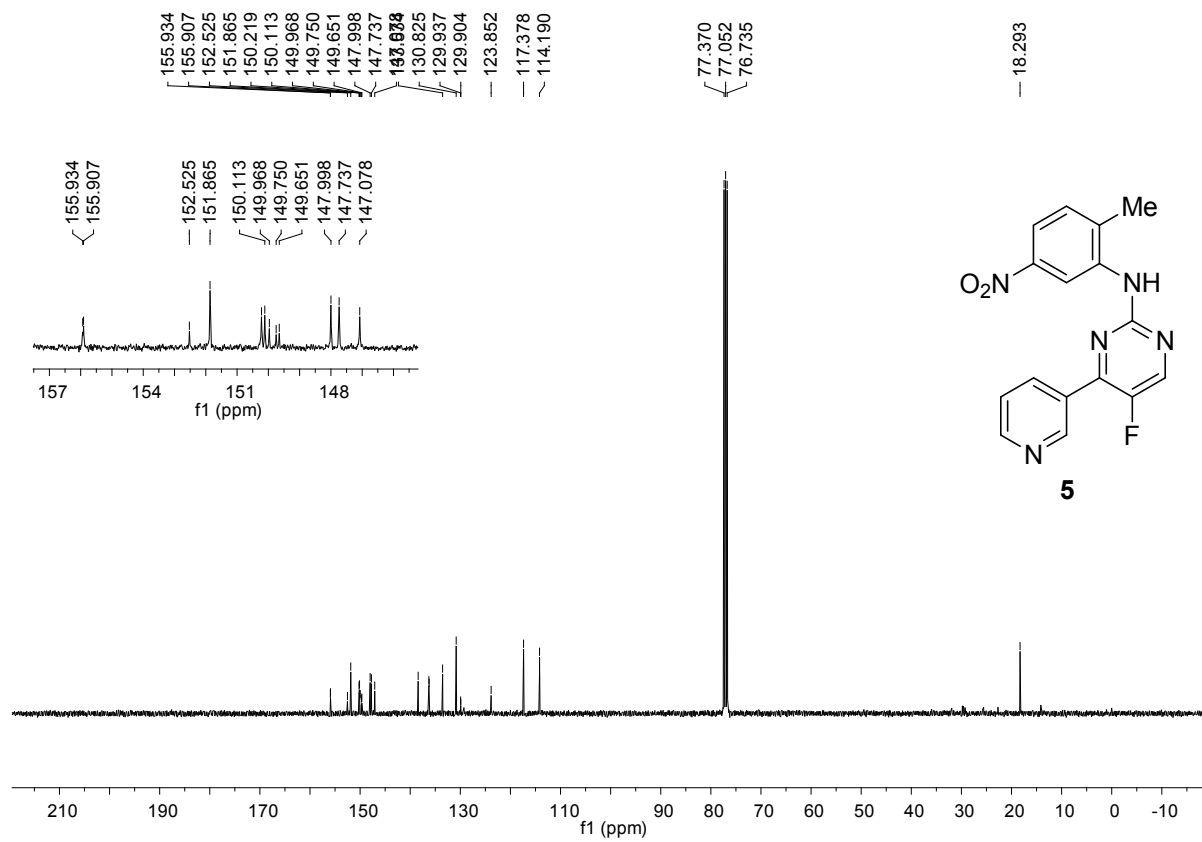



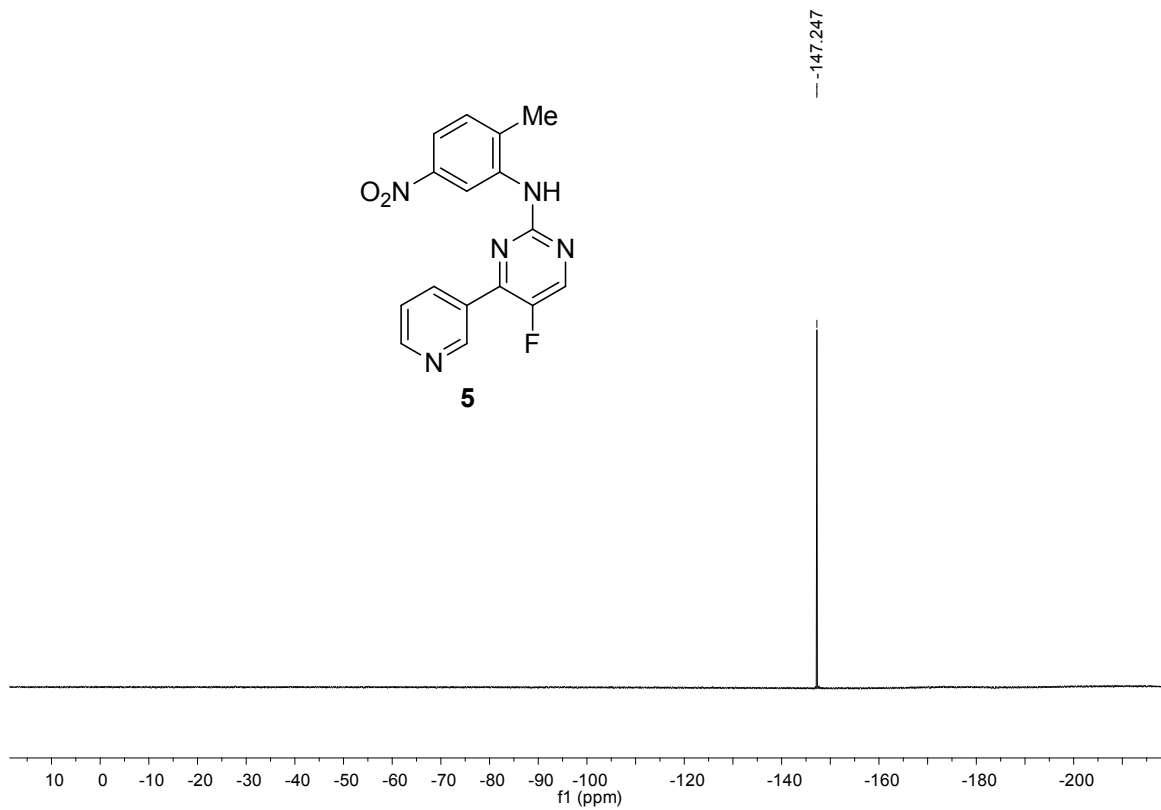

## 9. X-ray crystallography of 3a, 3l, 5 and Ag(dppm)1d complex

### X-ray crystallography of 3a

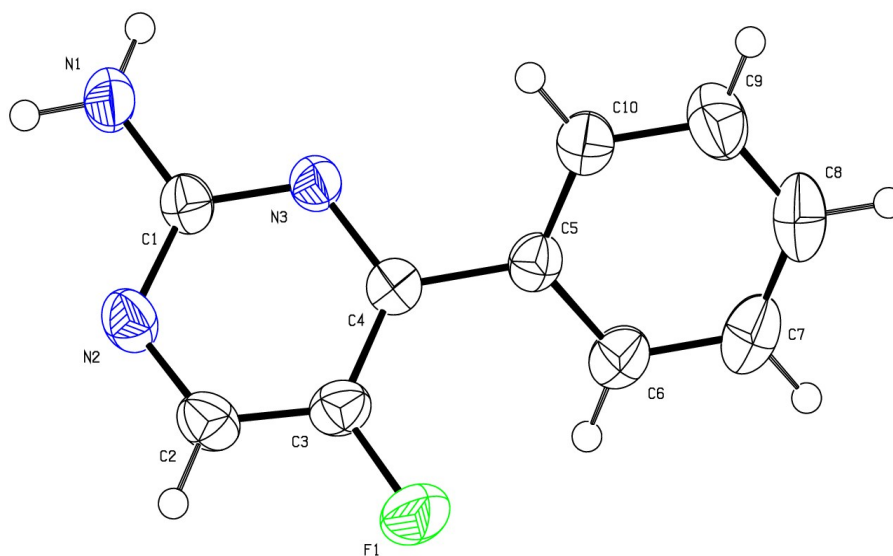

**3a**

Table 1. Crystal data and structure refinement for Mo\_160314ba.

|                                 |                                                 |          |
|---------------------------------|-------------------------------------------------|----------|
| Identification code             | Mo_160314ba                                     |          |
| Empirical formula               | C <sub>10</sub> H <sub>8</sub> F N <sub>3</sub> |          |
| Formula weight                  | 189.19                                          |          |
| Temperature                     | 293(2) K                                        |          |
| Wavelength                      | 0.71073 Å                                       |          |
| Crystal system                  | Orthorhombic                                    |          |
| Space group                     | Pbca                                            |          |
| Unit cell dimensions            | a = 7.4865(8) Å                                 | α = 90°. |
|                                 | b = 11.7277(13) Å                               | β = 90°. |
|                                 | c = 20.913(3) Å                                 | γ = 90°. |
| Volume                          | 1836.1(4) Å <sup>3</sup>                        |          |
| Z                               | 8                                               |          |
| Density (calculated)            | 1.369 Mg/m <sup>3</sup>                         |          |
| Absorption coefficient          | 0.100 mm <sup>-1</sup>                          |          |
| F(000)                          | 784                                             |          |
| Crystal size                    | 0.300 x 0.150 x 0.150 mm <sup>3</sup>           |          |
| Theta range for data collection | 3.347 to 27.582°.                               |          |
| Index ranges                    | -9 ≤ h ≤ 9, -15 ≤ k ≤ 15, -27 ≤ l ≤ 26          |          |
| Reflections collected           | 47406                                           |          |
| Independent reflections         | 2114 [R(int) = 0.0361]                          |          |
| Completeness to theta = 25.242° | 99.9 %                                          |          |
| Absorption correction           | Semi-empirical from equivalents                 |          |
| Refinement method               | Full-matrix least-squares on F <sup>2</sup>     |          |

|                                   |                                    |
|-----------------------------------|------------------------------------|
| Data / restraints / parameters    | 2114 / 2 / 135                     |
| Goodness-of-fit on F <sup>2</sup> | 1.106                              |
| Final R indices [I>2sigma(I)]     | R1 = 0.0436, wR2 = 0.0997          |
| R indices (all data)              | R1 = 0.0552, wR2 = 0.1080          |
| Extinction coefficient            | n/a                                |
| Largest diff. peak and hole       | 0.212 and -0.221 e.Å <sup>-3</sup> |

Table 2. Atomic coordinates ( $\times 10^4$ ) and equivalent isotropic displacement parameters ( $\text{\AA}^2 \times 10^3$ ) for Mo\_160314ba.  $U(\text{eq})$  is defined as one third of the trace of the orthogonalized  $U^{ij}$  tensor.

|       | x        | y       | z       | U(eq) |
|-------|----------|---------|---------|-------|
| F(1)  | 4707(1)  | 3876(1) | 6350(1) | 59(1) |
| N(1)  | 4664(2)  | 7772(1) | 5026(1) | 47(1) |
| C(1)  | 4693(2)  | 6790(1) | 5356(1) | 34(1) |
| N(2)  | 3200(2)  | 6143(1) | 5342(1) | 40(1) |
| C(2)  | 3258(2)  | 5181(1) | 5675(1) | 42(1) |
| N(3)  | 6204(1)  | 6529(1) | 5675(1) | 33(1) |
| C(3)  | 4749(2)  | 4859(1) | 6010(1) | 38(1) |
| C(4)  | 6249(2)  | 5549(1) | 6007(1) | 32(1) |
| C(5)  | 7911(2)  | 5280(1) | 6362(1) | 34(1) |
| C(6)  | 8552(2)  | 4168(1) | 6402(1) | 41(1) |
| C(7)  | 10070(2) | 3933(2) | 6753(1) | 52(1) |
| C(8)  | 10961(2) | 4793(2) | 7067(1) | 56(1) |
| C(9)  | 10359(2) | 5899(2) | 7021(1) | 56(1) |
| C(10) | 8847(2)  | 6145(1) | 6666(1) | 45(1) |

Table 3. Bond lengths [ $\text{\AA}$ ] and angles [ $^\circ$ ] for Mo\_160314ba.

---

|                  |            |
|------------------|------------|
| F(1)-C(3)        | 1.3557(16) |
| N(1)-C(1)        | 1.3428(18) |
| N(1)-H(1A)       | 0.891(14)  |
| N(1)-H(1B)       | 0.875(14)  |
| C(1)-N(3)        | 1.3483(16) |
| C(1)-N(2)        | 1.3515(17) |
| N(2)-C(2)        | 1.3257(18) |
| C(2)-C(3)        | 1.371(2)   |
| C(2)-H(2)        | 0.9300     |
| N(3)-C(4)        | 1.3434(16) |
| C(3)-C(4)        | 1.3834(19) |
| C(4)-C(5)        | 1.4833(18) |
| C(5)-C(10)       | 1.388(2)   |
| C(5)-C(6)        | 1.3918(19) |
| C(6)-C(7)        | 1.382(2)   |
| C(6)-H(6)        | 0.9300     |
| C(7)-C(8)        | 1.376(3)   |
| C(7)-H(7)        | 0.9300     |
| C(8)-C(9)        | 1.377(2)   |
| C(8)-H(8)        | 0.9300     |
| C(9)-C(10)       | 1.384(2)   |
| C(9)-H(9)        | 0.9300     |
| C(10)-H(10)      | 0.9300     |
|                  |            |
| C(1)-N(1)-H(1A)  | 117.7(12)  |
| C(1)-N(1)-H(1B)  | 120.6(12)  |
| H(1A)-N(1)-H(1B) | 118.1(16)  |
| N(1)-C(1)-N(3)   | 117.52(12) |
| N(1)-C(1)-N(2)   | 117.21(12) |
| N(3)-C(1)-N(2)   | 125.27(12) |
| C(2)-N(2)-C(1)   | 116.05(12) |
| N(2)-C(2)-C(3)   | 121.94(13) |
| N(2)-C(2)-H(2)   | 119.0      |
| C(3)-C(2)-H(2)   | 119.0      |
| C(4)-N(3)-C(1)   | 118.06(11) |
| F(1)-C(3)-C(2)   | 118.92(12) |

|                  |            |
|------------------|------------|
| F(1)-C(3)-C(4)   | 121.24(13) |
| C(2)-C(3)-C(4)   | 119.83(13) |
| N(3)-C(4)-C(3)   | 118.85(12) |
| N(3)-C(4)-C(5)   | 117.47(11) |
| C(3)-C(4)-C(5)   | 123.66(12) |
| C(10)-C(5)-C(6)  | 118.91(13) |
| C(10)-C(5)-C(4)  | 119.87(12) |
| C(6)-C(5)-C(4)   | 121.22(12) |
| C(7)-C(6)-C(5)   | 120.17(14) |
| C(7)-C(6)-H(6)   | 119.9      |
| C(5)-C(6)-H(6)   | 119.9      |
| C(8)-C(7)-C(6)   | 120.39(15) |
| C(8)-C(7)-H(7)   | 119.8      |
| C(6)-C(7)-H(7)   | 119.8      |
| C(7)-C(8)-C(9)   | 119.93(15) |
| C(7)-C(8)-H(8)   | 120.0      |
| C(9)-C(8)-H(8)   | 120.0      |
| C(8)-C(9)-C(10)  | 120.13(16) |
| C(8)-C(9)-H(9)   | 119.9      |
| C(10)-C(9)-H(9)  | 119.9      |
| C(9)-C(10)-C(5)  | 120.43(14) |
| C(9)-C(10)-H(10) | 119.8      |
| C(5)-C(10)-H(10) | 119.8      |

---

Symmetry transformations used to generate equivalent atoms:

Table 4. Anisotropic displacement parameters ( $\text{\AA}^2 \times 10^3$ ) for Mo\_160314ba. The anisotropic displacement factor exponent takes the form:  $-2\pi^2 [ h^2 a^{*2} U^{11} + \dots + 2 h k a^* b^* U^{12} ]$

|       | $U^{11}$ | $U^{22}$ | $U^{33}$ | $U^{23}$ | $U^{13}$ | $U^{12}$ |
|-------|----------|----------|----------|----------|----------|----------|
| F(1)  | 50(1)    | 47(1)    | 81(1)    | 25(1)    | 2(1)     | -8(1)    |
| N(1)  | 32(1)    | 53(1)    | 57(1)    | 20(1)    | -9(1)    | -4(1)    |
| C(1)  | 30(1)    | 40(1)    | 31(1)    | 1(1)     | 2(1)     | 1(1)     |
| N(2)  | 30(1)    | 51(1)    | 40(1)    | 4(1)     | 0(1)     | -4(1)    |
| C(2)  | 33(1)    | 47(1)    | 44(1)    | 2(1)     | 4(1)     | -8(1)    |
| N(3)  | 30(1)    | 35(1)    | 33(1)    | 2(1)     | -1(1)    | -1(1)    |
| C(3)  | 39(1)    | 36(1)    | 41(1)    | 6(1)     | 6(1)     | -3(1)    |
| C(4)  | 32(1)    | 34(1)    | 29(1)    | -1(1)    | 4(1)     | 1(1)     |
| C(5)  | 34(1)    | 37(1)    | 30(1)    | 5(1)     | 3(1)     | 2(1)     |
| C(6)  | 42(1)    | 39(1)    | 42(1)    | 4(1)     | 5(1)     | 5(1)     |
| C(7)  | 51(1)    | 55(1)    | 50(1)    | 12(1)    | 4(1)     | 18(1)    |
| C(8)  | 46(1)    | 79(1)    | 42(1)    | 7(1)     | -8(1)    | 15(1)    |
| C(9)  | 50(1)    | 66(1)    | 51(1)    | -4(1)    | -15(1)   | 0(1)     |
| C(10) | 46(1)    | 41(1)    | 47(1)    | 1(1)     | -8(1)    | 2(1)     |

Table 5. Hydrogen coordinates ( $\times 10^4$ ) and isotropic displacement parameters ( $\text{\AA}^2 \times 10^{-3}$ ) for Mo\_160314ba.

|       | x        | y        | z       | U(eq) |
|-------|----------|----------|---------|-------|
| H(1A) | 3720(20) | 7906(15) | 4776(8) | 55(5) |
| H(1B) | 5655(19) | 8142(15) | 4947(8) | 55(5) |
| H(2)  | 2257     | 4711     | 5681    | 50    |
| H(6)  | 7956     | 3582     | 6191    | 49    |
| H(7)  | 10492    | 3188     | 6778    | 62    |
| H(8)  | 11970    | 4628     | 7309    | 67    |
| H(9)  | 10969    | 6482     | 7229    | 67    |
| H(10) | 8456     | 6895     | 6632    | 53    |



Table 6. Torsion angles [°] for Mo\_160314ba.

|                      |             |
|----------------------|-------------|
| N(1)-C(1)-N(2)-C(2)  | -179.60(13) |
| N(3)-C(1)-N(2)-C(2)  | 0.4(2)      |
| C(1)-N(2)-C(2)-C(3)  | -0.5(2)     |
| N(1)-C(1)-N(3)-C(4)  | -179.99(12) |
| N(2)-C(1)-N(3)-C(4)  | 0.02(19)    |
| N(2)-C(2)-C(3)-F(1)  | 178.75(12)  |
| N(2)-C(2)-C(3)-C(4)  | 0.1(2)      |
| C(1)-N(3)-C(4)-C(3)  | -0.36(18)   |
| C(1)-N(3)-C(4)-C(5)  | -179.22(11) |
| F(1)-C(3)-C(4)-N(3)  | -178.29(12) |
| C(2)-C(3)-C(4)-N(3)  | 0.3(2)      |
| F(1)-C(3)-C(4)-C(5)  | 0.5(2)      |
| C(2)-C(3)-C(4)-C(5)  | 179.08(12)  |
| N(3)-C(4)-C(5)-C(10) | 38.07(17)   |
| C(3)-C(4)-C(5)-C(10) | -140.73(14) |
| N(3)-C(4)-C(5)-C(6)  | -142.52(13) |
| C(3)-C(4)-C(5)-C(6)  | 38.68(19)   |
| C(10)-C(5)-C(6)-C(7) | 1.6(2)      |
| C(4)-C(5)-C(6)-C(7)  | -177.79(12) |
| C(5)-C(6)-C(7)-C(8)  | 0.0(2)      |
| C(6)-C(7)-C(8)-C(9)  | -1.2(3)     |
| C(7)-C(8)-C(9)-C(10) | 0.7(3)      |
| C(8)-C(9)-C(10)-C(5) | 0.9(3)      |
| C(6)-C(5)-C(10)-C(9) | -2.1(2)     |
| C(4)-C(5)-C(10)-C(9) | 177.32(14)  |

Symmetry transformations used to generate equivalent atoms:

Table 7. Hydrogen bonds for Mo\_160314ba [ $\text{\AA}$  and  $^\circ$ ].

| D-H...A             | d(D-H)    | d(H...A)  | d(D...A)   | $\angle(\text{DHA})$ |
|---------------------|-----------|-----------|------------|----------------------|
| N(1)-H(1B)...N(2)#1 | 0.875(14) | 2.168(14) | 3.0361(17) | 171.7(17)            |
| N(1)-H(1A)...N(3)#2 | 0.891(14) | 2.210(14) | 3.0870(16) | 167.9(15)            |

Symmetry transformations used to generate equivalent atoms:

#1  $x+1/2, -y+3/2, -z+1$       #2  $x-1/2, -y+3/2, -z+1$

## X-ray crystallography of 3l

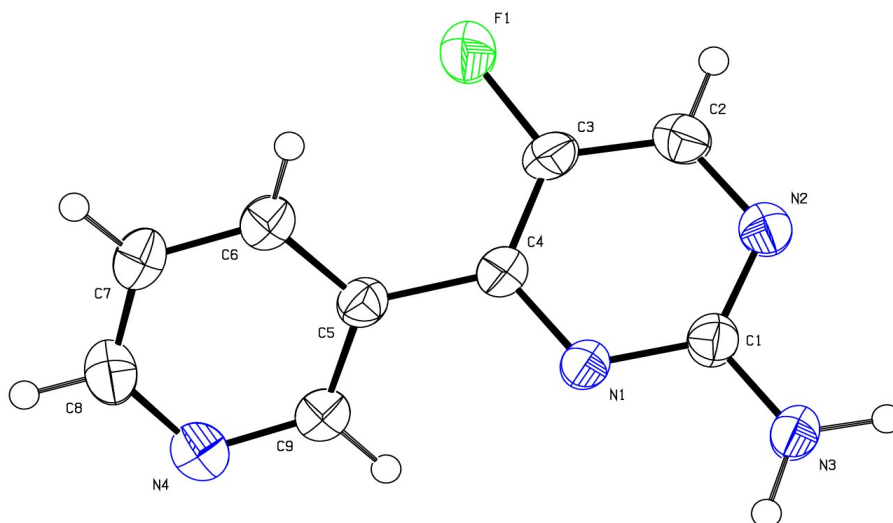

**3l**

Table 1. Crystal data and structure refinement for mo\_160518e.

|                                 |                                                |                  |
|---------------------------------|------------------------------------------------|------------------|
| Identification code             | mo_160518e                                     |                  |
| Empirical formula               | C <sub>9</sub> H <sub>7</sub> F N <sub>4</sub> |                  |
| Formula weight                  | 190.07                                         |                  |
| Temperature                     | 293(2) K                                       |                  |
| Wavelength                      | 0.71073 Å                                      |                  |
| Crystal system                  | Monoclinic                                     |                  |
| Space group                     | P2 <sub>1</sub> /n                             |                  |
| Unit cell dimensions            | a = 6.185(2) Å                                 | α = 90°.         |
|                                 | b = 7.487(2) Å                                 | β = 96.138(11)°. |
|                                 | c = 18.728(6) Å                                | γ = 90°.         |
| Volume                          | 862.2(5) Å <sup>3</sup>                        |                  |
| Z                               | 4                                              |                  |
| Density (calculated)            | 1.457 Mg/m <sup>3</sup>                        |                  |
| Absorption coefficient          | 0.107 mm <sup>-1</sup>                         |                  |
| F(000)                          | 392                                            |                  |
| Crystal size                    | 0.250 x 0.250 x 0.080 mm <sup>3</sup>          |                  |
| Theta range for data collection | 2.932 to 27.597°.                              |                  |
| Index ranges                    | -8 ≤ h ≤ 8, -9 ≤ k ≤ 9, -24 ≤ l ≤ 24           |                  |
| Reflections collected           | 20099                                          |                  |
| Independent reflections         | 1996 [R(int) = 0.0389]                         |                  |
| Completeness to theta = 25.242° | 99.9 %                                         |                  |
| Absorption correction           | Semi-empirical from equivalents                |                  |

|                                   |                                             |
|-----------------------------------|---------------------------------------------|
| Refinement method                 | Full-matrix least-squares on F <sup>2</sup> |
| Data / restraints / parameters    | 1996 / 1 / 136                              |
| Goodness-of-fit on F <sup>2</sup> | 1.050                                       |
| Final R indices [I>2sigma(I)]     | R1 = 0.0546, wR2 = 0.1129                   |
| R indices (all data)              | R1 = 0.0746, wR2 = 0.1211                   |
| Extinction coefficient            | 0.020(3)                                    |
| Largest diff. peak and hole       | 0.408 and -0.181 e.Å <sup>-3</sup>          |

Table 2. Atomic coordinates ( $\times 10^4$ ) and equivalent isotropic displacement parameters ( $\text{\AA}^2 \times 10^3$ ) for mo\_160518e.  $U(\text{eq})$  is defined as one third of the trace of the orthogonalized  $U^{ij}$  tensor.

|      | x       | y       | z       | U(eq) |
|------|---------|---------|---------|-------|
| F(1) | 9276(2) | 1852(2) | 6046(1) | 49(1) |
| N(1) | 4470(2) | 3538(2) | 6841(1) | 33(1) |
| C(1) | 4026(3) | 2040(3) | 7197(1) | 35(1) |
| N(2) | 5159(3) | 497(2)  | 7200(1) | 40(1) |
| C(2) | 6854(3) | 505(3)  | 6821(1) | 40(1) |
| N(3) | 2339(3) | 2083(3) | 7592(1) | 49(1) |
| C(3) | 7430(3) | 1982(3) | 6451(1) | 36(1) |
| C(4) | 6192(3) | 3520(3) | 6460(1) | 30(1) |
| C(5) | 6584(3) | 5160(3) | 6050(1) | 32(1) |
| C(6) | 8636(3) | 5726(3) | 5918(1) | 44(1) |
| C(7) | 8817(4) | 7247(3) | 5510(1) | 52(1) |
| C(8) | 6966(4) | 8146(3) | 5248(1) | 49(1) |
| N(4) | 4975(3) | 7649(3) | 5372(1) | 47(1) |
| C(9) | 4830(3) | 6176(3) | 5765(1) | 40(1) |

Table 3. Bond lengths [ $\text{\AA}$ ] and angles [ $^\circ$ ] for mo\_160518e.

---

|                  |            |
|------------------|------------|
| F(1)-C(3)        | 1.440(2)   |
| N(1)-C(4)        | 1.344(2)   |
| N(1)-C(1)        | 1.347(2)   |
| C(1)-N(2)        | 1.351(3)   |
| C(1)-N(3)        | 1.342(3)   |
| N(2)-C(2)        | 1.327(3)   |
| C(2)-C(3)        | 1.371(3)   |
| C(2)-H(2)        | 0.9300     |
| N(3)-H(3A)       | 0.97(3)    |
| N(3)-H(3B)       | 0.95(3)    |
| C(3)-C(4)        | 1.384(3)   |
| C(4)-C(5)        | 1.482(3)   |
| C(5)-C(6)        | 1.385(3)   |
| C(5)-C(9)        | 1.384(3)   |
| C(6)-C(7)        | 1.382(3)   |
| C(6)-H(6)        | 0.9300     |
| C(7)-C(8)        | 1.373(3)   |
| C(7)-H(7)        | 0.9300     |
| C(8)-N(4)        | 1.331(3)   |
| C(8)-H(8)        | 0.9300     |
| N(4)-C(9)        | 1.334(3)   |
| C(9)-H(9)        | 0.9300     |
|                  |            |
| C(4)-N(1)-C(1)   | 117.98(16) |
| N(2)-C(1)-N(1)   | 125.49(17) |
| N(2)-C(1)-N(3)   | 116.86(18) |
| N(1)-C(1)-N(3)   | 117.65(18) |
| C(2)-N(2)-C(1)   | 115.67(17) |
| N(2)-C(2)-C(3)   | 122.43(19) |
| N(2)-C(2)-H(2)   | 118.8      |
| C(3)-C(2)-H(2)   | 118.8      |
| C(1)-N(3)-H(3A)  | 118.4(14)  |
| C(1)-N(3)-H(3B)  | 122.5(15)  |
| H(3A)-N(3)-H(3B) | 119(2)     |
| C(2)-C(3)-C(4)   | 119.38(17) |
| C(2)-C(3)-F(1)   | 118.35(17) |

|                |            |
|----------------|------------|
| C(4)-C(3)-F(1) | 122.25(17) |
| N(1)-C(4)-C(3) | 119.05(17) |
| N(1)-C(4)-C(5) | 116.74(16) |
| C(3)-C(4)-C(5) | 124.17(16) |
| C(6)-C(5)-C(9) | 117.29(18) |
| C(6)-C(5)-C(4) | 123.38(18) |
| C(9)-C(5)-C(4) | 119.32(17) |
| C(5)-C(6)-C(7) | 118.7(2)   |
| C(5)-C(6)-H(6) | 120.6      |
| C(7)-C(6)-H(6) | 120.6      |
| C(8)-C(7)-C(6) | 119.2(2)   |
| C(8)-C(7)-H(7) | 120.4      |
| C(6)-C(7)-H(7) | 120.4      |
| N(4)-C(8)-C(7) | 123.5(2)   |
| N(4)-C(8)-H(8) | 118.2      |
| C(7)-C(8)-H(8) | 118.2      |
| C(8)-N(4)-C(9) | 116.45(19) |
| N(4)-C(9)-C(5) | 124.79(19) |
| N(4)-C(9)-H(9) | 117.6      |
| C(5)-C(9)-H(9) | 117.6      |

---

Symmetry transformations used to generate equivalent atoms:

Table 4. Anisotropic displacement parameters ( $\text{\AA}^2 \times 10^3$ ) for mo\_160518e. The anisotropic displacement factor exponent takes the form:  $-2\pi^2 [ h^2 a^{*2} U^{11} + \dots + 2 h k a^* b^* U^{12} ]$

|      | $U^{11}$ | $U^{22}$ | $U^{33}$ | $U^{23}$ | $U^{13}$ | $U^{12}$ |
|------|----------|----------|----------|----------|----------|----------|
| F(1) | 57(1)    | 43(1)    | 50(1)    | 9(1)     | 19(1)    | 3(1)     |
| N(1) | 33(1)    | 30(1)    | 38(1)    | 1(1)     | 12(1)    | -1(1)    |
| C(1) | 37(1)    | 31(1)    | 37(1)    | 0(1)     | 10(1)    | -2(1)    |
| N(2) | 46(1)    | 33(1)    | 44(1)    | 4(1)     | 15(1)    | 4(1)     |
| C(2) | 43(1)    | 36(1)    | 42(1)    | 4(1)     | 10(1)    | 9(1)     |
| N(3) | 53(1)    | 34(1)    | 66(1)    | 9(1)     | 35(1)    | 4(1)     |
| C(3) | 31(1)    | 42(1)    | 36(1)    | 1(1)     | 12(1)    | 4(1)     |
| C(4) | 29(1)    | 33(1)    | 30(1)    | -1(1)    | 4(1)     | -2(1)    |
| C(5) | 32(1)    | 32(1)    | 31(1)    | -1(1)    | 9(1)     | -1(1)    |
| C(6) | 33(1)    | 45(1)    | 56(1)    | 11(1)    | 10(1)    | -1(1)    |
| C(7) | 41(1)    | 49(1)    | 70(2)    | 15(1)    | 18(1)    | -6(1)    |
| C(8) | 57(1)    | 40(1)    | 51(1)    | 12(1)    | 14(1)    | -2(1)    |
| N(4) | 46(1)    | 43(1)    | 53(1)    | 11(1)    | 8(1)     | 5(1)     |
| C(9) | 34(1)    | 41(1)    | 45(1)    | 6(1)     | 9(1)     | 1(1)     |



Table 5. Hydrogen coordinates ( $\times 10^4$ ) and isotropic displacement parameters ( $\text{\AA}^2 \times 10^{-3}$ ) for mo\_160518e.

|       | x        | y        | z        | U(eq) |
|-------|----------|----------|----------|-------|
| H(2)  | 7682     | -528     | 6806     | 48    |
| H(3A) | 1900(40) | 980(40)  | 7807(13) | 58(7) |
| H(3B) | 1460(40) | 3110(30) | 7622(13) | 53(7) |
| H(6)  | 9868     | 5094     | 6099     | 53    |
| H(7)  | 10177    | 7656     | 5415     | 63    |
| H(8)  | 7112     | 9157     | 4969     | 58    |
| H(9)  | 3449     | 5804     | 5854     | 47    |

Table 6. Torsion angles [ $^{\circ}$ ] for mo\_160518e.

|                     |             |
|---------------------|-------------|
| C(4)-N(1)-C(1)-N(2) | -0.7(3)     |
| C(4)-N(1)-C(1)-N(3) | 178.25(19)  |
| N(1)-C(1)-N(2)-C(2) | 0.7(3)      |
| N(3)-C(1)-N(2)-C(2) | -178.2(2)   |
| C(1)-N(2)-C(2)-C(3) | 0.2(3)      |
| N(2)-C(2)-C(3)-C(4) | -1.0(3)     |
| N(2)-C(2)-C(3)-F(1) | -179.06(18) |
| C(1)-N(1)-C(4)-C(3) | -0.2(3)     |
| C(1)-N(1)-C(4)-C(5) | 177.52(17)  |
| C(2)-C(3)-C(4)-N(1) | 1.0(3)      |
| F(1)-C(3)-C(4)-N(1) | 179.01(17)  |
| C(2)-C(3)-C(4)-C(5) | -176.54(18) |
| F(1)-C(3)-C(4)-C(5) | 1.4(3)      |
| N(1)-C(4)-C(5)-C(6) | 148.7(2)    |
| C(3)-C(4)-C(5)-C(6) | -33.6(3)    |
| N(1)-C(4)-C(5)-C(9) | -32.8(3)    |
| C(3)-C(4)-C(5)-C(9) | 144.8(2)    |
| C(9)-C(5)-C(6)-C(7) | -0.4(3)     |
| C(4)-C(5)-C(6)-C(7) | 178.1(2)    |
| C(5)-C(6)-C(7)-C(8) | -0.2(4)     |
| C(6)-C(7)-C(8)-N(4) | 1.0(4)      |
| C(7)-C(8)-N(4)-C(9) | -1.1(4)     |
| C(8)-N(4)-C(9)-C(5) | 0.4(3)      |
| C(6)-C(5)-C(9)-N(4) | 0.3(3)      |
| C(4)-C(5)-C(9)-N(4) | -178.23(19) |

Symmetry transformations used to generate equivalent atoms:

Table 7. Hydrogen bonds for mo\_160518e [ $\text{\AA}$  and  $^\circ$ ].

| D-H...A             | d(D-H)  | d(H...A) | d(D...A) | $\angle(\text{DHA})$ |
|---------------------|---------|----------|----------|----------------------|
| N(3)-H(3B)...N(2)#1 | 0.95(3) | 2.09(3)  | 3.033(3) | 172(2)               |
| N(3)-H(3A)...N(1)#2 | 0.97(3) | 2.15(3)  | 3.111(3) | 171(2)               |
| C(6)-H(6)...F(1)    | 0.93    | 2.46     | 2.934(3) | 112.0                |

Symmetry transformations used to generate equivalent atoms:

#1  $-x+1/2, y+1/2, -z+3/2$     #2  $-x+1/2, y-1/2, -z+3/2$

## X-ray crystallography of the fluorinated intermediate 5

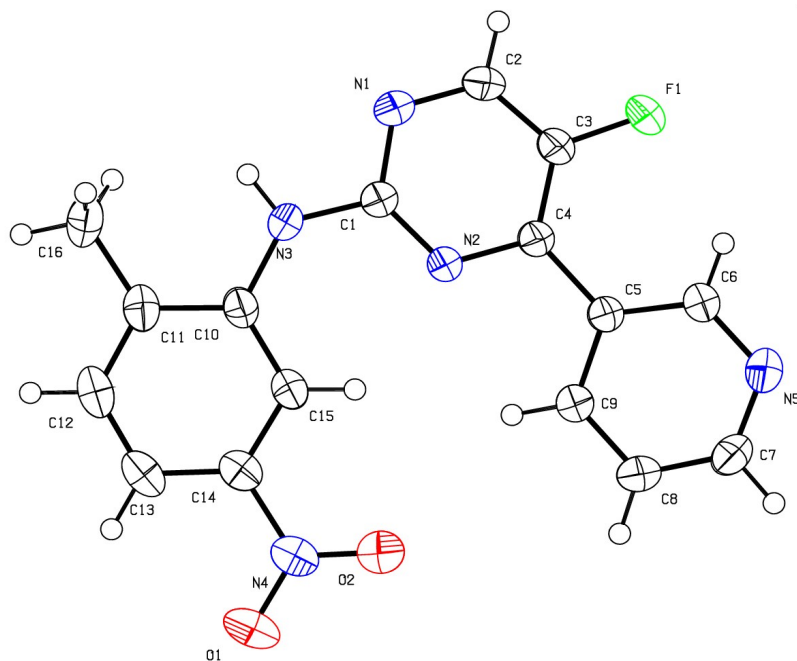

### 5

Table 1. Crystal data and structure refinement for mo\_160711a.

|                                 |                                                                 |                 |
|---------------------------------|-----------------------------------------------------------------|-----------------|
| Identification code             | mo_160711a                                                      |                 |
| Empirical formula               | C <sub>16</sub> H <sub>12</sub> F N <sub>5</sub> O <sub>2</sub> |                 |
| Formula weight                  | 325.31                                                          |                 |
| Temperature                     | 293(2) K                                                        |                 |
| Wavelength                      | 0.71073 Å                                                       |                 |
| Crystal system                  | Monoclinic                                                      |                 |
| Space group                     | P2 <sub>1</sub> /c                                              |                 |
| Unit cell dimensions            | a = 8.4745(7) Å                                                 | α = 90°.        |
|                                 | b = 13.4830(13) Å                                               | β = 96.566(3)°. |
|                                 | c = 12.5515(12) Å                                               | γ = 90°.        |
| Volume                          | 1424.7(2) Å <sup>3</sup>                                        |                 |
| Z                               | 4                                                               |                 |
| Density (calculated)            | 1.517 Mg/m <sup>3</sup>                                         |                 |
| Absorption coefficient          | 0.114 mm <sup>-1</sup>                                          |                 |
| F(000)                          | 672                                                             |                 |
| Crystal size                    | 0.220 x 0.160 x 0.120 mm <sup>3</sup>                           |                 |
| Theta range for data collection | 2.852 to 27.103°.                                               |                 |
| Index ranges                    | -10 ≤ h ≤ 10, -17 ≤ k ≤ 17, -16 ≤ l ≤ 16                        |                 |
| Reflections collected           | 26719                                                           |                 |
| Independent reflections         | 3144 [R(int) = 0.0291]                                          |                 |
| Completeness to theta = 25.242° | 99.9 %                                                          |                 |

|                                   |                                             |
|-----------------------------------|---------------------------------------------|
| Absorption correction             | Semi-empirical from equivalents             |
| Refinement method                 | Full-matrix least-squares on F <sup>2</sup> |
| Data / restraints / parameters    | 3144 / 1 / 222                              |
| Goodness-of-fit on F <sup>2</sup> | 1.046                                       |
| Final R indices [I>2sigma(I)]     | R1 = 0.0443, wR2 = 0.1115                   |
| R indices (all data)              | R1 = 0.0581, wR2 = 0.1196                   |
| Largest diff. peak and hole       | 0.190 and -0.230 e.Å <sup>-3</sup>          |

Table 2. Atomic coordinates ( $\times 10^4$ ) and equivalent isotropic displacement parameters ( $\text{\AA}^2 \times 10^3$ ) for mo\_160711a.  $U(\text{eq})$  is defined as one third of the trace of the orthogonalized  $U^{ij}$  tensor.

|       | x       | y       | z       | U(eq) |
|-------|---------|---------|---------|-------|
| F(1)  | -149(1) | 6855(1) | 7635(1) | 52(1) |
| O(1)  | 5411(2) | 4545(1) | 2092(1) | 66(1) |
| O(2)  | 4598(2) | 5593(1) | 3200(1) | 58(1) |
| N(1)  | 500(2)  | 4303(1) | 7046(1) | 44(1) |
| N(2)  | 1786(1) | 5313(1) | 5840(1) | 33(1) |
| N(3)  | 1830(2) | 3572(1) | 5782(1) | 42(1) |
| N(4)  | 4724(2) | 4744(1) | 2871(1) | 44(1) |
| N(5)  | 2307(2) | 8858(1) | 5965(1) | 56(1) |
| C(1)  | 1370(2) | 4444(1) | 6223(1) | 34(1) |
| C(2)  | 26(2)   | 5124(1) | 7493(1) | 42(1) |
| C(3)  | 408(2)  | 6054(1) | 7144(1) | 35(1) |
| C(4)  | 1311(2) | 6150(1) | 6300(1) | 31(1) |
| C(5)  | 1827(2) | 7093(1) | 5842(1) | 33(1) |
| C(6)  | 1794(2) | 8011(1) | 6355(1) | 45(1) |
| C(7)  | 2893(2) | 8811(1) | 5025(2) | 53(1) |
| C(8)  | 2963(2) | 7949(1) | 4446(1) | 51(1) |
| C(9)  | 2427(2) | 7080(1) | 4853(1) | 42(1) |
| C(10) | 2639(2) | 3399(1) | 4884(1) | 35(1) |
| C(11) | 2747(2) | 2405(1) | 4537(1) | 40(1) |
| C(12) | 3514(2) | 2218(1) | 3637(1) | 48(1) |
| C(13) | 4159(2) | 2961(1) | 3073(1) | 46(1) |
| C(14) | 4042(2) | 3926(1) | 3440(1) | 38(1) |
| C(15) | 3312(2) | 4154(1) | 4339(1) | 36(1) |
| C(16) | 2061(2) | 1558(1) | 5118(2) | 55(1) |

Table 3. Bond lengths [ $\text{\AA}$ ] and angles [ $^\circ$ ] for mo\_160711a.

---

|              |            |
|--------------|------------|
| F(1)-C(3)    | 1.3557(16) |
| O(1)-N(4)    | 1.2238(17) |
| O(2)-N(4)    | 1.2257(18) |
| N(1)-C(2)    | 1.324(2)   |
| N(1)-C(1)    | 1.3498(18) |
| N(2)-C(1)    | 1.3285(17) |
| N(2)-C(4)    | 1.3503(17) |
| N(3)-C(1)    | 1.3749(18) |
| N(3)-C(10)   | 1.4045(18) |
| N(3)-H(3A)   | 0.877(14)  |
| N(4)-C(14)   | 1.468(2)   |
| N(5)-C(7)    | 1.333(2)   |
| N(5)-C(6)    | 1.334(2)   |
| C(2)-C(3)    | 1.379(2)   |
| C(2)-H(2)    | 0.9300     |
| C(3)-C(4)    | 1.3818(19) |
| C(4)-C(5)    | 1.4817(18) |
| C(5)-C(9)    | 1.394(2)   |
| C(5)-C(6)    | 1.397(2)   |
| C(6)-H(6)    | 0.9300     |
| C(7)-C(8)    | 1.377(2)   |
| C(7)-H(7)    | 0.9300     |
| C(8)-C(9)    | 1.375(2)   |
| C(8)-H(8)    | 0.9300     |
| C(9)-H(9)    | 0.9300     |
| C(10)-C(15)  | 1.384(2)   |
| C(10)-C(11)  | 1.415(2)   |
| C(11)-C(12)  | 1.389(2)   |
| C(11)-C(16)  | 1.508(2)   |
| C(12)-C(13)  | 1.375(2)   |
| C(12)-H(12)  | 0.9300     |
| C(13)-C(14)  | 1.388(2)   |
| C(13)-H(13)  | 0.9300     |
| C(14)-C(15)  | 1.381(2)   |
| C(15)-H(15)  | 0.9300     |
| C(16)-H(16A) | 0.9600     |

|                  |            |
|------------------|------------|
| C(16)-H(16B)     | 0.9600     |
| C(16)-H(16C)     | 0.9600     |
| C(2)-N(1)-C(1)   | 115.12(12) |
| C(1)-N(2)-C(4)   | 118.54(12) |
| C(1)-N(3)-C(10)  | 130.71(12) |
| C(1)-N(3)-H(3A)  | 113.7(12)  |
| C(10)-N(3)-H(3A) | 115.5(12)  |
| O(1)-N(4)-O(2)   | 122.75(15) |
| O(1)-N(4)-C(14)  | 118.31(14) |
| O(2)-N(4)-C(14)  | 118.94(12) |
| C(7)-N(5)-C(6)   | 117.04(14) |
| N(2)-C(1)-N(1)   | 126.33(13) |
| N(2)-C(1)-N(3)   | 120.57(12) |
| N(1)-C(1)-N(3)   | 113.09(12) |
| N(1)-C(2)-C(3)   | 122.16(13) |
| N(1)-C(2)-H(2)   | 118.9      |
| C(3)-C(2)-H(2)   | 118.9      |
| F(1)-C(3)-C(2)   | 118.25(12) |
| F(1)-C(3)-C(4)   | 121.74(13) |
| C(2)-C(3)-C(4)   | 120.00(13) |
| N(2)-C(4)-C(3)   | 117.86(12) |
| N(2)-C(4)-C(5)   | 115.86(11) |
| C(3)-C(4)-C(5)   | 126.28(12) |
| C(9)-C(5)-C(6)   | 116.76(13) |
| C(9)-C(5)-C(4)   | 119.22(12) |
| C(6)-C(5)-C(4)   | 124.00(13) |
| N(5)-C(6)-C(5)   | 124.35(14) |
| N(5)-C(6)-H(6)   | 117.8      |
| C(5)-C(6)-H(6)   | 117.8      |
| N(5)-C(7)-C(8)   | 123.37(15) |
| N(5)-C(7)-H(7)   | 118.3      |
| C(8)-C(7)-H(7)   | 118.3      |
| C(9)-C(8)-C(7)   | 119.16(15) |
| C(9)-C(8)-H(8)   | 120.4      |
| C(7)-C(8)-H(8)   | 120.4      |
| C(8)-C(9)-C(5)   | 119.31(14) |
| C(8)-C(9)-H(9)   | 120.3      |



|                     |            |
|---------------------|------------|
| C(5)-C(9)-H(9)      | 120.3      |
| C(15)-C(10)-N(3)    | 122.77(13) |
| C(15)-C(10)-C(11)   | 119.94(13) |
| N(3)-C(10)-C(11)    | 117.29(13) |
| C(12)-C(11)-C(10)   | 118.32(15) |
| C(12)-C(11)-C(16)   | 119.85(14) |
| C(10)-C(11)-C(16)   | 121.83(14) |
| C(13)-C(12)-C(11)   | 122.48(14) |
| C(13)-C(12)-H(12)   | 118.8      |
| C(11)-C(12)-H(12)   | 118.8      |
| C(12)-C(13)-C(14)   | 117.66(14) |
| C(12)-C(13)-H(13)   | 121.2      |
| C(14)-C(13)-H(13)   | 121.2      |
| C(15)-C(14)-C(13)   | 122.33(15) |
| C(15)-C(14)-N(4)    | 117.92(13) |
| C(13)-C(14)-N(4)    | 119.74(13) |
| C(14)-C(15)-C(10)   | 119.24(13) |
| C(14)-C(15)-H(15)   | 120.4      |
| C(10)-C(15)-H(15)   | 120.4      |
| C(11)-C(16)-H(16A)  | 109.5      |
| C(11)-C(16)-H(16B)  | 109.5      |
| H(16A)-C(16)-H(16B) | 109.5      |
| C(11)-C(16)-H(16C)  | 109.5      |
| H(16A)-C(16)-H(16C) | 109.5      |
| H(16B)-C(16)-H(16C) | 109.5      |

---

Symmetry transformations used to generate equivalent atoms:

Table 4. Anisotropic displacement parameters ( $\text{\AA}^2 \times 10^3$ ) for mo\_160711a. The anisotropic displacement factor exponent takes the form:  $-2\pi^2 [ h^2 a^{*2} U^{11} + \dots + 2 h k a^* b^* U^{12} ]$

|       | U <sup>11</sup> | U <sup>22</sup> | U <sup>33</sup> | U <sup>23</sup> | U <sup>13</sup> | U <sup>12</sup> |
|-------|-----------------|-----------------|-----------------|-----------------|-----------------|-----------------|
| F(1)  | 67(1)           | 38(1)           | 57(1)           | -4(1)           | 36(1)           | 9(1)            |
| O(1)  | 77(1)           | 74(1)           | 54(1)           | -4(1)           | 38(1)           | 4(1)            |
| O(2)  | 77(1)           | 47(1)           | 55(1)           | -1(1)           | 27(1)           | -6(1)           |
| N(1)  | 57(1)           | 32(1)           | 46(1)           | 5(1)            | 24(1)           | -1(1)           |
| N(2)  | 42(1)           | 26(1)           | 34(1)           | 0(1)            | 14(1)           | 1(1)            |
| N(3)  | 59(1)           | 24(1)           | 45(1)           | 1(1)            | 22(1)           | -1(1)           |
| N(4)  | 44(1)           | 52(1)           | 38(1)           | -2(1)           | 13(1)           | 2(1)            |
| N(5)  | 74(1)           | 29(1)           | 69(1)           | -2(1)           | 33(1)           | 1(1)            |
| C(1)  | 41(1)           | 29(1)           | 34(1)           | 1(1)            | 11(1)           | 1(1)            |
| C(2)  | 50(1)           | 39(1)           | 42(1)           | 4(1)            | 23(1)           | 2(1)            |
| C(3)  | 39(1)           | 32(1)           | 37(1)           | -1(1)           | 14(1)           | 6(1)            |
| C(4)  | 32(1)           | 29(1)           | 31(1)           | 1(1)            | 7(1)            | 2(1)            |
| C(5)  | 35(1)           | 28(1)           | 36(1)           | 2(1)            | 11(1)           | 3(1)            |
| C(6)  | 60(1)           | 30(1)           | 49(1)           | -2(1)           | 25(1)           | 2(1)            |
| C(7)  | 64(1)           | 30(1)           | 70(1)           | 9(1)            | 31(1)           | 1(1)            |
| C(8)  | 68(1)           | 39(1)           | 52(1)           | 7(1)            | 31(1)           | 0(1)            |
| C(9)  | 57(1)           | 30(1)           | 40(1)           | -1(1)           | 20(1)           | 0(1)            |
| C(10) | 39(1)           | 29(1)           | 36(1)           | -4(1)           | 7(1)            | 5(1)            |
| C(11) | 45(1)           | 31(1)           | 43(1)           | -5(1)           | 2(1)            | 6(1)            |
| C(12) | 54(1)           | 37(1)           | 51(1)           | -14(1)          | 7(1)            | 8(1)            |
| C(13) | 47(1)           | 50(1)           | 41(1)           | -13(1)          | 11(1)           | 7(1)            |
| C(14) | 36(1)           | 43(1)           | 36(1)           | -3(1)           | 7(1)            | 3(1)            |
| C(15) | 40(1)           | 32(1)           | 38(1)           | -6(1)           | 11(1)           | 2(1)            |
| C(16) | 76(1)           | 27(1)           | 62(1)           | -3(1)           | 12(1)           | 3(1)            |

Table 5. Hydrogen coordinates ( $\times 10^4$ ) and isotropic displacement parameters ( $\text{\AA}^2 \times 10^{-3}$ ) for mo\_160711a.

|        | x        | y        | z        | U(eq) |
|--------|----------|----------|----------|-------|
| H(2)   | -584     | 5072     | 8061     | 51    |
| H(6)   | 1387     | 8034     | 7012     | 54    |
| H(7)   | 3275     | 9391     | 4746     | 64    |
| H(8)   | 3367     | 7953     | 3788     | 61    |
| H(9)   | 2465     | 6490     | 4473     | 50    |
| H(12)  | 3593     | 1566     | 3407     | 57    |
| H(13)  | 4656     | 2821     | 2467     | 55    |
| H(15)  | 3274     | 4806     | 4575     | 44    |
| H(16A) | 2050     | 969      | 4687     | 82    |
| H(16B) | 996      | 1718     | 5249     | 82    |
| H(16C) | 2701     | 1446     | 5790     | 82    |
| H(3A)  | 1510(20) | 3040(11) | 6097(13) | 50(5) |

Table 6. Torsion angles [ $^{\circ}$ ] for mo\_160711a.

---

|                         |             |
|-------------------------|-------------|
| C(4)-N(2)-C(1)-N(1)     | 0.0(2)      |
| C(4)-N(2)-C(1)-N(3)     | -179.84(13) |
| C(2)-N(1)-C(1)-N(2)     | 0.4(2)      |
| C(2)-N(1)-C(1)-N(3)     | -179.78(14) |
| C(10)-N(3)-C(1)-N(2)    | -5.0(3)     |
| C(10)-N(3)-C(1)-N(1)    | 175.13(15)  |
| C(1)-N(1)-C(2)-C(3)     | -0.4(2)     |
| N(1)-C(2)-C(3)-F(1)     | 178.93(14)  |
| N(1)-C(2)-C(3)-C(4)     | 0.1(2)      |
| C(1)-N(2)-C(4)-C(3)     | -0.3(2)     |
| C(1)-N(2)-C(4)-C(5)     | 179.42(13)  |
| F(1)-C(3)-C(4)-N(2)     | -178.49(13) |
| C(2)-C(3)-C(4)-N(2)     | 0.3(2)      |
| F(1)-C(3)-C(4)-C(5)     | 1.8(2)      |
| C(2)-C(3)-C(4)-C(5)     | -179.43(14) |
| N(2)-C(4)-C(5)-C(9)     | 14.3(2)     |
| C(3)-C(4)-C(5)-C(9)     | -166.01(15) |
| N(2)-C(4)-C(5)-C(6)     | -163.87(14) |
| C(3)-C(4)-C(5)-C(6)     | 15.8(2)     |
| C(7)-N(5)-C(6)-C(5)     | -0.3(3)     |
| C(9)-C(5)-C(6)-N(5)     | -0.6(3)     |
| C(4)-C(5)-C(6)-N(5)     | 177.59(16)  |
| C(6)-N(5)-C(7)-C(8)     | 1.1(3)      |
| N(5)-C(7)-C(8)-C(9)     | -1.0(3)     |
| C(7)-C(8)-C(9)-C(5)     | 0.0(3)      |
| C(6)-C(5)-C(9)-C(8)     | 0.7(2)      |
| C(4)-C(5)-C(9)-C(8)     | -177.55(15) |
| C(1)-N(3)-C(10)-C(15)   | 8.5(3)      |
| C(1)-N(3)-C(10)-C(11)   | -171.24(15) |
| C(15)-C(10)-C(11)-C(12) | -1.1(2)     |
| N(3)-C(10)-C(11)-C(12)  | 178.70(14)  |
| C(15)-C(10)-C(11)-C(16) | 178.76(15)  |
| N(3)-C(10)-C(11)-C(16)  | -1.5(2)     |
| C(10)-C(11)-C(12)-C(13) | -0.3(2)     |
| C(16)-C(11)-C(12)-C(13) | 179.84(16)  |
| C(11)-C(12)-C(13)-C(14) | 0.8(3)      |

|                         |             |
|-------------------------|-------------|
| C(12)-C(13)-C(14)-C(15) | 0.1(2)      |
| C(12)-C(13)-C(14)-N(4)  | 179.47(14)  |
| O(1)-N(4)-C(14)-C(15)   | 177.99(15)  |
| O(2)-N(4)-C(14)-C(15)   | -1.3(2)     |
| O(1)-N(4)-C(14)-C(13)   | -1.4(2)     |
| O(2)-N(4)-C(14)-C(13)   | 179.35(15)  |
| C(13)-C(14)-C(15)-C(10) | -1.5(2)     |
| N(4)-C(14)-C(15)-C(10)  | 179.15(13)  |
| N(3)-C(10)-C(15)-C(14)  | -177.82(14) |
| C(11)-C(10)-C(15)-C(14) | 2.0(2)      |

---

Symmetry transformations used to generate equivalent atoms:

Table 7. Hydrogen bonds for mo\_160711a [ $\text{\AA}$  and  $^\circ$ ].

| D-H...A             | d(D-H)    | d(H...A)  | d(D...A)   | $\angle(\text{DHA})$ |
|---------------------|-----------|-----------|------------|----------------------|
| C(2)-H(2)...N(5)#1  | 0.93      | 2.59      | 3.383(2)   | 143.3                |
| C(6)-H(6)...F(1)    | 0.93      | 2.25      | 2.8856(18) | 124.9                |
| C(15)-H(15)...N(2)  | 0.93      | 2.24      | 2.8677(18) | 123.8                |
| N(3)-H(3A)...F(1)#1 | 0.877(14) | 2.614(15) | 3.4618(15) | 162.7(16)            |

Symmetry transformations used to generate equivalent atoms:

#1  $-x, y-1/2, -z+3/2$

## X-ray crystallography of the Ag(dppm)1d complex

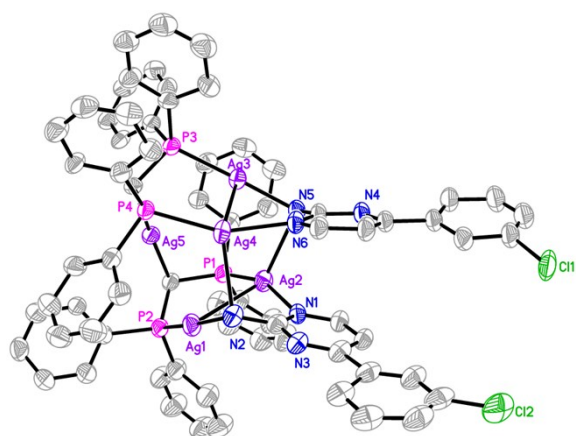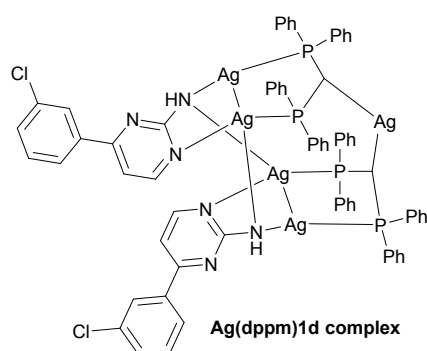

Table 1. Crystal data and structure refinement for 161012a\_a\_sq\_d.

|                                 |                                                                                               |          |
|---------------------------------|-----------------------------------------------------------------------------------------------|----------|
| Identification code             | 161012a_a_sq_d                                                                                |          |
| Empirical formula               | C <sub>70</sub> H <sub>56</sub> Ag <sub>5</sub> Cl <sub>2</sub> N <sub>6</sub> P <sub>4</sub> |          |
| Formula weight                  | 1715.33                                                                                       |          |
| Temperature                     | 296(2) K                                                                                      |          |
| Wavelength                      | 0.71073 Å                                                                                     |          |
| Crystal system                  | Orthorhombic                                                                                  |          |
| Space group                     | Aba2                                                                                          |          |
| Unit cell dimensions            | a = 27.38(3) Å                                                                                | α = 90°. |
|                                 | b = 26.90(3) Å                                                                                | β = 90°. |
|                                 | c = 24.03(3) Å                                                                                | γ = 90°. |
| Volume                          | 17696(31) Å <sup>3</sup>                                                                      |          |
| Z                               | 8                                                                                             |          |
| Density (calculated)            | 1.288 Mg/m <sup>3</sup>                                                                       |          |
| Absorption coefficient          | 1.255 mm <sup>-1</sup>                                                                        |          |
| F(000)                          | 6776                                                                                          |          |
| Crystal size                    | 0.350 x 0.320 x 0.300 mm <sup>3</sup>                                                         |          |
| Theta range for data collection | 2.845 to 25.287°.                                                                             |          |

|                                   |                                             |
|-----------------------------------|---------------------------------------------|
| Index ranges                      | -32<=h<=32, -32<=k<=31, -28<=l<=28          |
| Reflections collected             | 91342                                       |
| Independent reflections           | 15976 [R(int) = 0.0759]                     |
| Completeness to theta = 25.242°   | 99.8 %                                      |
| Absorption correction             | Semi-empirical from equivalents             |
| Refinement method                 | Full-matrix least-squares on F <sup>2</sup> |
| Data / restraints / parameters    | 15976 / 2531 / 803                          |
| Goodness-of-fit on F <sup>2</sup> | 1.112                                       |
| Final R indices [I>2sigma(I)]     | R1 = 0.0647, wR2 = 0.1672                   |
| R indices (all data)              | R1 = 0.0794, wR2 = 0.1826                   |
| Absolute structure parameter      | -0.030(16)                                  |
| Largest diff. peak and hole       | 0.837 and -0.767 e.Å <sup>-3</sup>          |



Table 2. Atomic coordinates ( $\times 10^4$ ) and equivalent isotropic displacement parameters ( $\text{\AA}^2 \times 10^3$ ) for 161012a\_a\_sq\_d.  $U(\text{eq})$  is defined as one third of the trace of the orthogonalized  $U^{ij}$  tensor.

|       | x       | y       | z        | U(eq)  |
|-------|---------|---------|----------|--------|
| Ag(1) | 3437(1) | 7578(1) | 6164(1)  | 76(1)  |
| Ag(2) | 2977(1) | 7648(1) | 5054(1)  | 69(1)  |
| Ag(3) | 2468(1) | 6491(1) | 4952(1)  | 70(1)  |
| Ag(4) | 2338(1) | 6942(1) | 6074(1)  | 71(1)  |
| Ag(5) | 3600(1) | 6400(1) | 5550(1)  | 62(1)  |
| P(1)  | 3684(1) | 7264(1) | 4668(2)  | 59(1)  |
| P(2)  | 4189(1) | 7361(1) | 5757(2)  | 66(1)  |
| P(3)  | 2707(1) | 5727(1) | 5339(2)  | 60(1)  |
| P(4)  | 2777(1) | 6236(1) | 6441(2)  | 58(1)  |
| N(1)  | 2538(4) | 8199(4) | 5520(5)  | 58(2)  |
| N(2)  | 2710(5) | 7783(5) | 6370(6)  | 71(3)  |
| N(3)  | 2183(5) | 8449(4) | 6391(6)  | 69(3)  |
| N(4)  | 1495(4) | 7697(5) | 4704(6)  | 68(3)  |
| N(5)  | 2181(4) | 7209(4) | 4743(6)  | 68(3)  |
| N(6)  | 1762(4) | 7347(4) | 5579(6)  | 65(2)  |
| C(1)  | 1655(7) | 9124(7) | 7053(9)  | 91(4)  |
| C(2)  | 3089(5) | 5864(5) | 5937(6)  | 58(3)  |
| C(3)  | 4072(5) | 6965(5) | 5165(6)  | 63(3)  |
| C(4)  | 4639(5) | 7024(6) | 6188(8)  | 76(3)  |
| C(5)  | 4857(6) | 7287(7) | 6635(9)  | 89(4)  |
| C(6)  | 5196(7) | 7054(7) | 6962(9)  | 97(4)  |
| C(7)  | 5328(7) | 6568(8) | 6867(9)  | 97(4)  |
| C(8)  | 5123(6) | 6317(7) | 6437(9)  | 93(4)  |
| C(9)  | 4764(5) | 6542(5) | 6138(8)  | 73(3)  |
| C(10) | 4555(6) | 7884(6) | 5528(9)  | 88(3)  |
| C(11) | 4368(7) | 8372(7) | 5554(11) | 103(4) |
| C(12) | 4655(9) | 8775(8) | 5359(12) | 123(5) |
| C(13) | 5096(8) | 8683(8) | 5134(12) | 119(5) |
| C(14) | 5010(7) | 7851(7) | 5314(9)  | 98(4)  |
| C(15) | 4515(7) | 7502(8) | 4008(10) | 107(4) |
| C(16) | 4060(6) | 7646(7) | 4218(9)  | 85(3)  |
| C(17) | 4785(8) | 7790(9) | 3676(11) | 121(5) |
| C(18) | 3472(6) | 6790(6) | 4164(8)  | 78(3)  |

|       |         |         |          |        |
|-------|---------|---------|----------|--------|
| C(19) | 3686(6) | 6297(6) | 4128(8)  | 80(3)  |
| C(20) | 3509(7) | 5966(7) | 3732(8)  | 92(4)  |
| C(21) | 3111(8) | 6090(8) | 3395(9)  | 99(5)  |
| C(22) | 3094(6) | 6911(7) | 3818(8)  | 85(4)  |
| C(23) | 2920(8) | 6558(8) | 3428(9)  | 100(5) |
| C(24) | 3044(5) | 5292(5) | 4909(7)  | 66(3)  |
| C(25) | 3534(6) | 5191(5) | 4962(7)  | 71(3)  |
| C(26) | 3765(7) | 4837(6) | 4611(8)  | 84(4)  |
| C(27) | 3514(8) | 4602(7) | 4217(10) | 97(4)  |
| C(28) | 3025(7) | 4701(7) | 4161(8)  | 89(4)  |
| C(29) | 2802(7) | 5037(6) | 4513(7)  | 80(3)  |
| C(30) | 2203(5) | 5337(5) | 5565(7)  | 67(3)  |
| C(31) | 2251(6) | 4894(6) | 5854(8)  | 79(3)  |
| C(32) | 1878(6) | 4605(7) | 6037(8)  | 89(4)  |
| C(33) | 1419(7) | 4734(8) | 5919(10) | 103(5) |
| C(34) | 1329(7) | 5164(8) | 5633(10) | 103(4) |
| C(35) | 1722(5) | 5500(7) | 5415(8)  | 87(4)  |
| C(36) | 2427(6) | 5790(6) | 6870(7)  | 74(3)  |
| C(37) | 2661(5) | 5418(5) | 7157(7)  | 69(3)  |
| C(38) | 1928(6) | 5818(6) | 6850(7)  | 75(3)  |
| C(39) | 1658(7) | 5429(7) | 7164(8)  | 89(4)  |
| C(40) | 1889(7) | 5103(7) | 7429(8)  | 91(4)  |
| C(41) | 3229(5) | 6456(5) | 6925(7)  | 68(3)  |
| C(42) | 3117(7) | 6852(7) | 7319(8)  | 90(4)  |
| C(43) | 3450(8) | 7014(9) | 7696(10) | 107(5) |
| C(44) | 3893(8) | 6829(8) | 7720(10) | 103(5) |
| C(45) | 4020(7) | 6451(7) | 7393(9)  | 95(4)  |
| C(46) | 3702(6) | 6256(7) | 6976(8)  | 79(3)  |
| C(47) | 1078(5) | 7880(6) | 5544(8)  | 76(3)  |
| C(48) | 1398(5) | 7563(6) | 5831(8)  | 71(3)  |
| C(49) | 1588(6) | 9138(6) | 6467(8)  | 76(3)  |
| C(50) | 1292(6) | 9465(6) | 6253(9)  | 87(4)  |
| C(51) | 1002(6) | 9768(6) | 6541(9)  | 96(4)  |
| C(52) | 1008(8) | 9758(7) | 7098(10) | 103(5) |
| C(53) | 1353(8) | 9454(8) | 7352(10) | 105(5) |
| C(54) | 1145(5) | 7933(5) | 4981(7)  | 70(3)  |
| C(55) | 809(5)  | 8247(6) | 4643(8)  | 81(3)  |
| C(56) | 523(5)  | 8601(6) | 4869(9)  | 86(4)  |

|        |          |          |          |        |
|--------|----------|----------|----------|--------|
| C(57)  | 190(6)   | 8874(6)  | 4550(9)  | 95(4)  |
| C(58)  | 192(7)   | 8808(8)  | 3974(11) | 111(5) |
| C(59)  | 466(7)   | 8475(8)  | 3744(11) | 105(5) |
| C(60)  | 789(7)   | 8165(7)  | 4072(9)  | 92(4)  |
| C(63)  | 1964(5)  | 8866(5)  | 5571(7)  | 66(3)  |
| C(64)  | 1804(5)  | 7408(5)  | 5001(7)  | 67(3)  |
| C(65)  | 2285(5)  | 8556(5)  | 5268(7)  | 67(3)  |
| C(66)  | 4633(9)  | 8222(9)  | 3504(11) | 116(5) |
| C(67)  | 4206(9)  | 8387(10) | 3654(11) | 125(5) |
| C(68)  | 3939(8)  | 8103(8)  | 4058(10) | 107(4) |
| C(69)  | 2380(7)  | 5068(7)  | 7435(8)  | 89(4)  |
| C(71)  | 5288(8)  | 8232(9)  | 5106(12) | 123(5) |
| C(72)  | 2462(5)  | 8153(5)  | 6096(7)  | 66(3)  |
| C(73)  | 1945(5)  | 8800(5)  | 6146(7)  | 68(3)  |
| Cl(1)  | -146(6)  | 9344(5)  | 4932(13) | 115(5) |
| Cl(2)  | 596(6)   | 10191(6) | 6357(15) | 131(5) |
| Cl(1') | -174(10) | 9358(10) | 4665(18) | 106(7) |
| Cl(2') | 605(8)   | 10154(9) | 6104(15) | 91(7)  |

---

Table 3. Bond lengths [ $\text{\AA}$ ] and angles [ $^\circ$ ] for 161012a\_a\_sq\_d.

---

|             |           |
|-------------|-----------|
| Ag(1)-N(2)  | 2.124(12) |
| Ag(1)-P(2)  | 2.354(4)  |
| Ag(1)-Ag(2) | 2.957(3)  |
| Ag(2)-N(1)  | 2.213(12) |
| Ag(2)-P(1)  | 2.382(4)  |
| Ag(2)-N(5)  | 2.588(12) |
| Ag(3)-N(5)  | 2.146(12) |
| Ag(3)-P(3)  | 2.347(4)  |
| Ag(3)-Ag(4) | 2.977(3)  |
| Ag(4)-N(6)  | 2.255(11) |
| Ag(4)-P(4)  | 2.414(4)  |
| Ag(4)-N(2)  | 2.583(13) |
| Ag(5)-C(3)  | 2.199(13) |
| Ag(5)-C(2)  | 2.216(13) |
| P(1)-C(3)   | 1.789(14) |
| P(1)-C(16)  | 1.812(17) |
| P(1)-C(18)  | 1.851(19) |
| P(2)-C(3)   | 1.805(16) |
| P(2)-C(10)  | 1.815(17) |
| P(2)-C(4)   | 1.847(15) |
| P(3)-C(24)  | 1.814(15) |
| P(3)-C(2)   | 1.816(14) |
| P(3)-C(30)  | 1.817(14) |
| P(4)-C(2)   | 1.788(14) |
| P(4)-C(41)  | 1.798(17) |
| P(4)-C(36)  | 1.848(17) |
| N(1)-C(65)  | 1.330(18) |
| N(1)-C(72)  | 1.40(2)   |
| N(2)-C(72)  | 1.373(19) |
| N(2)-H(2A)  | 0.8599    |
| N(3)-C(73)  | 1.288(19) |
| N(3)-C(72)  | 1.311(19) |
| N(4)-C(54)  | 1.33(2)   |
| N(4)-C(64)  | 1.352(17) |
| N(5)-C(64)  | 1.317(19) |
| N(5)-H(5A)  | 0.8600    |

|             |         |
|-------------|---------|
| N(6)-C(48)  | 1.30(2) |
| N(6)-C(64)  | 1.40(2) |
| C(1)-C(53)  | 1.41(3) |
| C(1)-C(49)  | 1.42(3) |
| C(1)-H(1)   | 0.9300  |
| C(2)-H(2)   | 0.9800  |
| C(3)-H(3)   | 0.9800  |
| C(4)-C(9)   | 1.35(2) |
| C(4)-C(5)   | 1.42(3) |
| C(5)-C(6)   | 1.37(3) |
| C(5)-H(5)   | 0.9300  |
| C(6)-C(7)   | 1.37(3) |
| C(6)-H(6)   | 0.9300  |
| C(7)-C(8)   | 1.35(3) |
| C(7)-H(7)   | 0.9300  |
| C(8)-C(9)   | 1.36(2) |
| C(8)-H(8)   | 0.9300  |
| C(9)-H(9)   | 0.9300  |
| C(10)-C(14) | 1.35(2) |
| C(10)-C(11) | 1.41(3) |
| C(11)-C(12) | 1.42(3) |
| C(11)-H(11) | 0.9300  |
| C(12)-C(13) | 1.35(3) |
| C(12)-H(12) | 0.9300  |
| C(13)-C(71) | 1.32(3) |
| C(13)-H(13) | 0.9300  |
| C(14)-C(71) | 1.37(3) |
| C(14)-H(14) | 0.9300  |
| C(15)-C(17) | 1.34(3) |
| C(15)-C(16) | 1.40(3) |
| C(15)-H(15) | 0.9300  |
| C(16)-C(68) | 1.33(3) |
| C(17)-C(66) | 1.30(3) |
| C(17)-H(17) | 0.9300  |
| C(18)-C(22) | 1.37(2) |
| C(18)-C(19) | 1.45(2) |
| C(19)-C(20) | 1.39(3) |
| C(19)-H(19) | 0.9300  |

|             |         |
|-------------|---------|
| C(20)-C(21) | 1.40(3) |
| C(20)-H(20) | 0.9300  |
| C(21)-C(23) | 1.37(3) |
| C(21)-H(21) | 0.9300  |
| C(22)-C(23) | 1.41(3) |
| C(22)-H(22) | 0.9300  |
| C(23)-H(23) | 0.9300  |
| C(24)-C(29) | 1.35(2) |
| C(24)-C(25) | 1.38(2) |
| C(25)-C(26) | 1.42(2) |
| C(25)-H(25) | 0.9300  |
| C(26)-C(27) | 1.33(3) |
| C(26)-H(26) | 0.9300  |
| C(27)-C(28) | 1.37(3) |
| C(27)-H(27) | 0.9300  |
| C(28)-C(29) | 1.38(2) |
| C(28)-H(28) | 0.9300  |
| C(29)-H(29) | 0.9300  |
| C(30)-C(31) | 1.38(2) |
| C(30)-C(35) | 1.43(2) |
| C(31)-C(32) | 1.36(2) |
| C(31)-H(31) | 0.9300  |
| C(32)-C(33) | 1.34(3) |
| C(32)-H(32) | 0.9300  |
| C(33)-C(34) | 1.37(3) |
| C(33)-H(33) | 0.9300  |
| C(34)-C(35) | 1.50(3) |
| C(34)-H(34) | 0.9300  |
| C(35)-H(35) | 0.9300  |
| C(36)-C(38) | 1.37(2) |
| C(36)-C(37) | 1.37(2) |
| C(37)-C(69) | 1.39(2) |
| C(37)-H(37) | 0.9300  |
| C(38)-C(39) | 1.49(2) |
| C(38)-H(38) | 0.9300  |
| C(39)-C(40) | 1.25(3) |
| C(39)-H(39) | 0.9300  |
| C(40)-C(69) | 1.35(3) |

|              |         |
|--------------|---------|
| C(40)-H(40)  | 0.9300  |
| C(41)-C(46)  | 1.41(2) |
| C(41)-C(42)  | 1.46(2) |
| C(42)-C(43)  | 1.36(3) |
| C(42)-H(42)  | 0.9300  |
| C(43)-C(44)  | 1.31(3) |
| C(43)-H(43)  | 0.9300  |
| C(44)-C(45)  | 1.33(3) |
| C(44)-H(44)  | 0.9300  |
| C(45)-C(46)  | 1.43(2) |
| C(45)-H(45)  | 0.9300  |
| C(46)-H(46)  | 0.9300  |
| C(47)-C(54)  | 1.37(2) |
| C(47)-C(48)  | 1.40(2) |
| C(47)-H(47)  | 0.9300  |
| C(48)-H(48)  | 0.9300  |
| C(49)-C(50)  | 1.30(2) |
| C(49)-C(73)  | 1.54(2) |
| C(50)-C(51)  | 1.33(2) |
| C(50)-H(50)  | 0.9300  |
| C(51)-C(52)  | 1.34(3) |
| C(51)-Cl(2)  | 1.65(2) |
| C(51)-Cl(2') | 1.83(2) |
| C(52)-C(53)  | 1.39(3) |
| C(52)-H(52)  | 0.9300  |
| C(53)-H(53)  | 0.9300  |
| C(54)-C(55)  | 1.49(2) |
| C(55)-C(56)  | 1.35(2) |
| C(55)-C(60)  | 1.39(3) |
| C(56)-C(57)  | 1.40(2) |
| C(56)-H(56)  | 0.9300  |
| C(57)-C(58)  | 1.40(3) |
| C(57)-Cl(1') | 1.66(2) |
| C(57)-Cl(1)  | 1.81(2) |
| C(58)-C(59)  | 1.29(3) |
| C(58)-H(58)  | 0.9300  |
| C(59)-C(60)  | 1.45(2) |
| C(59)-H(59)  | 0.9300  |

|             |         |
|-------------|---------|
| C(60)-H(60) | 0.9300  |
| C(63)-C(73) | 1.39(2) |
| C(63)-C(65) | 1.41(2) |
| C(63)-H(63) | 0.9300  |
| C(65)-H(65) | 0.9300  |
| C(66)-C(67) | 1.30(3) |
| C(66)-H(66) | 0.9300  |
| C(67)-C(68) | 1.44(3) |
| C(67)-H(67) | 0.9300  |
| C(68)-H(68) | 0.9300  |
| C(69)-H(69) | 0.9300  |
| C(71)-H(71) | 0.9300  |

|                  |           |
|------------------|-----------|
| N(2)-Ag(1)-P(2)  | 168.9(4)  |
| N(2)-Ag(1)-Ag(2) | 78.1(4)   |
| P(2)-Ag(1)-Ag(2) | 90.77(13) |
| N(1)-Ag(2)-P(1)  | 158.2(3)  |
| N(1)-Ag(2)-N(5)  | 89.7(4)   |
| P(1)-Ag(2)-N(5)  | 111.9(3)  |
| N(1)-Ag(2)-Ag(1) | 79.4(3)   |
| P(1)-Ag(2)-Ag(1) | 88.71(12) |
| N(5)-Ag(2)-Ag(1) | 126.2(3)  |
| N(5)-Ag(3)-P(3)  | 169.3(4)  |
| N(5)-Ag(3)-Ag(4) | 78.5(4)   |
| P(3)-Ag(3)-Ag(4) | 91.81(12) |
| N(6)-Ag(4)-P(4)  | 157.1(3)  |
| N(6)-Ag(4)-N(2)  | 89.8(4)   |
| P(4)-Ag(4)-N(2)  | 113.1(3)  |
| N(6)-Ag(4)-Ag(3) | 78.7(3)   |
| P(4)-Ag(4)-Ag(3) | 87.18(12) |
| N(2)-Ag(4)-Ag(3) | 124.0(3)  |
| C(3)-Ag(5)-C(2)  | 176.6(5)  |
| C(3)-P(1)-C(16)  | 108.3(8)  |
| C(3)-P(1)-C(18)  | 108.2(7)  |
| C(16)-P(1)-C(18) | 100.3(9)  |
| C(3)-P(1)-Ag(2)  | 114.7(5)  |
| C(16)-P(1)-Ag(2) | 116.7(6)  |
| C(18)-P(1)-Ag(2) | 107.4(5)  |



|                  |           |
|------------------|-----------|
| C(3)-P(2)-C(10)  | 108.5(9)  |
| C(3)-P(2)-C(4)   | 105.8(7)  |
| C(10)-P(2)-C(4)  | 100.5(8)  |
| C(3)-P(2)-Ag(1)  | 108.6(5)  |
| C(10)-P(2)-Ag(1) | 114.6(6)  |
| C(4)-P(2)-Ag(1)  | 118.2(6)  |
| C(24)-P(3)-C(2)  | 106.8(6)  |
| C(24)-P(3)-C(30) | 100.6(7)  |
| C(2)-P(3)-C(30)  | 108.5(7)  |
| C(24)-P(3)-Ag(3) | 118.8(5)  |
| C(2)-P(3)-Ag(3)  | 107.3(4)  |
| C(30)-P(3)-Ag(3) | 114.4(5)  |
| C(2)-P(4)-C(41)  | 107.0(7)  |
| C(2)-P(4)-C(36)  | 105.2(7)  |
| C(41)-P(4)-C(36) | 102.1(7)  |
| C(2)-P(4)-Ag(4)  | 115.5(5)  |
| C(41)-P(4)-Ag(4) | 108.7(5)  |
| C(36)-P(4)-Ag(4) | 117.1(5)  |
| C(65)-N(1)-C(72) | 115.8(12) |
| C(65)-N(1)-Ag(2) | 122.3(10) |
| C(72)-N(1)-Ag(2) | 121.4(9)  |
| C(72)-N(2)-Ag(1) | 122.7(10) |
| C(72)-N(2)-Ag(4) | 107.9(9)  |
| Ag(1)-N(2)-Ag(4) | 94.5(5)   |
| C(72)-N(2)-H(2A) | 119.3     |
| Ag(1)-N(2)-H(2A) | 107.8     |
| Ag(4)-N(2)-H(2A) | 98.7      |
| C(73)-N(3)-C(72) | 119.4(14) |
| C(54)-N(4)-C(64) | 117.5(14) |
| C(64)-N(5)-Ag(3) | 122.9(10) |
| C(64)-N(5)-Ag(2) | 109.8(10) |
| Ag(3)-N(5)-Ag(2) | 92.0(4)   |
| C(64)-N(5)-H(5A) | 120.6     |
| Ag(3)-N(5)-H(5A) | 109.2     |
| Ag(2)-N(5)-H(5A) | 93.8      |
| C(48)-N(6)-C(64) | 118.0(12) |
| C(48)-N(6)-Ag(4) | 120.4(11) |
| C(64)-N(6)-Ag(4) | 121.4(9)  |

|                   |           |
|-------------------|-----------|
| C(53)-C(1)-C(49)  | 114(2)    |
| C(53)-C(1)-H(1)   | 122.8     |
| C(49)-C(1)-H(1)   | 122.8     |
| P(4)-C(2)-P(3)    | 112.0(7)  |
| P(4)-C(2)-Ag(5)   | 102.8(6)  |
| P(3)-C(2)-Ag(5)   | 99.4(6)   |
| P(4)-C(2)-H(2)    | 113.8     |
| P(3)-C(2)-H(2)    | 113.8     |
| Ag(5)-C(2)-H(2)   | 113.8     |
| P(1)-C(3)-P(2)    | 111.5(7)  |
| P(1)-C(3)-Ag(5)   | 104.0(6)  |
| P(2)-C(3)-Ag(5)   | 100.3(7)  |
| P(1)-C(3)-H(3)    | 113.3     |
| P(2)-C(3)-H(3)    | 113.3     |
| Ag(5)-C(3)-H(3)   | 113.3     |
| C(9)-C(4)-C(5)    | 116.2(15) |
| C(9)-C(4)-P(2)    | 126.2(13) |
| C(5)-C(4)-P(2)    | 117.5(12) |
| C(6)-C(5)-C(4)    | 119.4(18) |
| C(6)-C(5)-H(5)    | 120.3     |
| C(4)-C(5)-H(5)    | 120.3     |
| C(5)-C(6)-C(7)    | 121.3(19) |
| C(5)-C(6)-H(6)    | 119.4     |
| C(7)-C(6)-H(6)    | 119.4     |
| C(8)-C(7)-C(6)    | 119.4(18) |
| C(8)-C(7)-H(7)    | 120.3     |
| C(6)-C(7)-H(7)    | 120.3     |
| C(7)-C(8)-C(9)    | 118.7(18) |
| C(7)-C(8)-H(8)    | 120.6     |
| C(9)-C(8)-H(8)    | 120.6     |
| C(4)-C(9)-C(8)    | 124.4(17) |
| C(4)-C(9)-H(9)    | 117.8     |
| C(8)-C(9)-H(9)    | 117.8     |
| C(14)-C(10)-C(11) | 114.5(17) |
| C(14)-C(10)-P(2)  | 125.0(14) |
| C(11)-C(10)-P(2)  | 120.5(14) |
| C(10)-C(11)-C(12) | 120(2)    |
| C(10)-C(11)-H(11) | 120.2     |

|                   |           |
|-------------------|-----------|
| C(12)-C(11)-H(11) | 120.2     |
| C(13)-C(12)-C(11) | 119(2)    |
| C(13)-C(12)-H(12) | 120.4     |
| C(11)-C(12)-H(12) | 120.4     |
| C(71)-C(13)-C(12) | 123(2)    |
| C(71)-C(13)-H(13) | 118.5     |
| C(12)-C(13)-H(13) | 118.5     |
| C(10)-C(14)-C(71) | 127(2)    |
| C(10)-C(14)-H(14) | 116.6     |
| C(71)-C(14)-H(14) | 116.6     |
| C(17)-C(15)-C(16) | 123(2)    |
| C(17)-C(15)-H(15) | 118.3     |
| C(16)-C(15)-H(15) | 118.3     |
| C(68)-C(16)-C(15) | 111.9(17) |
| C(68)-C(16)-P(1)  | 123.6(15) |
| C(15)-C(16)-P(1)  | 124.5(14) |
| C(66)-C(17)-C(15) | 122(2)    |
| C(66)-C(17)-H(17) | 119.0     |
| C(15)-C(17)-H(17) | 119.0     |
| C(22)-C(18)-C(19) | 119.0(17) |
| C(22)-C(18)-P(1)  | 118.1(13) |
| C(19)-C(18)-P(1)  | 122.9(13) |
| C(20)-C(19)-C(18) | 119.0(17) |
| C(20)-C(19)-H(19) | 120.5     |
| C(18)-C(19)-H(19) | 120.5     |
| C(19)-C(20)-C(21) | 121.1(18) |
| C(19)-C(20)-H(20) | 119.4     |
| C(21)-C(20)-H(20) | 119.4     |
| C(23)-C(21)-C(20) | 118.9(19) |
| C(23)-C(21)-H(21) | 120.6     |
| C(20)-C(21)-H(21) | 120.6     |
| C(18)-C(22)-C(23) | 120.0(19) |
| C(18)-C(22)-H(22) | 120.0     |
| C(23)-C(22)-H(22) | 120.0     |
| C(21)-C(23)-C(22) | 122(2)    |
| C(21)-C(23)-H(23) | 119.1     |
| C(22)-C(23)-H(23) | 119.1     |
| C(29)-C(24)-C(25) | 116.4(15) |

|                   |           |
|-------------------|-----------|
| C(29)-C(24)-P(3)  | 118.8(11) |
| C(25)-C(24)-P(3)  | 124.8(12) |
| C(24)-C(25)-C(26) | 120.7(16) |
| C(24)-C(25)-H(25) | 119.6     |
| C(26)-C(25)-H(25) | 119.6     |
| C(27)-C(26)-C(25) | 120.7(17) |
| C(27)-C(26)-H(26) | 119.6     |
| C(25)-C(26)-H(26) | 119.6     |
| C(26)-C(27)-C(28) | 118.9(19) |
| C(26)-C(27)-H(27) | 120.5     |
| C(28)-C(27)-H(27) | 120.5     |
| C(27)-C(28)-C(29) | 119.8(18) |
| C(27)-C(28)-H(28) | 120.1     |
| C(29)-C(28)-H(28) | 120.1     |
| C(24)-C(29)-C(28) | 123.4(17) |
| C(24)-C(29)-H(29) | 118.3     |
| C(28)-C(29)-H(29) | 118.3     |
| C(31)-C(30)-C(35) | 118.5(14) |
| C(31)-C(30)-P(3)  | 125.0(11) |
| C(35)-C(30)-P(3)  | 116.5(12) |
| C(32)-C(31)-C(30) | 125.8(17) |
| C(32)-C(31)-H(31) | 117.1     |
| C(30)-C(31)-H(31) | 117.1     |
| C(33)-C(32)-C(31) | 119.3(19) |
| C(33)-C(32)-H(32) | 120.4     |
| C(31)-C(32)-H(32) | 120.4     |
| C(32)-C(33)-C(34) | 119.8(18) |
| C(32)-C(33)-H(33) | 120.1     |
| C(34)-C(33)-H(33) | 120.1     |
| C(33)-C(34)-C(35) | 123.9(18) |
| C(33)-C(34)-H(34) | 118.1     |
| C(35)-C(34)-H(34) | 118.1     |
| C(30)-C(35)-C(34) | 112.7(16) |
| C(30)-C(35)-H(35) | 123.7     |
| C(34)-C(35)-H(35) | 123.7     |
| C(38)-C(36)-C(37) | 121.5(15) |
| C(38)-C(36)-P(4)  | 117.5(13) |
| C(37)-C(36)-P(4)  | 120.7(12) |

|                   |           |
|-------------------|-----------|
| C(36)-C(37)-C(69) | 118.5(15) |
| C(36)-C(37)-H(37) | 120.8     |
| C(69)-C(37)-H(37) | 120.8     |
| C(36)-C(38)-C(39) | 116.1(16) |
| C(36)-C(38)-H(38) | 121.9     |
| C(39)-C(38)-H(38) | 121.9     |
| C(40)-C(39)-C(38) | 119.8(18) |
| C(40)-C(39)-H(39) | 120.1     |
| C(38)-C(39)-H(39) | 120.1     |
| C(39)-C(40)-C(69) | 123.9(18) |
| C(39)-C(40)-H(40) | 118.1     |
| C(69)-C(40)-H(40) | 118.1     |
| C(46)-C(41)-C(42) | 114.6(15) |
| C(46)-C(41)-P(4)  | 124.3(13) |
| C(42)-C(41)-P(4)  | 121.0(12) |
| C(43)-C(42)-C(41) | 121.7(18) |
| C(43)-C(42)-H(42) | 119.1     |
| C(41)-C(42)-H(42) | 119.1     |
| C(44)-C(43)-C(42) | 122(2)    |
| C(44)-C(43)-H(43) | 119.0     |
| C(42)-C(43)-H(43) | 119.0     |
| C(43)-C(44)-C(45) | 120(2)    |
| C(43)-C(44)-H(44) | 119.9     |
| C(45)-C(44)-H(44) | 119.9     |
| C(44)-C(45)-C(46) | 122.5(19) |
| C(44)-C(45)-H(45) | 118.8     |
| C(46)-C(45)-H(45) | 118.8     |
| C(41)-C(46)-C(45) | 118.8(17) |
| C(41)-C(46)-H(46) | 120.6     |
| C(45)-C(46)-H(46) | 120.6     |
| C(54)-C(47)-C(48) | 117.7(15) |
| C(54)-C(47)-H(47) | 121.2     |
| C(48)-C(47)-H(47) | 121.2     |
| N(6)-C(48)-C(47)  | 121.4(16) |
| N(6)-C(48)-H(48)  | 119.3     |
| C(47)-C(48)-H(48) | 119.3     |
| C(50)-C(49)-C(1)  | 119.3(17) |
| C(50)-C(49)-C(73) | 126.5(17) |

|                    |           |
|--------------------|-----------|
| C(1)-C(49)-C(73)   | 113.5(16) |
| C(49)-C(50)-C(51)  | 125(2)    |
| C(49)-C(50)-H(50)  | 117.3     |
| C(51)-C(50)-H(50)  | 117.3     |
| C(50)-C(51)-C(52)  | 119.9(19) |
| C(50)-C(51)-Cl(2)  | 133(2)    |
| C(52)-C(51)-Cl(2)  | 107(2)    |
| C(50)-C(51)-Cl(2') | 113.7(19) |
| C(52)-C(51)-Cl(2') | 126(2)    |
| C(51)-C(52)-C(53)  | 117.5(18) |
| C(51)-C(52)-H(52)  | 121.3     |
| C(53)-C(52)-H(52)  | 121.3     |
| C(52)-C(53)-C(1)   | 123(2)    |
| C(52)-C(53)-H(53)  | 118.5     |
| C(1)-C(53)-H(53)   | 118.5     |
| N(4)-C(54)-C(47)   | 122.7(13) |
| N(4)-C(54)-C(55)   | 116.4(15) |
| C(47)-C(54)-C(55)  | 120.9(15) |
| C(56)-C(55)-C(60)  | 119.1(16) |
| C(56)-C(55)-C(54)  | 122.7(18) |
| C(60)-C(55)-C(54)  | 118.2(16) |
| C(55)-C(56)-C(57)  | 122(2)    |
| C(55)-C(56)-H(56)  | 119.1     |
| C(57)-C(56)-H(56)  | 119.1     |
| C(58)-C(57)-C(56)  | 118.4(17) |
| C(58)-C(57)-Cl(1') | 105(2)    |
| C(56)-C(57)-Cl(1') | 135(2)    |
| C(58)-C(57)-Cl(1)  | 126.3(17) |
| C(56)-C(57)-Cl(1)  | 114.7(18) |
| C(59)-C(58)-C(57)  | 120.9(19) |
| C(59)-C(58)-H(58)  | 119.6     |
| C(57)-C(58)-H(58)  | 119.6     |
| C(58)-C(59)-C(60)  | 121(2)    |
| C(58)-C(59)-H(59)  | 119.3     |
| C(60)-C(59)-H(59)  | 119.3     |
| C(55)-C(60)-C(59)  | 118(2)    |
| C(55)-C(60)-H(60)  | 121.0     |
| C(59)-C(60)-H(60)  | 121.0     |

|                   |           |
|-------------------|-----------|
| C(73)-C(63)-C(65) | 117.2(13) |
| C(73)-C(63)-H(63) | 121.4     |
| C(65)-C(63)-H(63) | 121.4     |
| N(5)-C(64)-N(4)   | 118.4(15) |
| N(5)-C(64)-N(6)   | 118.9(12) |
| N(4)-C(64)-N(6)   | 122.5(13) |
| N(1)-C(65)-C(63)  | 121.0(15) |
| N(1)-C(65)-H(65)  | 119.5     |
| C(63)-C(65)-H(65) | 119.5     |
| C(17)-C(66)-C(67) | 120(2)    |
| C(17)-C(66)-H(66) | 119.9     |
| C(67)-C(66)-H(66) | 119.9     |
| C(66)-C(67)-C(68) | 118(2)    |
| C(66)-C(67)-H(67) | 121.2     |
| C(68)-C(67)-H(67) | 121.2     |
| C(16)-C(68)-C(67) | 124(2)    |
| C(16)-C(68)-H(68) | 117.9     |
| C(67)-C(68)-H(68) | 117.9     |
| C(40)-C(69)-C(37) | 120.1(17) |
| C(40)-C(69)-H(69) | 120.0     |
| C(37)-C(69)-H(69) | 120.0     |
| C(13)-C(71)-C(14) | 117(2)    |
| C(13)-C(71)-H(71) | 121.7     |
| C(14)-C(71)-H(71) | 121.7     |
| N(3)-C(72)-N(2)   | 118.0(14) |
| N(3)-C(72)-N(1)   | 124.4(13) |
| N(2)-C(72)-N(1)   | 117.5(13) |
| N(3)-C(73)-C(63)  | 121.9(14) |
| N(3)-C(73)-C(49)  | 121.5(15) |
| C(63)-C(73)-C(49) | 116.3(14) |

---

Symmetry transformations used to generate equivalent atoms:

Table 4. Anisotropic displacement parameters ( $\text{\AA}^2 \times 10^3$ ) for 161012a\_a\_sq\_d. The anisotropic displacement factor exponent takes the form:  $-2\pi^2 [ h^2 a^{*2} U^{11} + \dots + 2 h k a^* b^* U^{12} ]$

|       | U <sup>11</sup> | U <sup>22</sup> | U <sup>33</sup> | U <sup>23</sup> | U <sup>13</sup> | U <sup>12</sup> |
|-------|-----------------|-----------------|-----------------|-----------------|-----------------|-----------------|
| Ag(1) | 56(1)           | 79(1)           | 93(1)           | 12(1)           | -7(1)           | 6(1)            |
| Ag(2) | 56(1)           | 70(1)           | 81(1)           | 0(1)            | 7(1)            | 15(1)           |
| Ag(3) | 66(1)           | 62(1)           | 84(1)           | 6(1)            | -8(1)           | 12(1)           |
| Ag(4) | 70(1)           | 64(1)           | 80(1)           | 13(1)           | -4(1)           | 21(1)           |
| Ag(5) | 47(1)           | 55(1)           | 83(1)           | 7(1)            | -2(1)           | -4(1)           |
| P(1)  | 47(2)           | 53(2)           | 77(2)           | 1(2)            | 4(2)            | 4(1)            |
| P(2)  | 45(2)           | 59(2)           | 95(3)           | 11(2)           | -8(2)           | -1(1)           |
| P(3)  | 50(2)           | 50(2)           | 79(2)           | 3(2)            | -3(2)           | 2(1)            |
| P(4)  | 47(2)           | 50(2)           | 77(2)           | 11(2)           | -5(2)           | 3(1)            |
| N(1)  | 50(4)           | 60(5)           | 63(5)           | 11(4)           | -4(4)           | 4(4)            |
| N(2)  | 73(6)           | 64(5)           | 77(6)           | 9(5)            | 8(5)            | 6(5)            |
| N(3)  | 71(6)           | 56(5)           | 79(6)           | 5(5)            | 10(5)           | 5(5)            |
| N(4)  | 48(5)           | 71(6)           | 85(6)           | 16(5)           | -6(5)           | 11(5)           |
| N(5)  | 48(5)           | 69(6)           | 86(6)           | 9(5)            | -6(5)           | 10(5)           |
| N(6)  | 50(5)           | 67(5)           | 78(5)           | 16(5)           | -1(5)           | 11(4)           |
| C(1)  | 93(8)           | 74(7)           | 105(8)          | -4(7)           | 21(7)           | -3(7)           |
| C(2)  | 51(5)           | 48(5)           | 76(6)           | 3(5)            | -1(5)           | -5(4)           |
| C(3)  | 45(5)           | 53(5)           | 89(6)           | 12(5)           | 0(5)            | -4(4)           |
| C(4)  | 59(6)           | 66(6)           | 102(7)          | 10(6)           | -18(6)          | -4(5)           |
| C(5)  | 74(7)           | 78(7)           | 114(8)          | 11(7)           | -22(7)          | -9(6)           |
| C(6)  | 81(8)           | 92(9)           | 118(10)         | 4(8)            | -33(8)          | -8(8)           |
| C(7)  | 66(8)           | 96(9)           | 128(10)         | 29(9)           | -23(8)          | 2(8)            |
| C(8)  | 62(8)           | 84(8)           | 133(11)         | 4(9)            | -17(8)          | -9(7)           |
| C(9)  | 49(6)           | 63(6)           | 108(8)          | 10(6)           | -12(6)          | -8(5)           |
| C(10) | 63(6)           | 75(6)           | 125(7)          | 11(7)           | -1(6)           | 1(6)            |
| C(11) | 80(8)           | 90(8)           | 139(10)         | 13(9)           | 9(9)            | 0(7)            |
| C(12) | 108(10)         | 86(9)           | 175(12)         | 1(10)           | 24(10)          | -9(9)           |
| C(13) | 98(10)          | 87(9)           | 172(12)         | 12(10)          | 18(10)          | -26(8)          |
| C(14) | 71(7)           | 78(7)           | 146(8)          | 11(7)           | 11(7)           | 0(6)            |
| C(15) | 75(7)           | 104(8)          | 141(9)          | 35(8)           | 31(7)           | -2(7)           |
| C(16) | 63(6)           | 80(6)           | 113(7)          | 20(6)           | 10(6)           | -5(6)           |
| C(17) | 84(9)           | 119(11)         | 159(12)         | 25(10)          | 48(9)           | 3(9)            |
| C(18) | 62(6)           | 71(6)           | 99(7)           | 11(6)           | 12(6)           | 4(6)            |



|       |        |         |         |        |        |        |
|-------|--------|---------|---------|--------|--------|--------|
| C(19) | 68(6)  | 77(7)   | 95(7)   | 10(6)  | 3(6)   | -12(6) |
| C(20) | 94(8)  | 77(7)   | 105(8)  | -9(7)  | 13(7)  | 8(7)   |
| C(21) | 88(9)  | 103(10) | 105(10) | -16(9) | 6(8)   | -16(8) |
| C(22) | 67(7)  | 88(7)   | 98(8)   | 5(7)   | -1(6)  | -6(6)  |
| C(23) | 89(9)  | 109(10) | 103(10) | -6(9)  | -2(9)  | -14(9) |
| C(24) | 58(6)  | 57(5)   | 82(6)   | 2(5)   | -5(5)  | 0(5)   |
| C(25) | 75(6)  | 47(5)   | 92(7)   | 9(6)   | 8(6)   | 0(5)   |
| C(26) | 74(8)  | 61(7)   | 116(9)  | -3(7)  | 3(8)   | 7(6)   |
| C(27) | 98(9)  | 74(8)   | 119(10) | -6(8)  | 16(9)  | -3(8)  |
| C(28) | 91(9)  | 76(8)   | 98(9)   | -9(7)  | -6(8)  | -5(7)  |
| C(29) | 75(7)  | 70(7)   | 94(8)   | 2(7)   | 2(7)   | 11(6)  |
| C(30) | 53(5)  | 62(6)   | 88(6)   | -1(6)  | -4(5)  | -12(5) |
| C(31) | 66(6)  | 69(6)   | 102(7)  | 5(6)   | 11(6)  | -6(6)  |
| C(32) | 78(8)  | 85(8)   | 104(9)  | 1(8)   | 9(7)   | -14(7) |
| C(33) | 77(8)  | 108(9)  | 124(10) | 2(9)   | 13(8)  | -25(8) |
| C(34) | 67(8)  | 116(10) | 127(10) | -6(9)  | 4(8)   | -2(8)  |
| C(35) | 50(6)  | 98(8)   | 111(9)  | 8(7)   | 4(6)   | -2(6)  |
| C(36) | 68(6)  | 65(6)   | 88(6)   | 0(6)   | 0(6)   | -2(5)  |
| C(37) | 63(6)  | 52(6)   | 91(7)   | 20(6)  | 5(6)   | -3(5)  |
| C(38) | 61(6)  | 78(7)   | 88(7)   | 4(6)   | 1(6)   | -4(6)  |
| C(39) | 86(8)  | 93(8)   | 89(8)   | -9(7)  | 6(7)   | -12(7) |
| C(40) | 92(9)  | 82(8)   | 101(9)  | 10(8)  | 12(8)  | -26(7) |
| C(41) | 52(6)  | 61(6)   | 90(7)   | 13(6)  | 8(5)   | 3(5)   |
| C(42) | 81(7)  | 83(7)   | 105(8)  | 4(7)   | -8(7)  | 3(7)   |
| C(43) | 99(10) | 103(10) | 120(10) | -20(9) | -11(9) | -4(9)  |
| C(44) | 91(9)  | 98(10)  | 119(10) | -16(9) | -18(9) | -4(8)  |
| C(45) | 73(7)  | 99(8)   | 114(8)  | 1(8)   | -21(7) | -6(7)  |
| C(46) | 69(6)  | 73(6)   | 96(7)   | -5(6)  | -4(6)  | -9(6)  |
| C(47) | 54(6)  | 72(6)   | 104(7)  | 12(7)  | -3(6)  | 17(5)  |
| C(48) | 54(6)  | 66(6)   | 93(7)   | 14(6)  | -3(6)  | 5(5)   |
| C(49) | 75(7)  | 57(6)   | 96(7)   | -13(6) | 18(6)  | -3(6)  |
| C(50) | 83(7)  | 65(7)   | 113(8)  | -6(7)  | 20(7)  | 4(6)   |
| C(51) | 90(8)  | 66(7)   | 134(10) | -13(8) | 29(8)  | -18(7) |
| C(52) | 98(9)  | 73(8)   | 138(10) | -23(9) | 35(9)  | 2(8)   |
| C(53) | 107(9) | 92(9)   | 117(10) | -19(8) | 32(8)  | -15(8) |
| C(54) | 48(5)  | 63(5)   | 98(7)   | 20(6)  | -10(6) | 2(5)   |
| C(55) | 51(6)  | 70(7)   | 120(8)  | 18(7)  | -18(6) | 6(5)   |
| C(56) | 50(6)  | 79(7)   | 130(9)  | 19(7)  | -8(7)  | 1(6)   |

|        |         |         |         |        |         |        |
|--------|---------|---------|---------|--------|---------|--------|
| C(57)  | 54(7)   | 83(8)   | 147(10) | 22(8)  | -14(8)  | 11(6)  |
| C(58)  | 73(8)   | 98(9)   | 160(11) | 34(10) | -28(9)  | 1(8)   |
| C(59)  | 72(8)   | 107(9)  | 134(10) | 26(9)  | -24(8)  | 12(8)  |
| C(60)  | 70(7)   | 82(8)   | 124(9)  | 24(8)  | -18(7)  | 9(7)   |
| C(63)  | 58(6)   | 55(6)   | 87(7)   | 8(6)   | 8(6)    | 7(5)   |
| C(64)  | 47(5)   | 61(5)   | 92(6)   | 16(6)  | -6(5)   | 9(5)   |
| C(65)  | 61(6)   | 62(6)   | 77(6)   | 10(5)  | 4(5)    | 8(5)   |
| C(66)  | 101(10) | 109(10) | 139(11) | 25(10) | 38(9)   | -13(9) |
| C(67)  | 116(11) | 108(10) | 151(12) | 35(10) | 34(10)  | 9(10)  |
| C(68)  | 92(8)   | 95(8)   | 134(9)  | 20(8)  | 28(8)   | 11(8)  |
| C(69)  | 94(9)   | 77(8)   | 96(9)   | 18(8)  | 9(8)    | -4(7)  |
| C(71)  | 96(10)  | 100(10) | 174(12) | 12(10) | 27(10)  | -19(9) |
| C(72)  | 62(6)   | 60(5)   | 75(6)   | 7(5)   | 9(6)    | -9(5)  |
| C(73)  | 61(6)   | 59(6)   | 84(6)   | 8(6)   | 25(5)   | -4(5)  |
| Cl(1)  | 76(5)   | 83(5)   | 185(14) | 51(8)  | -13(9)  | 24(4)  |
| Cl(2)  | 85(6)   | 112(7)  | 196(14) | -52(9) | 41(9)   | 26(5)  |
| Cl(1') | 75(8)   | 87(10)  | 154(16) | 39(11) | -36(11) | 18(7)  |
| Cl(2') | 63(8)   | 76(9)   | 135(15) | -14(9) | 32(9)   | 13(6)  |

---

Table 5. Hydrogen coordinates ( $\times 10^4$ ) and isotropic displacement parameters ( $\text{\AA}^2 \times 10^{-3}$ ) for 161012a\_a\_sq\_d.

|       | x    | y    | z    | U(eq) |
|-------|------|------|------|-------|
| H(2A) | 2677 | 7754 | 6724 | 86    |
| H(5A) | 2231 | 7266 | 4395 | 82    |
| H(1)  | 1879 | 8914 | 7225 | 109   |
| H(2)  | 3249 | 5571 | 6095 | 70    |
| H(3)  | 4369 | 6827 | 5000 | 75    |
| H(5)  | 4771 | 7616 | 6706 | 106   |
| H(6)  | 5340 | 7227 | 7254 | 116   |
| H(7)  | 5556 | 6413 | 7095 | 116   |
| H(8)  | 5227 | 5998 | 6347 | 112   |
| H(9)  | 4592 | 6350 | 5883 | 88    |
| H(11) | 4058 | 8429 | 5698 | 124   |
| H(12) | 4539 | 9099 | 5387 | 148   |
| H(13) | 5274 | 8948 | 4991 | 143   |
| H(14) | 5150 | 7536 | 5308 | 118   |
| H(15) | 4636 | 7191 | 4105 | 128   |
| H(17) | 5092 | 7678 | 3564 | 145   |
| H(19) | 3938 | 6203 | 4366 | 96    |
| H(20) | 3657 | 5658 | 3690 | 110   |
| H(21) | 2978 | 5857 | 3151 | 118   |
| H(22) | 2951 | 7224 | 3838 | 102   |
| H(23) | 2668 | 6648 | 3188 | 121   |
| H(25) | 3716 | 5357 | 5231 | 85    |
| H(26) | 4095 | 4768 | 4657 | 100   |
| H(27) | 3667 | 4375 | 3983 | 117   |
| H(28) | 2844 | 4542 | 3886 | 106   |
| H(29) | 2468 | 5090 | 4475 | 95    |
| H(31) | 2567 | 4786 | 5929 | 95    |
| H(32) | 1942 | 4319 | 6243 | 107   |
| H(33) | 1161 | 4533 | 6031 | 124   |
| H(34) | 1006 | 5252 | 5569 | 124   |
| H(35) | 1660 | 5784 | 5206 | 104   |
| H(37) | 3000 | 5401 | 7165 | 82    |

|       |      |      |      |     |
|-------|------|------|------|-----|
| H(38) | 1767 | 6066 | 6652 | 90  |
| H(39) | 1318 | 5427 | 7164 | 107 |
| H(40) | 1711 | 4872 | 7633 | 110 |
| H(42) | 2809 | 6997 | 7312 | 108 |
| H(43) | 3362 | 7264 | 7944 | 129 |
| H(44) | 4119 | 6962 | 7968 | 123 |
| H(45) | 4328 | 6310 | 7437 | 114 |
| H(46) | 3806 | 6001 | 6743 | 95  |
| H(47) | 830  | 8049 | 5729 | 92  |
| H(48) | 1348 | 7505 | 6208 | 85  |
| H(50) | 1282 | 9489 | 5867 | 105 |
| H(52) | 790  | 9946 | 7306 | 124 |
| H(53) | 1386 | 9470 | 7737 | 126 |
| H(56) | 547  | 8665 | 5249 | 104 |
| H(58) | -7   | 9007 | 3752 | 133 |
| H(59) | 455  | 8433 | 3360 | 125 |
| H(60) | 977  | 7919 | 3906 | 111 |
| H(63) | 1774 | 9105 | 5394 | 80  |
| H(65) | 2319 | 8601 | 4886 | 80  |
| H(66) | 4830 | 8413 | 3272 | 140 |
| H(67) | 4079 | 8679 | 3506 | 150 |
| H(68) | 3664 | 8247 | 4217 | 128 |
| H(69) | 2531 | 4810 | 7626 | 107 |
| H(71) | 5595 | 8177 | 4954 | 148 |

---

Table 6. Torsion angles [°] for 161012a\_a\_sq\_d.

---

|                       |            |
|-----------------------|------------|
| C(41)-P(4)-C(2)-P(3)  | -167.4(7)  |
| C(36)-P(4)-C(2)-P(3)  | 84.5(8)    |
| Ag(4)-P(4)-C(2)-P(3)  | -46.3(8)   |
| C(41)-P(4)-C(2)-Ag(5) | -61.6(7)   |
| C(36)-P(4)-C(2)-Ag(5) | -169.7(7)  |
| Ag(4)-P(4)-C(2)-Ag(5) | 59.5(6)    |
| C(24)-P(3)-C(2)-P(4)  | -173.4(7)  |
| C(30)-P(3)-C(2)-P(4)  | -65.8(9)   |
| Ag(3)-P(3)-C(2)-P(4)  | 58.3(7)    |
| C(24)-P(3)-C(2)-Ag(5) | 78.6(7)    |
| C(30)-P(3)-C(2)-Ag(5) | -173.8(6)  |
| Ag(3)-P(3)-C(2)-Ag(5) | -49.8(5)   |
| C(16)-P(1)-C(3)-P(2)  | 84.8(10)   |
| C(18)-P(1)-C(3)-P(2)  | -167.3(7)  |
| Ag(2)-P(1)-C(3)-P(2)  | -47.5(8)   |
| C(16)-P(1)-C(3)-Ag(5) | -167.9(8)  |
| C(18)-P(1)-C(3)-Ag(5) | -60.0(8)   |
| Ag(2)-P(1)-C(3)-Ag(5) | 59.8(7)    |
| C(10)-P(2)-C(3)-P(1)  | -67.4(9)   |
| C(4)-P(2)-C(3)-P(1)   | -174.5(7)  |
| Ag(1)-P(2)-C(3)-P(1)  | 57.7(7)    |
| C(10)-P(2)-C(3)-Ag(5) | -177.1(6)  |
| C(4)-P(2)-C(3)-Ag(5)  | 75.8(7)    |
| Ag(1)-P(2)-C(3)-Ag(5) | -52.0(5)   |
| C(3)-P(2)-C(4)-C(9)   | -13.8(18)  |
| C(10)-P(2)-C(4)-C(9)  | -126.6(17) |
| Ag(1)-P(2)-C(4)-C(9)  | 108.0(16)  |
| C(3)-P(2)-C(4)-C(5)   | 169.8(14)  |
| C(10)-P(2)-C(4)-C(5)  | 57.0(16)   |
| Ag(1)-P(2)-C(4)-C(5)  | -68.4(15)  |
| C(9)-C(4)-C(5)-C(6)   | 4(3)       |
| P(2)-C(4)-C(5)-C(6)   | -179.4(16) |
| C(4)-C(5)-C(6)-C(7)   | 0(3)       |
| C(5)-C(6)-C(7)-C(8)   | 1(3)       |
| C(6)-C(7)-C(8)-C(9)   | -5(3)      |
| C(5)-C(4)-C(9)-C(8)   | -9(3)      |

|                         |            |
|-------------------------|------------|
| P(2)-C(4)-C(9)-C(8)     | 174.8(15)  |
| C(7)-C(8)-C(9)-C(4)     | 10(3)      |
| C(3)-P(2)-C(10)-C(14)   | -63(2)     |
| C(4)-P(2)-C(10)-C(14)   | 48(2)      |
| Ag(1)-P(2)-C(10)-C(14)  | 175.8(18)  |
| C(3)-P(2)-C(10)-C(11)   | 115.9(19)  |
| C(4)-P(2)-C(10)-C(11)   | -133(2)    |
| Ag(1)-P(2)-C(10)-C(11)  | -6(2)      |
| C(14)-C(10)-C(11)-C(12) | 0(3)       |
| P(2)-C(10)-C(11)-C(12)  | -178.3(19) |
| C(10)-C(11)-C(12)-C(13) | 2(4)       |
| C(11)-C(12)-C(13)-C(71) | -3(5)      |
| C(11)-C(10)-C(14)-C(71) | -3(4)      |
| P(2)-C(10)-C(14)-C(71)  | 176(2)     |
| C(17)-C(15)-C(16)-C(68) | -2(4)      |
| C(17)-C(15)-C(16)-P(1)  | 180(2)     |
| C(3)-P(1)-C(16)-C(68)   | -137.5(19) |
| C(18)-P(1)-C(16)-C(68)  | 109(2)     |
| Ag(2)-P(1)-C(16)-C(68)  | -6(2)      |
| C(3)-P(1)-C(16)-C(15)   | 41(2)      |
| C(18)-P(1)-C(16)-C(15)  | -72(2)     |
| Ag(2)-P(1)-C(16)-C(15)  | 172.3(18)  |
| C(16)-C(15)-C(17)-C(66) | -3(5)      |
| C(3)-P(1)-C(18)-C(22)   | 166.7(13)  |
| C(16)-P(1)-C(18)-C(22)  | -80.0(15)  |
| Ag(2)-P(1)-C(18)-C(22)  | 42.3(15)   |
| C(3)-P(1)-C(18)-C(19)   | -12.5(16)  |
| C(16)-P(1)-C(18)-C(19)  | 100.8(15)  |
| Ag(2)-P(1)-C(18)-C(19)  | -136.8(13) |
| C(22)-C(18)-C(19)-C(20) | 2(2)       |
| P(1)-C(18)-C(19)-C(20)  | -179.1(13) |
| C(18)-C(19)-C(20)-C(21) | -4(3)      |
| C(19)-C(20)-C(21)-C(23) | 5(3)       |
| C(19)-C(18)-C(22)-C(23) | -1(3)      |
| P(1)-C(18)-C(22)-C(23)  | -179.7(14) |
| C(20)-C(21)-C(23)-C(22) | -4(3)      |
| C(18)-C(22)-C(23)-C(21) | 2(3)       |
| C(2)-P(3)-C(24)-C(29)   | 164.0(13)  |

|                         |            |
|-------------------------|------------|
| C(30)-P(3)-C(24)-C(29)  | 50.8(14)   |
| Ag(3)-P(3)-C(24)-C(29)  | -74.8(14)  |
| C(2)-P(3)-C(24)-C(25)   | -14.6(15)  |
| C(30)-P(3)-C(24)-C(25)  | -127.8(14) |
| Ag(3)-P(3)-C(24)-C(25)  | 106.6(13)  |
| C(29)-C(24)-C(25)-C(26) | 0(2)       |
| P(3)-C(24)-C(25)-C(26)  | 178.9(12)  |
| C(24)-C(25)-C(26)-C(27) | 1(3)       |
| C(25)-C(26)-C(27)-C(28) | -1(3)      |
| C(26)-C(27)-C(28)-C(29) | 0(3)       |
| C(25)-C(24)-C(29)-C(28) | -2(2)      |
| P(3)-C(24)-C(29)-C(28)  | 179.4(14)  |
| C(27)-C(28)-C(29)-C(24) | 2(3)       |
| C(24)-P(3)-C(30)-C(31)  | 58.2(17)   |
| C(2)-P(3)-C(30)-C(31)   | -53.6(17)  |
| Ag(3)-P(3)-C(30)-C(31)  | -173.3(14) |
| C(24)-P(3)-C(30)-C(35)  | -120.0(14) |
| C(2)-P(3)-C(30)-C(35)   | 128.1(14)  |
| Ag(3)-P(3)-C(30)-C(35)  | 8.4(15)    |
| C(35)-C(30)-C(31)-C(32) | -3(3)      |
| P(3)-C(30)-C(31)-C(32)  | 178.3(15)  |
| C(30)-C(31)-C(32)-C(33) | 3(3)       |
| C(31)-C(32)-C(33)-C(34) | -2(3)      |
| C(32)-C(33)-C(34)-C(35) | 3(3)       |
| C(31)-C(30)-C(35)-C(34) | 3(2)       |
| P(3)-C(30)-C(35)-C(34)  | -178.4(14) |
| C(33)-C(34)-C(35)-C(30) | -3(3)      |
| C(2)-P(4)-C(36)-C(38)   | -115.1(14) |
| C(41)-P(4)-C(36)-C(38)  | 133.3(14)  |
| Ag(4)-P(4)-C(36)-C(38)  | 14.8(16)   |
| C(2)-P(4)-C(36)-C(37)   | 59.2(15)   |
| C(41)-P(4)-C(36)-C(37)  | -52.4(16)  |
| Ag(4)-P(4)-C(36)-C(37)  | -171.0(12) |
| C(38)-C(36)-C(37)-C(69) | -1(3)      |
| P(4)-C(36)-C(37)-C(69)  | -174.7(14) |
| C(37)-C(36)-C(38)-C(39) | 1(3)       |
| P(4)-C(36)-C(38)-C(39)  | 175.3(12)  |
| C(36)-C(38)-C(39)-C(40) | 0(3)       |

|                          |            |
|--------------------------|------------|
| C(38)-C(39)-C(40)-C(69)  | -2(3)      |
| C(2)-P(4)-C(41)-C(46)    | -15.9(15)  |
| C(36)-P(4)-C(41)-C(46)   | 94.4(15)   |
| Ag(4)-P(4)-C(41)-C(46)   | -141.3(13) |
| C(2)-P(4)-C(41)-C(42)    | 167.0(13)  |
| C(36)-P(4)-C(41)-C(42)   | -82.7(14)  |
| Ag(4)-P(4)-C(41)-C(42)   | 41.6(14)   |
| C(46)-C(41)-C(42)-C(43)  | 1(3)       |
| P(4)-C(41)-C(42)-C(43)   | 178.4(17)  |
| C(41)-C(42)-C(43)-C(44)  | 1(4)       |
| C(42)-C(43)-C(44)-C(45)  | -4(4)      |
| C(43)-C(44)-C(45)-C(46)  | 5(4)       |
| C(42)-C(41)-C(46)-C(45)  | 0(2)       |
| P(4)-C(41)-C(46)-C(45)   | -177.5(14) |
| C(44)-C(45)-C(46)-C(41)  | -3(3)      |
| C(64)-N(6)-C(48)-C(47)   | -5(2)      |
| Ag(4)-N(6)-C(48)-C(47)   | 170.0(11)  |
| C(54)-C(47)-C(48)-N(6)   | 4(2)       |
| C(53)-C(1)-C(49)-C(50)   | 5(2)       |
| C(53)-C(1)-C(49)-C(73)   | 176.2(14)  |
| C(1)-C(49)-C(50)-C(51)   | -7(3)      |
| C(73)-C(49)-C(50)-C(51)  | -177.0(16) |
| C(49)-C(50)-C(51)-C(52)  | 1(3)       |
| C(49)-C(50)-C(51)-Cl(2)  | -178.1(18) |
| C(49)-C(50)-C(51)-Cl(2') | -176.4(17) |
| C(50)-C(51)-C(52)-C(53)  | 5(3)       |
| Cl(2)-C(51)-C(52)-C(53)  | -175.1(16) |
| Cl(2')-C(51)-C(52)-C(53) | -177.2(17) |
| C(51)-C(52)-C(53)-C(1)   | -7(3)      |
| C(49)-C(1)-C(53)-C(52)   | 2(3)       |
| C(64)-N(4)-C(54)-C(47)   | -2(2)      |
| C(64)-N(4)-C(54)-C(55)   | -179.8(13) |
| C(48)-C(47)-C(54)-N(4)   | 0(2)       |
| C(48)-C(47)-C(54)-C(55)  | 177.5(14)  |
| N(4)-C(54)-C(55)-C(56)   | -162.7(15) |
| C(47)-C(54)-C(55)-C(56)  | 20(2)      |
| N(4)-C(54)-C(55)-C(60)   | 18(2)      |
| C(47)-C(54)-C(55)-C(60)  | -159.4(17) |



|                          |            |
|--------------------------|------------|
| C(60)-C(55)-C(56)-C(57)  | 3(3)       |
| C(54)-C(55)-C(56)-C(57)  | -176.5(15) |
| C(55)-C(56)-C(57)-C(58)  | -6(3)      |
| C(55)-C(56)-C(57)-Cl(1') | -173(2)    |
| C(55)-C(56)-C(57)-Cl(1)  | -178.1(14) |
| C(56)-C(57)-C(58)-C(59)  | 6(3)       |
| Cl(1')-C(57)-C(58)-C(59) | 176(2)     |
| Cl(1)-C(57)-C(58)-C(59)  | 176.3(18)  |
| C(57)-C(58)-C(59)-C(60)  | -1(3)      |
| C(56)-C(55)-C(60)-C(59)  | 1(3)       |
| C(54)-C(55)-C(60)-C(59)  | -179.3(16) |
| C(58)-C(59)-C(60)-C(55)  | -2(3)      |
| Ag(3)-N(5)-C(64)-N(4)    | -145.9(11) |
| Ag(2)-N(5)-C(64)-N(4)    | 108.1(13)  |
| Ag(3)-N(5)-C(64)-N(6)    | 39.4(18)   |
| Ag(2)-N(5)-C(64)-N(6)    | -66.6(14)  |
| C(54)-N(4)-C(64)-N(5)    | -173.5(13) |
| C(54)-N(4)-C(64)-N(6)    | 1(2)       |
| C(48)-N(6)-C(64)-N(5)    | 177.4(13)  |
| Ag(4)-N(6)-C(64)-N(5)    | 2.2(18)    |
| C(48)-N(6)-C(64)-N(4)    | 3(2)       |
| Ag(4)-N(6)-C(64)-N(4)    | -172.3(10) |
| C(72)-N(1)-C(65)-C(63)   | 1(2)       |
| Ag(2)-N(1)-C(65)-C(63)   | 172.6(11)  |
| C(73)-C(63)-C(65)-N(1)   | 3(2)       |
| C(15)-C(17)-C(66)-C(67)  | 0(5)       |
| C(17)-C(66)-C(67)-C(68)  | 6(4)       |
| C(15)-C(16)-C(68)-C(67)  | 8(4)       |
| P(1)-C(16)-C(68)-C(67)   | -173(2)    |
| C(66)-C(67)-C(68)-C(16)  | -11(4)     |
| C(39)-C(40)-C(69)-C(37)  | 3(3)       |
| C(36)-C(37)-C(69)-C(40)  | -1(3)      |
| C(12)-C(13)-C(71)-C(14)  | 1(5)       |
| C(10)-C(14)-C(71)-C(13)  | 2(4)       |
| C(73)-N(3)-C(72)-N(2)    | -180.0(13) |
| C(73)-N(3)-C(72)-N(1)    | 3(2)       |
| Ag(1)-N(2)-C(72)-N(3)    | -140.7(11) |
| Ag(4)-N(2)-C(72)-N(3)    | 111.5(12)  |

|                         |            |
|-------------------------|------------|
| Ag(1)-N(2)-C(72)-N(1)   | 36.9(17)   |
| Ag(4)-N(2)-C(72)-N(1)   | -70.9(13)  |
| C(65)-N(1)-C(72)-N(3)   | -4(2)      |
| Ag(2)-N(1)-C(72)-N(3)   | -175.8(11) |
| C(65)-N(1)-C(72)-N(2)   | 178.9(13)  |
| Ag(2)-N(1)-C(72)-N(2)   | 6.7(16)    |
| C(72)-N(3)-C(73)-C(63)  | 2(2)       |
| C(72)-N(3)-C(73)-C(49)  | 176.3(13)  |
| C(65)-C(63)-C(73)-N(3)  | -5(2)      |
| C(65)-C(63)-C(73)-C(49) | -179.3(13) |
| C(50)-C(49)-C(73)-N(3)  | -172.0(16) |
| C(1)-C(49)-C(73)-N(3)   | 17(2)      |
| C(50)-C(49)-C(73)-C(63) | 3(2)       |
| C(1)-C(49)-C(73)-C(63)  | -168.1(14) |

---

Symmetry transformations used to generate equivalent atoms:
